# Supplementary material for: The Changes in Antioxidant Activity of Selected Flavonoids and Caffeine Depending on the Dosage and Form of Thiamine
Source: MDPI journal article supplement (doi:10.3390/molecules26154702), 2021-08-03
Supplement: s1 [file s1]

# The Changes in Antioxidant Activity of Selected Flavonoids and Caffeine Depending on the Dosage and Form of Thiamine

Justyna Piechocka, Anna Gramza-Michałowska and Krystyna Szymandera-Buszkla \*

Department of Gastronomy Science and Functional Foods, Faculty of Food Science and Nutrition, Poznań University of Life Sciences, 61-624 Poznań, Poland;  
justyna.piechocka@up.poznan.pl (J.P.); anna.gramza@up.poznan.pl (A.G.-M.)

\* Correspondence: krystyna.szymandera\_buszka@up.poznan.pl; Tel.: +48-061-846-6093

Table S1. Chelating properties to samples with thiamine hydrochloride and EGCG

| thiamine<br>[mg/100g] | Chelating properties             |                     |                      |                     |                     |                      |                      |                      |                      |
|-----------------------|----------------------------------|---------------------|----------------------|---------------------|---------------------|----------------------|----------------------|----------------------|----------------------|
|                       | Concentrations of EGCG [mg/100g] |                     |                      |                     |                     |                      |                      |                      |                      |
|                       | 0.04                             | 0.1                 | 0.5                  | 1.0                 | 2.0                 | 3.0                  | 4.0                  | 5.0                  | 6.0                  |
| 0                     | 100.00 <sup>e</sup>              | 100.00 <sup>f</sup> | 100.00 <sup>f</sup>  | 100.00 <sup>f</sup> | 100.00 <sup>f</sup> | 100.00 <sup>f</sup>  | 100.00 <sup>d</sup>  | 100.00 <sup>c</sup>  | 100.00 <sup>b</sup>  |
| 0.01                  | 100.21 <sup>e</sup>              | 100.15 <sup>f</sup> | 100.41 <sup>f</sup>  | 99.89 <sup>f</sup>  | 100.12 <sup>f</sup> | 100.44 <sup>f</sup>  | 100.08 <sup>d</sup>  | 100.13 <sup>c</sup>  | 100.09 <sup>b</sup>  |
| 0.02                  | 100.65 <sup>e</sup>              | 100.52 <sup>f</sup> | 100.25 <sup>f</sup>  | 99.54 <sup>f</sup>  | 102.08 <sup>f</sup> | 100.87 <sup>gf</sup> | 100.45 <sup>d</sup>  | 100.09 <sup>c</sup>  | 99.78 <sup>b</sup>   |
| 0.04                  | 99.78 <sup>e</sup>               | 100.00 <sup>f</sup> | 100.50 <sup>f</sup>  | 100.08 <sup>f</sup> | 100.99 <sup>f</sup> | 100.57 <sup>f</sup>  | 99.64 <sup>d</sup>   | 100.00 <sup>c</sup>  | 100.00 <sup>b</sup>  |
| 0.06                  | 100.06 <sup>e</sup>              | 100.08 <sup>f</sup> | 100.41 <sup>f</sup>  | 99.87 <sup>f</sup>  | 100.00 <sup>f</sup> | 100.55 <sup>f</sup>  | 99.57 <sup>d</sup>   | 100.32 <sup>dc</sup> | 99.86 <sup>b</sup>   |
| 0.08                  | 100.48 <sup>e</sup>              | 100.02 <sup>f</sup> | 100.16 <sup>f</sup>  | 100.54 <sup>f</sup> | 99.97 <sup>f</sup>  | 100.47 <sup>f</sup>  | 100.25 <sup>d</sup>  | 100.87 <sup>d</sup>  | 100.45 <sup>cb</sup> |
| 0.1                   | 99.98 <sup>e</sup>               | 100.98 <sup>f</sup> | 99.98 <sup>f</sup>   | 99.78 <sup>f</sup>  | 100.20 <sup>f</sup> | 99.98 <sup>f</sup>   | 101.43 <sup>e</sup>  | 100.03 <sup>c</sup>  | 99.78 <sup>b</sup>   |
| 0.2                   | 103.89 <sup>f</sup>              | 103.56 <sup>h</sup> | 104.56 <sup>ih</sup> | 102.56 <sup>g</sup> | 103.56 <sup>h</sup> | 101.5 <sup>g</sup>   | 102.35 <sup>fe</sup> | 100.98 <sup>d</sup>  | 100.36 <sup>cb</sup> |
| 0.4                   | 103.43 <sup>f</sup>              | 104.45 <sup>i</sup> | 101.23 <sup>g</sup>  | 103.23 <sup>h</sup> | 103.98 <sup>h</sup> | 102.30 <sup>h</sup>  | 100.95 <sup>ed</sup> | 99.53 <sup>c</sup>   | 99.78 <sup>b</sup>   |
| 0.8                   | 105.04 <sup>g</sup>              | 105.87 <sup>j</sup> | 104.98 <sup>i</sup>  | 105.13 <sup>i</sup> | 105.45 <sup>i</sup> | 104.23 <sup>i</sup>  | 102.35 <sup>e</sup>  | 100.50 <sup>dc</sup> | 100.50 <sup>c</sup>  |
| 1.0                   | 106.06 <sup>hg</sup>             | 105.89 <sup>j</sup> | 105.56 <sup>ij</sup> | 105.96 <sup>i</sup> | 105.24 <sup>i</sup> | 104.56 <sup>i</sup>  | 102.39 <sup>e</sup>  | 101.25 <sup>ed</sup> | 100.25 <sup>cb</sup> |
| 2.0                   | 106.99 <sup>h</sup>              | 106.89 <sup>k</sup> | 105.98 <sup>j</sup>  | 105.89 <sup>i</sup> | 105.03 <sup>i</sup> | 104.89 <sup>i</sup>  | 103.56 <sup>f</sup>  | 102.32 <sup>f</sup>  | 100.00 <sup>b</sup>  |
| 3.0                   | 103.45 <sup>f</sup>              | 103.29 <sup>h</sup> | 103.87 <sup>ih</sup> | 103.45 <sup>h</sup> | 103.65 <sup>h</sup> | 101.32 <sup>g</sup>  | 102.98 <sup>fe</sup> | 100.00 <sup>c</sup>  | 100.00 <sup>b</sup>  |
| 4.0                   | 100.86 <sup>e</sup>              | 101.23 <sup>g</sup> | 103.54 <sup>h</sup>  | 102.03 <sup>g</sup> | 101.98 <sup>g</sup> | 101.02 <sup>g</sup>  | 101.45 <sup>e</sup>  | 100.98 <sup>d</sup>  | 100.21 <sup>cb</sup> |
| 6.0                   | 94.98 <sup>d</sup>               | 95.03 <sup>e</sup>  | 95.23 <sup>e</sup>   | 94.98 <sup>e</sup>  | 96.01 <sup>e</sup>  | 96.02 <sup>e</sup>   | 99.65 <sup>d</sup>   | 100.50 <sup>dc</sup> | 100.03 <sup>b</sup>  |
| 8.0                   | 94.98 <sup>d</sup>               | 95.03 <sup>e</sup>  | 95.23 <sup>e</sup>   | 94.98 <sup>e</sup>  | 96.01 <sup>e</sup>  | 96.02 <sup>e</sup>   | 100.23 <sup>d</sup>  | 100.75 <sup>dc</sup> | 99.34 <sup>ba</sup>  |
| 9.0                   | 91.56 <sup>d</sup>               | 91.24 <sup>e</sup>  | 91.75 <sup>d</sup>   | 91.09 <sup>d</sup>  | 92.56 <sup>d</sup>  | 92.45 <sup>d</sup>   | 97.56 <sup>c</sup>   | 99.98 <sup>c</sup>   | 100.23 <sup>cb</sup> |
| 13.5                  | 85.69 <sup>c</sup>               | 86.58 <sup>c</sup>  | 86.45 <sup>c</sup>   | 86.46 <sup>c</sup>  | 86.55 <sup>c</sup>  | 87.69 <sup>c</sup>   | 88.21 <sup>b</sup>   | 98.89 <sup>b</sup>   | 99.56 <sup>ba</sup>  |
| 16                    | 84.12 <sup>b</sup>               | 84.76 <sup>b</sup>  | 83.75 <sup>b</sup>   | 84.23 <sup>b</sup>  | 84.59 <sup>b</sup>  | 85.01 <sup>b</sup>   | 87.98 <sup>b</sup>   | 98.75 <sup>b</sup>   | 99.45 <sup>ba</sup>  |
| 18                    | 82.04 <sup>a</sup>               | 82.16 <sup>a</sup>  | 83.41 <sup>b,a</sup> | 82.37 <sup>a</sup>  | 81.98 <sup>a</sup>  | 83.45 <sup>a</sup>   | 81.59 <sup>a</sup>   | 97.72 <sup>a</sup>   | 98.99 <sup>a</sup>   |
| 20                    | 81.23 <sup>a</sup>               | 81.98 <sup>a</sup>  | 82.31 <sup>a</sup>   | 82.03 <sup>a</sup>  | 82.11 <sup>a</sup>  | 82.33 <sup>a</sup>   | 86.87 <sup>a</sup>   | 97.01 <sup>a</sup>   | 98.78 <sup>a</sup>   |

Table S2. Chelating properties to samples with thiamine pyrophosphate and EGCG

| thiamine<br>[mg/100g] | Chelating properties             |                      |                      |                      |                      |                      |                      |                      |                     |
|-----------------------|----------------------------------|----------------------|----------------------|----------------------|----------------------|----------------------|----------------------|----------------------|---------------------|
|                       | Concentrations of EGCG [mg/100g] |                      |                      |                      |                      |                      |                      |                      |                     |
|                       | 0.04                             | 0.1                  | 0.5                  | 1.0                  | 2.0                  | 3.0                  | 4.0                  | 5.0                  | 6.0                 |
| 0                     | 100.00 <sup>f</sup>              | 100.00 <sup>f</sup>  | 100.00 <sup>h</sup>  | 100.00 <sup>g</sup>  | 100.00 <sup>gf</sup> | 100.00 <sup>e</sup>  | 100.00 <sup>f</sup>  | 100.00 <sup>c</sup>  | 100.00 <sup>b</sup> |
| 0.01                  | 100.00 <sup>f</sup>              | 100.15 <sup>f</sup>  | 100.41 <sup>ih</sup> | 99.89 <sup>g</sup>   | 100.89 <sup>g</sup>  | 100.44 <sup>e</sup>  | 99.87 <sup>f</sup>   | 100.00 <sup>c</sup>  | 99.89 <sup>b</sup>  |
| 0.02                  | 100.52 <sup>gf</sup>             | 100.52 <sup>f</sup>  | 100.25 <sup>h</sup>  | 99.67 <sup>g</sup>   | 102.08 <sup>h</sup>  | 100.33 <sup>e</sup>  | 99.96 <sup>f</sup>   | 100.45 <sup>dc</sup> | 99.94 <sup>b</sup>  |
| 0.04                  | 100.00 <sup>f</sup>              | 100.00 <sup>f</sup>  | 99.56 <sup>hg</sup>  | 100.08 <sup>hg</sup> | 100.99 <sup>g</sup>  | 100.22 <sup>e</sup>  | 99.98 <sup>f</sup>   | 100.00 <sup>c</sup>  | 100.00 <sup>b</sup> |
| 0.06                  | 99.89 <sup>f</sup>               | 100.08 <sup>f</sup>  | 99.09 <sup>g</sup>   | 101.56 <sup>ih</sup> | 100.00 <sup>gf</sup> | 100.55 <sup>e</sup>  | 100.21 <sup>gf</sup> | 99.95 <sup>c</sup>   | 100.06 <sup>b</sup> |
| 0.08                  | 99.67 <sup>f</sup>               | 100.02 <sup>f</sup>  | 100.17 <sup>h</sup>  | 100.97 <sup>h</sup>  | 99.89 <sup>f</sup>   | 100.87 <sup>ie</sup> | 100.19 <sup>gf</sup> | 101.25 <sup>ed</sup> | 100.50 <sup>b</sup> |
| 0.1                   | 101.43 <sup>g</sup>              | 101.43 <sup>g</sup>  | 100.43 <sup>h</sup>  | 100.23 <sup>hg</sup> | 100.65 <sup>gf</sup> | 100.43 <sup>e</sup>  | 101.88 <sup>hg</sup> | 100.23 <sup>dc</sup> | 99.78 <sup>b</sup>  |
| 0.2                   | 103.03 <sup>h</sup>              | 103.21 <sup>h</sup>  | 102.98 <sup>j</sup>  | 102.45 <sup>i</sup>  | 102.31 <sup>h</sup>  | 102.32 <sup>g</sup>  | 102.03 <sup>h</sup>  | 100.23 <sup>dc</sup> | 100.21 <sup>b</sup> |
| 0.4                   | 104.78 <sup>i</sup>              | 104.65 <sup>i</sup>  | 103.45 <sup>j</sup>  | 104.98 <sup>j</sup>  | 104.56 <sup>ji</sup> | 103.99 <sup>h</sup>  | 101.40 <sup>hg</sup> | 101.23 <sup>d</sup>  | 99.78 <sup>b</sup>  |
| 0.8                   | 104.98 <sup>i</sup>              | 104.99 <sup>ji</sup> | 104.85 <sup>k</sup>  | 105.03 <sup>j</sup>  | 105.45 <sup>j</sup>  | 105.51 <sup>i</sup>  | 104.45 <sup>i</sup>  | 100.91 <sup>d</sup>  | 100.48 <sup>b</sup> |
| 1.0                   | 106.45 <sup>j</sup>              | 106.71 <sup>k</sup>  | 106.54 <sup>l</sup>  | 106.14 <sup>k</sup>  | 106.23 <sup>kj</sup> | 106.04 <sup>i</sup>  | 105.42 <sup>j</sup>  | 100.59 <sup>dc</sup> | 100.25 <sup>b</sup> |
| 2.0                   | 107.45 <sup>k</sup>              | 107.03 <sup>k</sup>  | 107.49 <sup>l</sup>  | 107.56 <sup>l</sup>  | 107.21 <sup>k</sup>  | 107.65 <sup>j</sup>  | 106.89 <sup>k</sup>  | 102.35 <sup>e</sup>  | 100.00 <sup>b</sup> |
| 3.0                   | 105.98 <sup>j</sup>              | 105.89 <sup>j</sup>  | 105.45 <sup>k</sup>  | 104.23 <sup>j</sup>  | 103.65 <sup>i</sup>  | 103.03 <sup>hg</sup> | 104.23 <sup>i</sup>  | 100.98 <sup>d</sup>  | 100.00 <sup>b</sup> |
| 4.0                   | 100.86 <sup>gf</sup>             | 100.54 <sup>gf</sup> | 100.89 <sup>i</sup>  | 101.88 <sup>i</sup>  | 100.89 <sup>g</sup>  | 101.02 <sup>f</sup>  | 100.98 <sup>g</sup>  | 100.35 <sup>dc</sup> | 99.89 <sup>b</sup>  |
| 6.0                   | 93.85 <sup>e</sup>               | 93.90 <sup>e</sup>   | 94.10 <sup>f</sup>   | 93.85 <sup>f</sup>   | 94.88 <sup>e</sup>   | 94.89 <sup>d</sup>   | 98.52 <sup>e</sup>   | 99.37 <sup>c</sup>   | 100.21 <sup>b</sup> |
| 8.0                   | 93.85 <sup>e</sup>               | 93.90 <sup>e</sup>   | 94.10 <sup>f</sup>   | 93.85 <sup>f</sup>   | 94.88 <sup>e</sup>   | 94.89 <sup>e</sup>   | 98.52 <sup>e</sup>   | 99.62 <sup>c</sup>   | 99.65 <sup>ab</sup> |
| 9.0                   | 90.43 <sup>d</sup>               | 90.11 <sup>d</sup>   | 90.62 <sup>e</sup>   | 89.96 <sup>e</sup>   | 91.43 <sup>d</sup>   | 91.32 <sup>d</sup>   | 96.43 <sup>d</sup>   | 98.85 <sup>c</sup>   | 100.31 <sup>b</sup> |
| 13.5                  | 84.56 <sup>c</sup>               | 85.45 <sup>c</sup>   | 85.32 <sup>d</sup>   | 85.33 <sup>d</sup>   | 85.42 <sup>c</sup>   | 86.56 <sup>c</sup>   | 87.08 <sup>c</sup>   | 97.76 <sup>b</sup>   | 100.09 <sup>b</sup> |
| 16                    | 82.99 <sup>b</sup>               | 82.51 <sup>b</sup>   | 82.62 <sup>c</sup>   | 83.01 <sup>c</sup>   | 83.46 <sup>b</sup>   | 83.88 <sup>b</sup>   | 86.85 <sup>c</sup>   | 97.62 <sup>b</sup>   | 100.19 <sup>b</sup> |
| 18                    | 78.23 <sup>a</sup>               | 78.54 <sup>b</sup>   | 79.36 <sup>b</sup>   | 79.63 <sup>b</sup>   | 78.99 <sup>a</sup>   | 79.66 <sup>a</sup>   | 80.46 <sup>b</sup>   | 96.53 <sup>a</sup>   | 99.78 <sup>b</sup>  |
| 20                    | 77.87 <sup>a</sup>               | 77.45 <sup>a</sup>   | 78.03 <sup>a</sup>   | 78.12 <sup>a</sup>   | 78.90 <sup>a</sup>   | 79.10 <sup>a</sup>   | 79.90 <sup>a</sup>   | 96.56 <sup>a</sup>   | 98.45 <sup>a</sup>  |

Table S3. Chelating properties to samples with thiamine hydrochloride and EGC

| thiamine<br>[mg/100g] | Chelating properties            |                     |                      |                      |        |                      |                      |                      |                      |
|-----------------------|---------------------------------|---------------------|----------------------|----------------------|--------|----------------------|----------------------|----------------------|----------------------|
|                       | Concentrations of EGC [mg/100g] |                     |                      |                      |        |                      |                      |                      |                      |
|                       | 0.04                            | 0.1                 | 0.5                  | 1.0                  | 2.0    | 3.0                  | 4.0                  | 5.0                  | 6.0                  |
| 0                     | 100.00 <sup>f</sup>             | 100.00 <sup>e</sup> | 100.00 <sup>g</sup>  | 100.00 <sup>h</sup>  | 100.00 | 100.00 <sup>f</sup>  | 100.00 <sup>e</sup>  | 100.00 <sup>cb</sup> | 100.04 <sup>b</sup>  |
| 0.01                  | 100.21 <sup>f</sup>             | 100.21 <sup>e</sup> | 100.50 <sup>hg</sup> | 100.08 <sup>h</sup>  | 100.45 | 100.21 <sup>f</sup>  | 100.65 <sup>e</sup>  | 99.87 <sup>b</sup>   | 99.89 <sup>b</sup>   |
| 0.02                  | 100.54 <sup>f</sup>             | 99.98 <sup>e</sup>  | 99.54 <sup>g</sup>   | 100.50 <sup>h</sup>  | 100.35 | 99.91 <sup>f</sup>   | 99.91 <sup>e</sup>   | 100.36 <sup>cb</sup> | 100.07 <sup>b</sup>  |
| 0.04                  | 99.45 <sup>f</sup>              | 100.45 <sup>e</sup> | 100.36 <sup>hg</sup> | 99.65 <sup>h</sup>   | 99.45  | 100.27 <sup>f</sup>  | 100.27 <sup>e</sup>  | 99.45 <sup>b</sup>   | 99.67 <sup>b</sup>   |
| 0.06                  | 99.56 <sup>f</sup>              | 99.78 <sup>e</sup>  | 100.79 <sup>h</sup>  | 100.25 <sup>h</sup>  | 100.32 | 100.54 <sup>f</sup>  | 99.91 <sup>e</sup>   | 100.09 <sup>cb</sup> | 99.07 <sup>ba</sup>  |
| 0.08                  | 100.23 <sup>f</sup>             | 100.54 <sup>e</sup> | 100.21 <sup>hg</sup> | 100.25 <sup>h</sup>  | 100.09 | 99.89 <sup>f</sup>   | 100.54 <sup>e</sup>  | 100.56 <sup>cb</sup> | 99.89 <sup>b</sup>   |
| 0.1                   | 100.21 <sup>f</sup>             | 100.01 <sup>e</sup> | 99.68 <sup>g</sup>   | 99.83 <sup>h</sup>   | 100.32 | 99.96 <sup>f</sup>   | 100.33 <sup>e</sup>  | 100.65 <sup>c</sup>  | 99.60 <sup>b</sup>   |
| 0.2                   | 103.98 <sup>h</sup>             | 103.35 <sup>g</sup> | 102.36 <sup>i</sup>  | 102.36 <sup>ji</sup> | 100.89 | 101.56 <sup>g</sup>  | 100.34 <sup>e</sup>  | 100.98 <sup>c</sup>  | 101.91 <sup>c</sup>  |
| 0.4                   | 104.23 <sup>ih</sup>            | 103.68 <sup>g</sup> | 102.56 <sup>i</sup>  | 102.98 <sup>j</sup>  | 102.59 | 103.05               | 103.89 <sup>h</sup>  | 99.40 <sup>b</sup>   | 101.43 <sup>c</sup>  |
| 0.8                   | 105.03 <sup>ji</sup>            | 104.79 <sup>h</sup> | 102.87 <sup>i</sup>  | 102.45 <sup>ji</sup> | 103.23 | 102.98 <sup>h</sup>  | 102.56 <sup>gf</sup> | 102.56 <sup>ed</sup> | 100.89 <sup>cb</sup> |
| 1.0                   | 105.01 <sup>ji</sup>            | 104.68 <sup>h</sup> | 105.02 <sup>j</sup>  | 103.56 <sup>k</sup>  | 103.98 | 103.89 <sup>ih</sup> | 103.50 <sup>hg</sup> | 102.98 <sup>e</sup>  | 100.20 <sup>b</sup>  |
| 2.0                   | 105.67 <sup>j</sup>             | 105.21 <sup>h</sup> | 105.64 <sup>j</sup>  | 105.45 <sup>l</sup>  | 105.02 | 104.32 <sup>i</sup>  | 104.56 <sup>h</sup>  | 101.86 <sup>d</sup>  | 100.98 <sup>cb</sup> |
| 3.0                   | 102.21 <sup>g</sup>             | 101.98 <sup>f</sup> | 104.89 <sup>j</sup>  | 103.36 <sup>kj</sup> | 104.36 | 103.21 <sup>ih</sup> | 101.98 <sup>f</sup>  | 100.03 <sup>cb</sup> | 100.25 <sup>b</sup>  |
| 4.0                   | 102.11 <sup>g</sup>             | 102.03 <sup>f</sup> | 102.03 <sup>i</sup>  | 101.80 <sup>i</sup>  | 102.79 | 102.34 <sup>hg</sup> | 100.35 <sup>e</sup>  | 100.07 <sup>cb</sup> | 100.35 <sup>b</sup>  |
| 6.0                   | 96.89 <sup>e</sup>              | 97.25 <sup>d</sup>  | 98.56 <sup>f</sup>   | 97.22 <sup>g</sup>   | 99.45  | 100.09 <sup>f</sup>  | 100.23 <sup>e</sup>  | 101.32               | 99.87 <sup>b</sup>   |
| 8.0                   | 96.91 <sup>e</sup>              | 97.09 <sup>d</sup>  | 98.04 <sup>f</sup>   | 97.03 <sup>g</sup>   | 98.23  | 98.21 <sup>e</sup>   | 100.04 <sup>e</sup>  | 100.03 <sup>cb</sup> | 100.02 <sup>b</sup>  |
| 9.0                   | 94.03 <sup>d</sup>              | 94.35 <sup>c</sup>  | 94.21 <sup>e</sup>   | 94.57 <sup>e</sup>   | 95.23  | 95.45 <sup>d</sup>   | 99.98 <sup>e</sup>   | 99.64 <sup>b</sup>   | 98.24 <sup>ba</sup>  |
| 13.5                  | 90.49 <sup>c</sup>              | 91.65 <sup>b</sup>  | 90.19 <sup>d</sup>   | 91.23 <sup>d</sup>   | 91.12  | 90.23 <sup>d</sup>   | 97.25 <sup>d</sup>   | 100.09 <sup>b</sup>  | 99.87 <sup>b</sup>   |
| 16                    | 87.09 <sup>b</sup>              | 87.85 <sup>b</sup>  | 87.04 <sup>c</sup>   | 89.42 <sup>c</sup>   | 88.67  | 88.04 <sup>c</sup>   | 93.45 <sup>c</sup>   | 100.58 <sup>c</sup>  | 99.12 <sup>b</sup>   |
| 18                    | 86.21 <sup>b</sup>              | 85.21 <sup>a</sup>  | 85.23 <sup>b</sup>   | 86.54 <sup>b</sup>   | 87.25  | 86.14 <sup>b</sup>   | 89.19 <sup>b</sup>   | 99.45 <sup>b</sup>   | 98.45 <sup>ba</sup>  |
| 20                    | 84.09 <sup>a</sup>              | 84.23 <sup>a</sup>  | 84.14 <sup>a</sup>   | 84.21 <sup>a</sup>   | 84.32  | 84.56 <sup>a</sup>   | 87.03 <sup>a</sup>   | 98.03 <sup>a</sup>   | 98.16 <sup>a</sup>   |

Table S4. Chelating properties to samples with thiamine pyrophosphate and EGC

| thiamine<br>[mg/100g] | Chelating properties            |                      |                     |                      |                     |                      |                      |                      |                      |
|-----------------------|---------------------------------|----------------------|---------------------|----------------------|---------------------|----------------------|----------------------|----------------------|----------------------|
|                       | Concentrations of EGC [mg/100g] |                      |                     |                      |                     |                      |                      |                      |                      |
|                       | 0.04                            | 0.1                  | 0.5                 | 1.0                  | 2.0                 | 3.0                  | 4.0                  | 5.0                  | 6.0                  |
| 0                     | 100.00 <sup>g</sup>             | 100.00 <sup>f</sup>  | 100.00 <sup>g</sup> | 100.00 <sup>g</sup>  | 100.00 <sup>g</sup> | 100.00 <sup>g</sup>  | 100.00 <sup>f</sup>  | 100.00 <sup>c</sup>  | 100.00 <sup>b</sup>  |
| 0.01                  | 100.67 <sup>hg</sup>            | 100.05 <sup>f</sup>  | 100.50 <sup>g</sup> | 100.08 <sup>g</sup>  | 100.61 <sup>g</sup> | <sup>g</sup>         | 100.00 <sup>f</sup>  | 100.64 <sup>dc</sup> | 99.82 <sup>ba</sup>  |
| 0.02                  | 101.70 <sup>h</sup>             | 101.12 <sup>g</sup>  | 100.07 <sup>g</sup> | 100.50 <sup>g</sup>  | 100.35 <sup>g</sup> | 99.91 <sup>g</sup>   | 99.91 <sup>f</sup>   | 100.36 <sup>dc</sup> | 100.09 <sup>b</sup>  |
| 0.04                  | 100.00 <sup>g</sup>             | 100.05 <sup>f</sup>  | 100.36 <sup>g</sup> | 100.75 <sup>g</sup>  | 100.61 <sup>g</sup> | 100.27 <sup>hg</sup> | 100.27 <sup>gf</sup> | 100.64 <sup>dc</sup> | 100.25 <sup>b</sup>  |
| 0.06                  | 100.21 <sup>g</sup>             | 100.11 <sup>f</sup>  | 99.98 <sup>g</sup>  | 99.85 <sup>g</sup>   | 100.05 <sup>g</sup> | 100.00 <sup>hg</sup> | 99.91 <sup>f</sup>   | 100.09 <sup>c</sup>  | 101.01 <sup>cb</sup> |
| 0.08                  | 100.03 <sup>g</sup>             | 100.03 <sup>f</sup>  | 100.23 <sup>g</sup> | 100.25 <sup>g</sup>  | 100.09 <sup>g</sup> | 100.23 <sup>hg</sup> | 100.03 <sup>gf</sup> | 100.09 <sup>c</sup>  | 100.73 <sup>b</sup>  |
| 0.1                   | 100.05 <sup>g</sup>             | 100.01 <sup>f</sup>  | 99.81 <sup>g</sup>  | 99.96 <sup>g</sup>   | 100.45 <sup>g</sup> | 100.09 <sup>hg</sup> | 100.46 <sup>gf</sup> | 100.78 <sup>d</sup>  | 99.73 <sup>ba</sup>  |
| 0.2                   | 100.72 <sup>hg</sup>            | 102.32 <sup>g</sup>  | 102.50 <sup>h</sup> | 102.27 <sup>h</sup>  | 101.74 <sup>h</sup> | 101.60 <sup>h</sup>  | 101.61 <sup>hg</sup> | 101.32 <sup>ed</sup> | 100.05 <sup>b</sup>  |
| 0.4                   | 104.51 <sup>i</sup>             | 104.07 <sup>h</sup>  | 103.94 <sup>i</sup> | 102.74 <sup>h</sup>  | 104.27 <sup>i</sup> | 103.85 <sup>j</sup>  | 103.28 <sup>j</sup>  | 100.69 <sup>d</sup>  | 100.06 <sup>b</sup>  |
| 0.8                   | 105.72 <sup>k</sup>             | 104.27 <sup>ih</sup> | 104.28 <sup>i</sup> | 104.14 <sup>i</sup>  | 104.32 <sup>i</sup> | 104.74 <sup>k</sup>  | 104.80 <sup>ki</sup> | 103.74 <sup>f</sup>  | 99.89 <sup>ba</sup>  |
| 1.0                   | 105.82 <sup>k</sup>             | 105.71 <sup>i</sup>  | 106.00 <sup>j</sup> | 105.83 <sup>j</sup>  | 105.90 <sup>j</sup> | 105.71 <sup>k</sup>  | 105.09 <sup>k</sup>  | 100.26 <sup>dc</sup> | 100.06 <sup>b</sup>  |
| 2.0                   | 105.30 <sup>kj</sup>            | 105.45 <sup>i</sup>  | 106.21 <sup>j</sup> | 106.78 <sup>j</sup>  | 106.88 <sup>k</sup> | 107.32 <sup>j</sup>  | 106.56 <sup>l</sup>  | 102.02 <sup>e</sup>  | 99.89 <sup>ba</sup>  |
| 3.0                   | 102.24 <sup>i</sup>             | 100.04 <sup>gf</sup> | 104.48 <sup>i</sup> | 102.37 <sup>h</sup>  | 103.32 <sup>i</sup> | 102.70 <sup>i</sup>  | 103.90 <sup>ij</sup> | 100.65 <sup>dc</sup> | 100.45 <sup>b</sup>  |
| 4.0                   | 101.15 <sup>hg</sup>            | 100.78 <sup>gf</sup> | 100.23 <sup>g</sup> | 100.81 <sup>hg</sup> | 101.80 <sup>h</sup> | 100.81 <sup>h</sup>  | 100.94 <sup>g</sup>  | 101.37 <sup>ed</sup> | 101.98 <sup>c</sup>  |
| 6.0                   | 94.96 <sup>e</sup>              | 95.01 <sup>f</sup>   | 95.21 <sup>f</sup>  | 94.96 <sup>f</sup>   | 95.99 <sup>f</sup>  | 96.00 <sup>f</sup>   | 99.63 <sup>f</sup>   | 101.46 <sup>ed</sup> | 100.98 <sup>cb</sup> |
| 8.0                   | 94.96 <sup>f</sup>              | 95.01 <sup>f</sup>   | 95.21 <sup>f</sup>  | 94.96 <sup>f</sup>   | 95.99 <sup>f</sup>  | 96.00 <sup>f</sup>   | 99.63 <sup>f</sup>   | 101.71 <sup>ed</sup> | 101.25 <sup>c</sup>  |
| 9.0                   | 91.54 <sup>e</sup>              | 91.22 <sup>e</sup>   | 91.73 <sup>e</sup>  | 91.07 <sup>e</sup>   | 92.54 <sup>e</sup>  | 92.43 <sup>e</sup>   | 97.54 <sup>e</sup>   | 100.94 <sup>d</sup>  | 100.26               |
| 13.5                  | 86.56 <sup>d</sup>              | 87.45 <sup>d</sup>   | 87.32 <sup>d</sup>  | 87.33 <sup>d</sup>   | 87.53 <sup>d</sup>  | 88.56 <sup>d</sup>   | 89.08 <sup>d</sup>   | 100.74 <sup>c</sup>  | 99.48 <sup>ba</sup>  |
| 16                    | 84.99 <sup>c</sup>              | 84.99 <sup>c</sup>   | 84.62 <sup>c</sup>  | 85.10 <sup>c</sup>   | 85.46 <sup>c</sup>  | 85.88 <sup>c</sup>   | 88.85 <sup>c</sup>   | 100.60 <sup>c</sup>  | 100.24 <sup>b</sup>  |
| 18                    | 82.05 <sup>b</sup>              | 83.00 <sup>b</sup>   | 82.14 <sup>b</sup>  | 83.58 <sup>b</sup>   | 83.11 <sup>b</sup>  | 83.14 <sup>b</sup>   | 85.58 <sup>b</sup>   | 99.57 <sup>b</sup>   | 99.57 <sup>ba</sup>  |
| 20                    | 81.08 <sup>a</sup>              | 81.23 <sup>a</sup>   | 81.11 <sup>a</sup>  | 81.37 <sup>a</sup>   | 80.90 <sup>a</sup>  | 81.47 <sup>a</sup>   | 83.00 <sup>a</sup>   | 98.86 <sup>a</sup>   | 98.97 <sup>a</sup>   |

Table S5. Chelating properties to samples with thiamine hydrochloride and ECG

| thiamine<br>[mg/100g] | Chelating properties            |                      |                      |                      |                      |                      |                      |                      |                      |
|-----------------------|---------------------------------|----------------------|----------------------|----------------------|----------------------|----------------------|----------------------|----------------------|----------------------|
|                       | Concentrations of ECG [mg/100g] |                      |                      |                      |                      |                      |                      |                      |                      |
|                       | 0.04                            | 0.1                  | 0.5                  | 1.0                  | 2.0                  | 3.0                  | 4.0                  | 5.0                  | 6.0                  |
| 0                     | 100.00 <sup>f</sup>             | 100.00 <sup>g</sup>  | 100.00 <sup>g</sup>  | 100.00 <sup>e</sup>  | 100.00 <sup>f</sup>  | 100.00 <sup>g</sup>  | 100.00 <sup>fe</sup> | 100.00 <sup>b</sup>  | 100.04 <sup>dc</sup> |
| 0.01                  | 100.67 <sup>gf</sup>            | 100.05 <sup>g</sup>  | 100.50 <sup>hg</sup> | 100.08 <sup>e</sup>  | 100.61 <sup>gf</sup> | 100.00 <sup>g</sup>  | 100.00 <sup>fe</sup> | 100.64 <sup>cb</sup> | 99.89 <sup>c</sup>   |
| 0.02                  | 101.70 <sup>h</sup>             | 101.12 <sup>h</sup>  | 100.07 <sup>g</sup>  | 100.50 <sup>e</sup>  | 100.35 <sup>gf</sup> | 99.91 <sup>g</sup>   | 99.91 <sup>e</sup>   | 100.36 <sup>cb</sup> | 100.07 <sup>dc</sup> |
| 0.04                  | 100.00 <sup>f</sup>             | 100.05 <sup>hg</sup> | 100.36 <sup>hg</sup> | 100.75 <sup>e</sup>  | 100.61 <sup>hg</sup> | 100.27 <sup>hg</sup> | 100.27 <sup>fe</sup> | 100.64 <sup>e</sup>  | 99.67 <sup>c</sup>   |
| 0.06                  | 100.21 <sup>f</sup>             | 99.89 <sup>g</sup>   | 100.79 <sup>h</sup>  | 100.25 <sup>e</sup>  | 100.09 <sup>f</sup>  | 99.91 <sup>g</sup>   | 99.91 <sup>e</sup>   | 100.09 <sup>b</sup>  | 99.07 <sup>cb</sup>  |
| 0.08                  | 100.23 <sup>f</sup>             | 99.56 <sup>g</sup>   | 100.34 <sup>g</sup>  | 100.25 <sup>e</sup>  | 100.09 <sup>f</sup>  | 100.09 <sup>g</sup>  | 99.89 <sup>e</sup>   | 100.09 <sup>b</sup>  | 99.89 <sup>c</sup>   |
| 0.1                   | 101.56 <sup>hg</sup>            | 100.01 <sup>g</sup>  | 99.68 <sup>g</sup>   | 99.83 <sup>f</sup>   | 100.32 <sup>gh</sup> | 99.96 <sup>g</sup>   | 100.33 <sup>fe</sup> | 100.65 <sup>cb</sup> | 99.60 <sup>c</sup>   |
| 0.2                   | 103.45 <sup>i</sup>             | 103.35 <sup>i</sup>  | 103.69 <sup>i</sup>  | 104.03 <sup>g</sup>  | 102.36 <sup>i</sup>  | 100.93 <sup>ih</sup> | 100.34 <sup>f</sup>  | 100.98 <sup>c</sup>  | 101.91 <sup>f</sup>  |
| 0.4                   | 104.08 <sup>ji</sup>            | 103.68 <sup>i</sup>  | 103.56 <sup>i</sup>  | 104.56 <sup>hg</sup> | 103.25 <sup>i</sup>  | 103.05 <sup>j</sup>  | 103.89 <sup>h</sup>  | 100.25 <sup>cb</sup> | 101.43 <sup>e</sup>  |
| 0.8                   | 104.98 <sup>kj</sup>            | 104.79 <sup>j</sup>  | 100.55 <sup>hg</sup> | 101.76 <sup>f</sup>  | 103.23 <sup>i</sup>  | 102.98 <sup>ij</sup> | 102.56 <sup>g</sup>  | 100.15 <sup>b</sup>  | 100.89 <sup>ed</sup> |
| 1.0                   | 104.86 <sup>j</sup>             | 104.68 <sup>j</sup>  | 105.02 <sup>j</sup>  | 101.67 <sup>f</sup>  | 101.00 <sup>h</sup>  | 102.98 <sup>j</sup>  | 103.50 <sup>h</sup>  | 102.35 <sup>ed</sup> | 100.20 <sup>dc</sup> |
| 2.0                   | 105.67 <sup>k</sup>             | 105.45 <sup>j</sup>  | 106.02 <sup>j</sup>  | 105.09 <sup>h</sup>  | 104.89 <sup>j</sup>  | 104.68 <sup>k</sup>  | 102.56 <sup>g</sup>  | 101.86 <sup>d</sup>  | 100.98 <sup>ed</sup> |
| 3.0                   | 103.23 <sup>i</sup>             | 101.03 <sup>h</sup>  | 103.98 <sup>i</sup>  | 103.36 <sup>g</sup>  | 104.36 <sup>j</sup>  | 103.33 <sup>j</sup>  | 102.22 <sup>g</sup>  | 101.01 <sup>dc</sup> | 100.32 <sup>dc</sup> |
| 4.0                   | 102.14 <sup>h</sup>             | 101.77 <sup>h</sup>  | 101.22 <sup>h</sup>  | 101.80 <sup>f</sup>  | 102.79 <sup>i</sup>  | 101.80 <sup>i</sup>  | 101.93 <sup>g</sup>  | 102.36 <sup>ed</sup> | 101.85 <sup>ef</sup> |
| 6.0                   | 96.93 <sup>e</sup>              | 96.98 <sup>f</sup>   | 97.18 <sup>f</sup>   | 96.93 <sup>e</sup>   | 97.96 <sup>e</sup>   | 97.97 <sup>f</sup>   | 101.60 <sup>g</sup>  | 102.45 <sup>e</sup>  | 100.03 <sup>dc</sup> |
| 8.0                   | 96.93 <sup>e</sup>              | 96.98 <sup>f</sup>   | 97.18 <sup>f</sup>   | 96.93 <sup>e</sup>   | 97.96 <sup>f</sup>   | 97.97 <sup>f</sup>   | 100.03 <sup>e</sup>  | 102.70 <sup>e</sup>  | 99.58 <sup>c</sup>   |
| 9.0                   | 93.51 <sup>d</sup>              | 93.19 <sup>e</sup>   | 93.70 <sup>e</sup>   | 93.04 <sup>e</sup>   | 94.51 <sup>e</sup>   | 94.40 <sup>e</sup>   | 99.51 <sup>e</sup>   | 101.93 <sup>d</sup>  | 99.45 <sup>cb</sup>  |
| 13.5                  | 90.56 <sup>c</sup>              | 90.23 <sup>d</sup>   | 89.98 <sup>d</sup>   | 90.03 <sup>d</sup>   | 90.10 <sup>d</sup>   | 89.98 <sup>d</sup>   | 91.05 <sup>d</sup>   | 100.21 <sup>cb</sup> | 98.25 <sup>a</sup>   |
| 16                    | 86.96 <sup>b</sup>              | 86.96 <sup>c</sup>   | 86.59 <sup>c</sup>   | 87.07 <sup>c</sup>   | 87.43 <sup>c</sup>   | 87.85 <sup>c</sup>   | 90.82 <sup>c</sup>   | 100.98 <sup>c</sup>  | 99.12 <sup>cb</sup>  |
| 18                    | 84.02 <sup>a</sup>              | 84.95 <sup>b</sup>   | 84.98 <sup>b</sup>   | 85.55 <sup>b</sup>   | 85.08 <sup>b</sup>   | 85.11 <sup>b</sup>   | 87.55 <sup>b</sup>   | 100.56 <sup>cb</sup> | 98.54 <sup>ba</sup>  |
| 20                    | 83.05 <sup>a</sup>              | 83.45 <sup>a</sup>   | 83.56 <sup>a</sup>   | 83.07 <sup>a</sup>   | 83.56 <sup>a</sup>   | 83.07 <sup>a</sup>   | 84.97 <sup>a</sup>   | 97.98 <sup>a</sup>   | 98.12 <sup>a</sup>   |

Table S6. Chelating properties to samples with thiamine pyrophosphate and ECG

| thiamine<br>[mg/100g] | Chelating properties            |                      |                      |                      |                      |                      |                      |                      |                      |
|-----------------------|---------------------------------|----------------------|----------------------|----------------------|----------------------|----------------------|----------------------|----------------------|----------------------|
|                       | Concentrations of ECG [mg/100g] |                      |                      |                      |                      |                      |                      |                      |                      |
|                       | 0.04                            | 0.1                  | 0.5                  | 1.0                  | 2.0                  | 3.0                  | 4.0                  | 5.0                  | 6.0                  |
| 0                     | 100.00 <sup>g</sup>             | 100.00 <sup>f</sup>  | 100.00 <sup>g</sup>  | 100.00 <sup>g</sup>  | 100.00 <sup>h</sup>  | 100.00 <sup>g</sup>  | 100.00 <sup>f</sup>  | 100.00 <sup>c</sup>  | 100.00 <sup>c</sup>  |
| 0.01                  | 100.67 <sup>g</sup>             | 100.05 <sup>f</sup>  | 100.50 <sup>hg</sup> | 100.08 <sup>g</sup>  | 100.61 <sup>ih</sup> | 100.00 <sup>g</sup>  | 100.00 <sup>f</sup>  | 100.64               | 99.82 <sup>c</sup>   |
| 0.02                  | 101.70 <sup>h</sup>             | 101.12 <sup>g</sup>  | 100.07 <sup>g</sup>  | 100.50 <sup>hg</sup> | 100.35 <sup>h</sup>  | 99.91 <sup>g</sup>   | 99.91 <sup>f</sup>   | 100.36 <sup>dc</sup> | 100.09 <sup>dc</sup> |
| 0.04                  | 100.00 <sup>g</sup>             | 100.05 <sup>e</sup>  | 100.36 <sup>hg</sup> | 100.75 <sup>hg</sup> | 100.61 <sup>ih</sup> | 100.27 <sup>hg</sup> | 100.27 <sup>gf</sup> | 100.64 <sup>dc</sup> | 100.25 <sup>dc</sup> |
| 0.06                  | 100.21 <sup>g</sup>             | 100.11 <sup>e</sup>  | 99.98 <sup>g</sup>   | 99.85 <sup>g</sup>   | 100.05 <sup>h</sup>  | 100.02 <sup>g</sup>  | 99.91 <sup>f</sup>   | 100.09 <sup>c</sup>  | 101.01 <sup>ed</sup> |
| 0.08                  | 100.03 <sup>g</sup>             | 100.03 <sup>e</sup>  | 100.23 <sup>hg</sup> | 100.25               | 100.09 <sup>h</sup>  | 100.23 <sup>hg</sup> | 100.03 <sup>f</sup>  | 100.09 <sup>c</sup>  | 100.73 <sup>d</sup>  |
| 0.1                   | 100.05 <sup>g</sup>             | 100.01 <sup>e</sup>  | 99.81 <sup>g</sup>   | 99.96 <sup>g</sup>   | 100.45 <sup>ih</sup> | 100.09 <sup>g</sup>  | 100.46 <sup>gf</sup> | 100.78 <sup>dc</sup> | 99.73 <sup>c</sup>   |
| 0.2                   | 100.87 <sup>hg</sup>            | 102.47 <sup>h</sup>  | 102.65 <sup>i</sup>  | 102.42 <sup>i</sup>  | 101.89 <sup>ji</sup> | 101.75 <sup>i</sup>  | 101.76 <sup>ih</sup> | 101.47 <sup>d</sup>  | 100.05 <sup>c</sup>  |
| 0.4                   | 104.73 <sup>i</sup>             | 104.22 <sup>i</sup>  | 104.09 <sup>j</sup>  | 102.89 <sup>i</sup>  | 104.42 <sup>k</sup>  | 104.00 <sup>k</sup>  | 103.43 <sup>j</sup>  | 100.84 <sup>d</sup>  | 100.06 <sup>c</sup>  |
| 0.8                   | 105.87 <sup>j</sup>             | 104.21 <sup>i</sup>  | 104.43 <sup>kj</sup> | 104.29 <sup>j</sup>  | 104.47 <sup>k</sup>  | 104.89 <sup>lk</sup> | 104.95 <sup>k</sup>  | 103.89 <sup>e</sup>  | 99.89 <sup>c</sup>   |
| 1.0                   | 105.97 <sup>ki</sup>            | 105.89 <sup>kj</sup> | 106.15 <sup>l</sup>  | 105.98 <sup>k</sup>  | 105.58 <sup>l</sup>  | 105.67 <sup>l</sup>  | 105.48 <sup>k</sup>  | 104.86 <sup>f</sup>  | 100.06 <sup>dc</sup> |
| 2.0                   | 106.89 <sup>k</sup>             | 106.79 <sup>k</sup>  | 106.47 <sup>ml</sup> | 106.93 <sup>l</sup>  | 107.00 <sup>m</sup>  | 106.65 <sup>m</sup>  | 107.09 <sup>l</sup>  | 106.21 <sup>g</sup>  | 99.89 <sup>c</sup>   |
| 3.0                   | 103.99 <sup>i</sup>             | 105.42 <sup>j</sup>  | 105.33 <sup>lk</sup> | 104.89 <sup>j</sup>  | 103.67 <sup>k</sup>  | 103.09 <sup>j</sup>  | 102.47 <sup>i</sup>  | 103.67 <sup>e</sup>  | 100.45 <sup>dc</sup> |
| 4.0                   | 101.15 <sup>hg</sup>            | 101.15 <sup>g</sup>  | 101.15 <sup>h</sup>  | 101.15 <sup>h</sup>  | 101.15 <sup>i</sup>  | 101.15 <sup>ih</sup> | 101.15 <sup>hg</sup> | 101.15 <sup>d</sup>  | 101.98 <sup>e</sup>  |
| 6.0                   | 93.97 <sup>f</sup>              | 94.02 <sup>e</sup>   | 94.22 <sup>f</sup>   | 93.97 <sup>f</sup>   | 95.00 <sup>g</sup>   | 95.01 <sup>f</sup>   | 98.64 <sup>e</sup>   | 100.98 <sup>d</sup>  | 99.56 <sup>c</sup>   |
| 8.0                   | 93.97 <sup>f</sup>              | 94.02 <sup>e</sup>   | 94.22 <sup>f</sup>   | 93.97 <sup>f</sup>   | 95.00 <sup>g</sup>   | 95.01 <sup>f</sup>   | 98.64 <sup>e</sup>   | 99.78 <sup>c</sup>   | 98.45 <sup>c</sup>   |
| 9.0                   | 90.55 <sup>e</sup>              | 90.23 <sup>e</sup>   | 90.74 <sup>e</sup>   | 90.08 <sup>e</sup>   | 91.55 <sup>f</sup>   | 91.44 <sup>e</sup>   | 96.55 <sup>d</sup>   | 100.94 <sup>d</sup>  | 100.24 <sup>dc</sup> |
| 13.5                  | 85.57 <sup>d</sup>              | 86.46 <sup>d</sup>   | 86.33 <sup>d</sup>   | 86.34 <sup>d</sup>   | 86.54 <sup>e</sup>   | 87.57 <sup>d</sup>   | 88.09 <sup>c</sup>   | 98.56 <sup>b</sup>   | 99.45 <sup>c</sup>   |
| 16                    | 84.00 <sup>c</sup>              | 84.00 <sup>c</sup>   | 83.63 <sup>c</sup>   | 84.11 <sup>c</sup>   | 84.47 <sup>cd</sup>  | 84.89 <sup>c</sup>   | 87.86 <sup>c</sup>   | 98.12 <sup>b</sup>   | 98.78 <sup>cb</sup>  |
| 18                    | 81.06 <sup>b</sup>              | 82.01 <sup>b</sup>   | 81.15 <sup>b</sup>   | 82.59 <sup>b</sup>   | 82.12 <sup>b</sup>   | 82.15 <sup>b</sup>   | 84.59 <sup>b</sup>   | 98.03 <sup>b</sup>   | 98.56 <sup>b</sup>   |
| 20                    | 80.09 <sup>g</sup>              | 80.24 <sup>a</sup>   | 80.12 <sup>a</sup>   | 80.38 <sup>a</sup>   | 79.91 <sup>a</sup>   | 80.48 <sup>a</sup>   | 82.01 <sup>a</sup>   | 97.12 <sup>a</sup>   | 97.98 <sup>a</sup>   |

Table S7. Chelating properties to samples with thiamine hydrochloride and caffeine

| thiamine<br>[mg/100g] | Chelating properties                 |                      |                      |                      |                      |                      |                      |                      |                      |
|-----------------------|--------------------------------------|----------------------|----------------------|----------------------|----------------------|----------------------|----------------------|----------------------|----------------------|
|                       | Concentrations of caffeine [mg/100g] |                      |                      |                      |                      |                      |                      |                      |                      |
|                       | 0.04                                 | 0.1                  | 0.5                  | 1.0                  | 2.0                  | 3.0                  | 4.0                  | 5.0                  | 6.0                  |
| 0                     | 100.00 <sup>f</sup>                  | 100.00 <sup>h</sup>  | 100.00 <sup>gf</sup> | 100.00 <sup>g</sup>  | 100.00 <sup>fe</sup> | 100.00 <sup>ed</sup> | 100.00 <sup>dc</sup> | 100.00 <sup>cb</sup> | 100.03 <sup>c</sup>  |
| 0.01                  | 100.67 <sup>g</sup>                  | 100.05 <sup>h</sup>  | 100.50 <sup>g</sup>  | 100.08 <sup>gf</sup> | 100.61 <sup>e</sup>  | 100.00 <sup>ed</sup> | 100.00 <sup>dc</sup> | 100.64 <sup>dc</sup> | 99.67 <sup>cb</sup>  |
| 0.02                  | 101.70 <sup>h</sup>                  | 100.20 <sup>h</sup>  | 99.76 <sup>f</sup>   | 100.50 <sup>gf</sup> | 100.35 <sup>fe</sup> | 99.91 <sup>d</sup>   | 99.56 <sup>c</sup>   | 100.36 <sup>c</sup>  | 99.89 <sup>cb</sup>  |
| 0.04                  | 100.00 <sup>f</sup>                  | 100.05 <sup>h</sup>  | 100.36 <sup>gf</sup> | 100.75 <sup>hg</sup> | 100.61               | 100.27 <sup>ed</sup> | 100.27 <sup>dc</sup> | 100.64 <sup>dc</sup> | 99.98 <sup>cb</sup>  |
| 0.06                  | 99.89 <sup>fe</sup>                  | 101.83 <sup>i</sup>  | 100.79 <sup>g</sup>  | 100.25 <sup>gf</sup> | 99.45 <sup>e</sup>   | 99.91 <sup>d</sup>   | 99.91 <sup>c</sup>   | 100.09 <sup>cb</sup> | 100.56 <sup>dc</sup> |
| 0.08                  | 100.04 <sup>f</sup>                  | 100.04 <sup>h</sup>  | 100.78 <sup>g</sup>  | 100.25 <sup>gf</sup> | 100.09 <sup>fe</sup> | 101.54 <sup>f</sup>  | 99.98 <sup>c</sup>   | 100.09 <sup>cb</sup> | 100.01 <sup>c</sup>  |
| 0.1                   | 99.98 <sup>f</sup>                   | 99.76 <sup>hg</sup>  | 99.45 <sup>f</sup>   | 100.04 <sup>gf</sup> | 99.56 <sup>e</sup>   | 100.23 <sup>ed</sup> | 100.09 <sup>dc</sup> | 100.04 <sup>cb</sup> | 100.06 <sup>c</sup>  |
| 0.2                   | 100.09 <sup>f</sup>                  | 100.05 <sup>h</sup>  | 99.89 <sup>f</sup>   | 100.00 <sup>f</sup>  | 99.80 <sup>e</sup>   | 99.78 <sup>d</sup>   | 100.89 <sup>d</sup>  | 100.27 <sup>c</sup>  | 100.09 <sup>c</sup>  |
| 0.4                   | 99.98 <sup>f</sup>                   | 99.78 <sup>hg</sup>  | 99.89 <sup>f</sup>   | 100.56 <sup>g</sup>  | 100.47 <sup>fe</sup> | 100.89 <sup>e</sup>  | 100.86 <sup>d</sup>  | 99.67 <sup>cb</sup>  | 100.09 <sup>c</sup>  |
| 0.8                   | 101.45 <sup>hg</sup>                 | 100.78 <sup>h</sup>  | 99.85 <sup>f</sup>   | 100.45 <sup>gf</sup> | 99.78 <sup>e</sup>   | 99.67 <sup>d</sup>   | 99.56 <sup>c</sup>   | 99.03 <sup>b</sup>   | 99.37 <sup>b</sup>   |
| 1.0                   | 102.34 <sup>ih</sup>                 | 102.98 <sup>j</sup>  | 100.89 <sup>hg</sup> | 101.34 <sup>h</sup>  | 100.05 <sup>fe</sup> | 99.78 <sup>d</sup>   | 95.27 <sup>a</sup>   | 100.91 <sup>ed</sup> | 99.73 <sup>cb</sup>  |
| 2.0                   | 104.78 <sup>j</sup>                  | 104.56 <sup>k</sup>  | 103.03 <sup>i</sup>  | 102.56 <sup>i</sup>  | 100.99 <sup>gf</sup> | 101.34 <sup>fe</sup> | 102.56 <sup>f</sup>  | 101.47 <sup>e</sup>  | 102.81 <sup>e</sup>  |
| 3.0                   | 100.78 <sup>g</sup>                  | 103.67 <sup>kj</sup> | 103.78 <sup>i</sup>  | 103.98 <sup>j</sup>  | 101.67 <sup>g</sup>  | 101.67 <sup>f</sup>  | 100.87 <sup>ed</sup> | 102.97 <sup>f</sup>  | 104.37 <sup>f</sup>  |
| 4.0                   | 100.07 <sup>gf</sup>                 | 99.78 <sup>hg</sup>  | 101.45 <sup>h</sup>  | 102.45 <sup>i</sup>  | 103.45 <sup>h</sup>  | 99.87 <sup>d</sup>   | 101.77 <sup>fe</sup> | 100.78 <sup>dc</sup> | 103.67 <sup>fe</sup> |
| 6.0                   | 98.94 <sup>e</sup>                   | 99.01 <sup>g</sup>   | 100.56 <sup>g</sup>  | 100.45 <sup>gf</sup> | 100.47 <sup>fe</sup> | 100.45 <sup>ed</sup> | 100.67 <sup>d</sup>  | 100.67 <sup>dc</sup> | 100.92 <sup>dc</sup> |
| 8.0                   | 99.34 <sup>fe</sup>                  | 96.66 <sup>f</sup>   | 97.68 <sup>e</sup>   | 99.67 <sup>f</sup>   | 99.69 <sup>e</sup>   | 100.56 <sup>ed</sup> | 99.89 <sup>c</sup>   | 100.91 <sup>ed</sup> | 104.07               |
| 9.0                   | 95.08 <sup>d</sup>                   | 94.57 <sup>e</sup>   | 95.09 <sup>d</sup>   | 95.13 <sup>e</sup>   | 99.77 <sup>e</sup>   | 100.59 <sup>ed</sup> | 100.45 <sup>dc</sup> | 100.56 <sup>dc</sup> | 100.56 <sup>dc</sup> |
| 13.5                  | 92.22 <sup>c</sup>                   | 91.59 <sup>d</sup>   | 92.11 <sup>c</sup>   | 92.15 <sup>d</sup>   | 92.57 <sup>d</sup>   | 95.66 <sup>c</sup>   | 101.23 <sup>e</sup>  | 102.35               | 98.98 <sup>ba</sup>  |
| 16                    | 86.98 <sup>b</sup>                   | 86.45 <sup>c</sup>   | 86.12 <sup>b</sup>   | 87.03 <sup>c</sup>   | 88.94 <sup>c</sup>   | 93.45 <sup>b</sup>   | 99.89 <sup>c</sup>   | 99.56 <sup>b</sup>   | 98.75 <sup>ba</sup>  |
| 18                    | 83.32 <sup>a</sup>                   | 81.87 <sup>a</sup>   | 84.45 <sup>a</sup>   | 85.98 <sup>b</sup>   | 86.39 <sup>b</sup>   | 90.21 <sup>a</sup>   | 95.12 <sup>a</sup>   | 99.78 <sup>cb</sup>  | 98.21 <sup>a</sup>   |
| 20                    | 83.56 <sup>a</sup>                   | 83.59 <sup>b</sup>   | 83.69 <sup>a</sup>   | 84.45 <sup>a</sup>   | 85.03 <sup>a</sup>   | 90.23 <sup>a</sup>   | 98.56 <sup>b</sup>   | 97.24 <sup>a</sup>   | 98.75 <sup>ba</sup>  |

Table S8. Chelating properties to samples with thiamine pyrophosphate and caffeine

| thiamine<br>[mg/100g] | Chelating properties                 |                      |                      |                      |                      |                      |                      |                      |                      |
|-----------------------|--------------------------------------|----------------------|----------------------|----------------------|----------------------|----------------------|----------------------|----------------------|----------------------|
|                       | Concentrations of caffeine [mg/100g] |                      |                      |                      |                      |                      |                      |                      |                      |
|                       | 0.04                                 | 0.1                  | 0.5                  | 1.0                  | 2.0                  | 3.0                  | 4.0                  | 5.0                  | 6.0                  |
| 0                     | 100.00 <sup>f</sup>                  | 100.00 <sup>h</sup>  | 100.00 <sup>gf</sup> | 100.00 <sup>g</sup>  | 100.00 <sup>f</sup>  | 100.00 <sup>ed</sup> | 100.00 <sup>d</sup>  | 100.00 <sup>ba</sup> | 100.00 <sup>c</sup>  |
| 0.01                  | 100.67 <sup>gf</sup>                 | 100.05 <sup>h</sup>  | 100.50 <sup>gf</sup> | 100.08 <sup>g</sup>  | 100.61 <sup>gf</sup> | 100.00 <sup>ed</sup> | 100.00 <sup>d</sup>  | 100.64 <sup>cb</sup> | 99.67 <sup>cb</sup>  |
| 0.02                  | 101.70 <sup>ih</sup>                 | 100.20 <sup>ih</sup> | 99.76 <sup>f</sup>   | 100.50 <sup>hg</sup> | 100.35 <sup>gf</sup> | 99.91 <sup>ed</sup>  | 99.56 <sup>dc</sup>  | 100.36 <sup>b</sup>  | 99.89 <sup>cb</sup>  |
| 0.04                  | 100.00 <sup>f</sup>                  | 100.05 <sup>h</sup>  | 100.36 <sup>gf</sup> | 100.75 <sup>hg</sup> | 100.61 <sup>gf</sup> | 100.27 <sup>e</sup>  | 100.27 <sup>d</sup>  | 100.64 <sup>cb</sup> | 99.98 <sup>cb</sup>  |
| 0.06                  | 99.89 <sup>f</sup>                   | 101.83 <sup>k</sup>  | 100.79 <sup>g</sup>  | 100.25 <sup>g</sup>  | 99.45 <sup>fe</sup>  | 99.91 <sup>ed</sup>  | 99.91 <sup>dc</sup>  | 100.09 <sup>b</sup>  | 100.56 <sup>dc</sup> |
| 0.08                  | 100.04 <sup>f</sup>                  | 100.04 <sup>h</sup>  | 100.78 <sup>hg</sup> | 100.25 <sup>g</sup>  | 100.09 <sup>f</sup>  | 101.54 <sup>f</sup>  | 99.98 <sup>dc</sup>  | 100.09 <sup>b</sup>  | 100.01 <sup>c</sup>  |
| 0.1                   | 99.98 <sup>f</sup>                   | 99.76 <sup>h</sup>   | 99.45 <sup>f</sup>   | 100.04 <sup>g</sup>  | 99.56 <sup>fe</sup>  | 100.23 <sup>e</sup>  | 100.09 <sup>d</sup>  | 100.21 <sup>b</sup>  | 100.06 <sup>c</sup>  |
| 0.2                   | 100.09 <sup>f</sup>                  | 100.05 <sup>h</sup>  | 99.89 <sup>f</sup>   | 100.00 <sup>g</sup>  | 99.80 <sup>f</sup>   | 99.78 <sup>ed</sup>  | 100.89 <sup>ed</sup> | 100.06 <sup>b</sup>  | 100.09 <sup>dc</sup> |
| 0.4                   | 99.98 <sup>f</sup>                   | 99.78 <sup>h</sup>   | 99.89 <sup>f</sup>   | 100.56 <sup>hg</sup> | 100.47 <sup>gf</sup> | 100.21 <sup>ed</sup> | 99.45 <sup>dc</sup>  | 99.65 <sup>ba</sup>  | 100.09 <sup>dc</sup> |
| 0.8                   | 101.45 <sup>hg</sup>                 | 100.78 <sup>ji</sup> | 99.85 <sup>f</sup>   | 100.45 <sup>hg</sup> | 99.78 <sup>fe</sup>  | 99.67 <sup>ed</sup>  | 99.56 <sup>dc</sup>  | 99.03 <sup>a</sup>   | 100.02 <sup>c</sup>  |
| 1.0                   | 102.34 <sup>i</sup>                  | 102.98 <sup>l</sup>  | 100.89 <sup>hg</sup> | 101.34 <sup>h</sup>  | 100.05 <sup>f</sup>  | 100.35 <sup>e</sup>  | 95.2 <sup>a</sup>    | 100.91 <sup>cb</sup> | 100.03 <sup>c</sup>  |
| 2.0                   | 104.78 <sup>j</sup>                  | 104.56 <sup>m</sup>  | 103.03 <sup>j</sup>  | 102.56 <sup>i</sup>  | 100.99 <sup>g</sup>  | 101.34 <sup>f</sup>  | 102.56 <sup>f</sup>  | 101.47 <sup>dc</sup> | 101.54 <sup>ed</sup> |
| 3.0                   | 100.08 <sup>f</sup>                  | 100.32 <sup>ih</sup> | 102.21 <sup>ji</sup> | 103.98 <sup>j</sup>  | 102.35 <sup>h</sup>  | 101.67 <sup>f</sup>  | 100.03 <sup>d</sup>  | 99.65 <sup>ba</sup>  | 100.23 <sup>c</sup>  |
| 4.0                   | 100.05 <sup>f</sup>                  | 99.78 <sup>h</sup>   | 101.45 <sup>ih</sup> | 102.45 <sup>i</sup>  | 103.45 <sup>i</sup>  | 99.87 <sup>ed</sup>  | 101.77 <sup>e</sup>  | 100.78 <sup>cb</sup> | 99.89 <sup>cb</sup>  |
| 6.0                   | 97.96 <sup>e</sup>                   | 98.03 <sup>g</sup>   | 99.58 <sup>f</sup>   | 99.47 <sup>gf</sup>  | 99.49 <sup>fe</sup>  | 99.47 <sup>d</sup>   | 100.23 <sup>ed</sup> | 100.32 <sup>cb</sup> | 100.92 <sup>dc</sup> |
| 8.0                   | 98.41 <sup>e</sup>                   | 95.68 <sup>f</sup>   | 96.70 <sup>e</sup>   | 98.69 <sup>f</sup>   | 99.03 <sup>e</sup>   | 99.58 <sup>d</sup>   | 98.91 <sup>c</sup>   | 99.93 <sup>ba</sup>  | 104.07 <sup>f</sup>  |
| 9.0                   | 94.10 <sup>d</sup>                   | 93.45 <sup>e</sup>   | 95.03 <sup>d</sup>   | 94.15 <sup>e</sup>   | 98.79 <sup>e</sup>   | 99.61 <sup>d</sup>   | 99.47 <sup>dc</sup>  | 99.58 <sup>ba</sup>  | 100.56 <sup>dc</sup> |
| 13.5                  | 91.23 <sup>c</sup>                   | 90.61 <sup>d</sup>   | 91.13 <sup>c</sup>   | 91.17 <sup>d</sup>   | 91.59 <sup>d</sup>   | 94.68 <sup>c</sup>   | 100.25               | 100.32 <sup>cb</sup> | 98.98 <sup>ba</sup>  |
| 16                    | 87.03 <sup>b</sup>                   | 85.47 <sup>c</sup>   | 85.14 <sup>b</sup>   | 86.05 <sup>c</sup>   | 87.96 <sup>c</sup>   | 92.56 <sup>b</sup>   | 98.91 <sup>c</sup>   | 102.03 <sup>ed</sup> | 98.75 <sup>a</sup>   |
| 18                    | 82.39 <sup>a</sup>                   | 80.89 <sup>a</sup>   | 83.24 <sup>a</sup>   | 85.12 <sup>b</sup>   | 85.64 <sup>b</sup>   | 89.23 <sup>a</sup>   | 97.03 <sup>b</sup>   | 102.45 <sup>e</sup>  | 98.21 <sup>a</sup>   |
| 20                    | 82.58 <sup>a</sup>                   | 82.61 <sup>b</sup>   | 82.71 <sup>a</sup>   | 83.47 <sup>a</sup>   | 84.05 <sup>a</sup>   | 89.25 <sup>a</sup>   | 97.51 <sup>b</sup>   | 100.32 <sup>cb</sup> | 98.75 <sup>a</sup>   |



Table S9. Reducing power to samples with thiamine hydrochloride and EGCG

| thiamine<br>[mg/100g] | Reducing power                   |                      |                      |                      |                      |                      |                      |                      |                     |
|-----------------------|----------------------------------|----------------------|----------------------|----------------------|----------------------|----------------------|----------------------|----------------------|---------------------|
|                       | Concentrations of EGCG [mg/100g] |                      |                      |                      |                      |                      |                      |                      |                     |
|                       | 0.04                             | 0.1                  | 0.5                  | 1.0                  | 2.0                  | 3.0                  | 4.0                  | 5.0                  | 6.0                 |
| 0                     | 100.00 <sup>g</sup>              | 100.00 <sup>f</sup>  | 100.00 <sup>f</sup>  | 100.00 <sup>g</sup>  | 100.00 <sup>hg</sup> | 100.00 <sup>hg</sup> | 100.00 <sup>hg</sup> | 100.00 <sup>d</sup>  | 100.00 <sup>b</sup> |
| 0.01                  | 99.58 <sup>g</sup>               | 100.12 <sup>gf</sup> | 100.21 <sup>f</sup>  | 100.98 <sup>h</sup>  | 100.25 <sup>hg</sup> | 99.87 <sup>hg</sup>  | 100.56 <sup>h</sup>  | 100.00 <sup>d</sup>  | 100.24 <sup>b</sup> |
| 0.02                  | 99.89 <sup>g</sup>               | 99.89 <sup>f</sup>   | 100.35 <sup>f</sup>  | 100.54 <sup>hg</sup> | 99.45 <sup>g</sup>   | 100.35 <sup>hg</sup> | 100.45 <sup>h</sup>  | 99.89 <sup>d</sup>   | 100.54 <sup>b</sup> |
| 0.04                  | 100.26 <sup>hg</sup>             | 99.45 <sup>f</sup>   | 99.89 <sup>f</sup>   | 99.87 <sup>g</sup>   | 100.89 <sup>h</sup>  | 100.22 <sup>hg</sup> | 100.89 <sup>h</sup>  | 99.45 <sup>d</sup>   | 100.65 <sup>b</sup> |
| 0.06                  | 100.09 <sup>g</sup>              | 100.35 <sup>gf</sup> | 100.13 <sup>f</sup>  | 100.45 <sup>h</sup>  | 100.65 <sup>h</sup>  | 100.45               | 99.45 <sup>g</sup>   | 100.25 <sup>ed</sup> | 99.45 <sup>ba</sup> |
| 0.08                  | 100.03 <sup>g</sup>              | 100.09 <sup>f</sup>  | 100.45 <sup>f</sup>  | 101.54               | 100.98 <sup>h</sup>  | 100.87 <sup>h</sup>  | 100.14 <sup>gh</sup> | 100.34 <sup>ed</sup> | 100.54 <sup>b</sup> |
| 0.1                   | 101.12 <sup>h</sup>              | 101.13 <sup>g</sup>  | 100.44 <sup>f</sup>  | 100.33 <sup>hg</sup> | 100.09 <sup>hg</sup> | 100.01 <sup>hg</sup> | 100.97 <sup>ih</sup> | 99.97 <sup>d</sup>   | 100.16 <sup>b</sup> |
| 0.2                   | 103.12 <sup>i</sup>              | 102.35 <sup>h</sup>  | 103.56 <sup>ih</sup> | 102.45 <sup>ji</sup> | 102.45 <sup>ji</sup> | 102.39 <sup>i</sup>  | 101.98 <sup>j</sup>  | 100.56 <sup>ed</sup> | 100.09 <sup>b</sup> |
| 0.4                   | 102.44 <sup>i</sup>              | 104.43 <sup>kj</sup> | 102.73 <sup>hg</sup> | 101.77 <sup>i</sup>  | 103.12 <sup>kj</sup> | 102.90 <sup>i</sup>  | 101.94 <sup>j</sup>  | 101.03 <sup>fe</sup> | 100.09 <sup>b</sup> |
| 0.8                   | 106.19 <sup>j</sup>              | 105.11 <sup>lk</sup> | 102.66 <sup>g</sup>  | 102.33 <sup>ji</sup> | 102.20 <sup>i</sup>  | 102.77 <sup>i</sup>  | 102.33 <sup>j</sup>  | 100.77 <sup>ed</sup> | 100.36 <sup>b</sup> |
| 1.0                   | 105.86 <sup>j</sup>              | 105.86 <sup>ml</sup> | 103.91 <sup>i</sup>  | 103.66 <sup>j</sup>  | 103.56 <sup>k</sup>  | 102.23 <sup>i</sup>  | 102.03 <sup>j</sup>  | 100.91 <sup>e</sup>  | 100.13 <sup>b</sup> |
| 2.0                   | 106.33 <sup>j</sup>              | 106.29 <sup>m</sup>  | 105.86 <sup>j</sup>  | 105.56 <sup>k</sup>  | 105.03 <sup>l</sup>  | 104.71 <sup>j</sup>  | 103.98 <sup>k</sup>  | 101.31 <sup>f</sup>  | 100.25 <sup>b</sup> |
| 3.0                   | 104.12                           | 104.11 <sup>ji</sup> | 103.65 <sup>ih</sup> | 103.41 <sup>ji</sup> | 103.51 <sup>jk</sup> | 102.10 <sup>i</sup>  | 102.41 <sup>j</sup>  | 101.10 <sup>fe</sup> | 100.08 <sup>b</sup> |
| 4.0                   | 103.11 <sup>i</sup>              | 103.41 <sup>i</sup>  | 102.99 <sup>g</sup>  | 103.08 <sup>ji</sup> | 102.96 <sup>ji</sup> | 102.18 <sup>i</sup>  | 101.11 <sup>ij</sup> | 100.85 <sup>e</sup>  | 100.32 <sup>b</sup> |
| 6.0                   | 100.11 <sup>g</sup>              | 100.26 <sup>gf</sup> | 100.10 <sup>f</sup>  | 100.32 <sup>g</sup>  | 99.74 <sup>g</sup>   | 99.32 <sup>g</sup>   | 100.12 <sup>hg</sup> | 99.43 <sup>d</sup>   | 100.09 <sup>b</sup> |
| 8.0                   | 98.75 <sup>f</sup>               | 99.89 <sup>f</sup>   | 89.78 <sup>e</sup>   | 94.86 <sup>f</sup>   | 94.74 <sup>f</sup>   | 94.85 <sup>f</sup>   | 96.74 <sup>f</sup>   | 99.65 <sup>d</sup>   | 99.85 <sup>b</sup>  |
| 9.0                   | 90.72 <sup>e</sup>               | 90.65 <sup>e</sup>   | 90.62 <sup>e</sup>   | 90.08 <sup>e</sup>   | 92.32 <sup>e</sup>   | 92.96 <sup>e</sup>   | 95.85 <sup>e</sup>   | 98.32 <sup>c</sup>   | 100.02 <sup>b</sup> |
| 13.5                  | 85.03 <sup>d</sup>               | 84.88 <sup>d</sup>   | 83.98 <sup>d</sup>   | 84.96 <sup>d</sup>   | 85.29 <sup>d</sup>   | 85.85 <sup>d</sup>   | 85.99 <sup>d</sup>   | 97.56 <sup>cb</sup>  | 100.09 <sup>b</sup> |
| 16                    | 83.19 <sup>c</sup>               | 82.96 <sup>c</sup>   | 82.45 <sup>c</sup>   | 82.46 <sup>c</sup>   | 82.79 <sup>c</sup>   | 83.43 <sup>c</sup>   | 84.90 <sup>c</sup>   | 97.32 <sup>b</sup>   | 99.65 <sup>ba</sup> |
| 18                    | 79.10 <sup>b</sup>               | 78.99 <sup>b</sup>   | 79.49 <sup>b</sup>   | 79.71 <sup>b</sup>   | 79.82 <sup>b</sup>   | 79.90 <sup>b</sup>   | 82.32 <sup>b</sup>   | 96.85 <sup>ba</sup>  | 98.75 <sup>a</sup>  |
| 20                    | 77.72 <sup>a</sup>               | 77.41 <sup>a</sup>   | 77.52 <sup>a</sup>   | 78.07 <sup>a</sup>   | 77.69 <sup>a</sup>   | 78.76 <sup>a</sup>   | 79.32 <sup>a</sup>   | 96.52 <sup>a</sup>   | 97.99 <sup>a</sup>  |

Table S10. Reducing power to samples with thiamine pyrophosphate and EGCG

| thiamine<br>[mg/100g] | Reducing power                   |                      |                      |                      |                      |                      |                      |                      |                     |
|-----------------------|----------------------------------|----------------------|----------------------|----------------------|----------------------|----------------------|----------------------|----------------------|---------------------|
|                       | Concentrations of EGCG [mg/100g] |                      |                      |                      |                      |                      |                      |                      |                     |
|                       | 0.04                             | 0.1                  | 0.5                  | 1.0                  | 2.0                  | 3.0                  | 4.0                  | 5.0                  | 6.0                 |
| 0                     | 100.00 <sup>g</sup>              | 100.00 <sup>gf</sup> | 100.00 <sup>g</sup>  | 100.00 <sup>g</sup>  | 100.00 <sup>hg</sup> | 100.00 <sup>hg</sup> | 100.00 <sup>hg</sup> | 100.00 <sup>ed</sup> | 100.00 <sup>c</sup> |
| 0.01                  | 99.58 <sup>gf</sup>              | 100.12 <sup>gf</sup> | 100.21 <sup>hg</sup> | 100.98               | 100.25 <sup>hg</sup> | 99.87 <sup>g</sup>   | 100.56 <sup>h</sup>  | 100.00 <sup>ed</sup> | 100.24 <sup>c</sup> |
| 0.02                  | 99.89 <sup>g</sup>               | 99.89 <sup>f</sup>   | 100.35 <sup>hg</sup> | 100.54 <sup>hg</sup> | 99.45 <sup>g</sup>   | 100.35 <sup>hg</sup> | 100.45 <sup>h</sup>  | 99.89 <sup>d</sup>   | 100.54 <sup>c</sup> |
| 0.04                  | 100.26 <sup>g</sup>              | 99.45 <sup>f</sup>   | 99.89 <sup>g</sup>   | 99.87 <sup>g</sup>   | 100.89 <sup>h</sup>  | 100.22 <sup>hg</sup> | 100.89 <sup>h</sup>  | 99.45 <sup>d</sup>   | 100.65 <sup>c</sup> |
| 0.06                  | 100.09 <sup>g</sup>              | 100.35 <sup>gf</sup> | 100.13 <sup>hg</sup> | 100.45 <sup>g</sup>  | 100.65 <sup>h</sup>  | 100.45 <sup>h</sup>  | 99.45 <sup>g</sup>   | 100.25 <sup>ed</sup> | 99.45 <sup>cb</sup> |
| 0.08                  | 100.03 <sup>g</sup>              | 100.09 <sup>gf</sup> | 100.45 <sup>h</sup>  | 101.54 <sup>h</sup>  | 100.98 <sup>h</sup>  | 100.87 <sup>h</sup>  | 100.14 <sup>hg</sup> | 100.34 <sup>ed</sup> | 100.54 <sup>c</sup> |
| 0.1                   | 101.12 <sup>h</sup>              | 101.13 <sup>g</sup>  | 100.44 <sup>hg</sup> | 100.33 <sup>g</sup>  | 100.09 <sup>hg</sup> | 100.01 <sup>hg</sup> | 100.97 <sup>ih</sup> | 99.97 <sup>d</sup>   | 100.16 <sup>c</sup> |
| 0.2                   | 103.12 <sup>i</sup>              | 103.55 <sup>h</sup>  | 103.56 <sup>j</sup>  | 103.04 <sup>ji</sup> | 103.12               | 102.98 <sup>ji</sup> | 101.11 <sup>i</sup>  | 100.75 <sup>e</sup>  | 100.09 <sup>c</sup> |
| 0.4                   | 102.44 <sup>h</sup>              | 104.43 <sup>i</sup>  | 102.73 <sup>i</sup>  | 101.77 <sup>ih</sup> | 103.56 <sup>ji</sup> | 103.56 <sup>kj</sup> | 101.94 <sup>ji</sup> | 100.44 <sup>ed</sup> | 100.09 <sup>c</sup> |
| 0.8                   | 106.19 <sup>k</sup>              | 105.11 <sup>ji</sup> | 102.66 <sup>i</sup>  | 102.33 <sup>i</sup>  | 104.03 <sup>j</sup>  | 103.89 <sup>k</sup>  | 102.33 <sup>j</sup>  | 100.77 <sup>e</sup>  | 100.36 <sup>c</sup> |
| 1.0                   | 105.86 <sup>k</sup>              | 105.86 <sup>kj</sup> | 103.91 <sup>j</sup>  | 103.66 <sup>j</sup>  | 103.98 <sup>j</sup>  | 104.23 <sup>k</sup>  | 103.56 <sup>k</sup>  | 100.91 <sup>fe</sup> | 100.13 <sup>c</sup> |
| 2.0                   | 106.33 <sup>k</sup>              | 106.29 <sup>k</sup>  | 105.86 <sup>k</sup>  | 104.75 <sup>k</sup>  | 104.14 <sup>j</sup>  | 104.71               | 102.86 <sup>kj</sup> | 101.31 <sup>f</sup>  | 100.25 <sup>c</sup> |
| 3.0                   | 104.12 <sup>j</sup>              | 104.11 <sup>ih</sup> | 103.65 <sup>j</sup>  | 103.41 <sup>j</sup>  | 103.51 <sup>ji</sup> | 102.10 <sup>i</sup>  | 102.41 <sup>j</sup>  | 101.10 <sup>f</sup>  | 100.08 <sup>c</sup> |
| 4.0                   | 103.11 <sup>hi</sup>             | 103.41 <sup>h</sup>  | 102.99 <sup>ji</sup> | 103.08 <sup>ji</sup> | 102.96 <sup>i</sup>  | 102.18 <sup>i</sup>  | 101.11 <sup>i</sup>  | 100.85 <sup>fe</sup> | 100.32 <sup>c</sup> |
| 6.0                   | 100.11 <sup>g</sup>              | 100.26 <sup>gf</sup> | 100.10 <sup>hg</sup> | 100.32 <sup>g</sup>  | 99.74 <sup>g</sup>   | 99.32 <sup>g</sup>   | 100.12 <sup>hg</sup> | 99.43 <sup>d</sup>   | 100.09 <sup>c</sup> |
| 8.0                   | 98.75 <sup>f</sup>               | 99.89 <sup>f</sup>   | 89.78 <sup>e</sup>   | 94.86 <sup>f</sup>   | 94.74 <sup>f</sup>   | 94.85 <sup>f</sup>   | 96.74 <sup>f</sup>   | 99.65 <sup>d</sup>   | 99.85 <sup>c</sup>  |
| 9.0                   | 90.72 <sup>e</sup>               | 90.65 <sup>e</sup>   | 90.62 <sup>f</sup>   | 90.08 <sup>e</sup>   | 92.32 <sup>e</sup>   | 92.96 <sup>e</sup>   | 95.85 <sup>e</sup>   | 98.32 <sup>c</sup>   | 100.02 <sup>c</sup> |
| 13.5                  | 85.03 <sup>d</sup>               | 84.88 <sup>d</sup>   | 83.98 <sup>d</sup>   | 84.96 <sup>d</sup>   | 85.29 <sup>d</sup>   | 85.85 <sup>d</sup>   | 85.99 <sup>d</sup>   | 97.56 <sup>b</sup>   | 100.09 <sup>c</sup> |
| 16                    | 83.19 <sup>c</sup>               | 82.96 <sup>c</sup>   | 82.45 <sup>c</sup>   | 82.46 <sup>c</sup>   | 82.79 <sup>c</sup>   | 83.43 <sup>c</sup>   | 84.90 <sup>c</sup>   | 97.32 <sup>ba</sup>  | 99.65 <sup>cb</sup> |
| 18                    | 79.10 <sup>b</sup>               | 78.99 <sup>b</sup>   | 79.49 <sup>b</sup>   | 79.71 <sup>b</sup>   | 79.82 <sup>b</sup>   | 79.90 <sup>b</sup>   | 82.32 <sup>b</sup>   | 96.85 <sup>b</sup>   | 98.75 <sup>ba</sup> |
| 20                    | 77.72 <sup>a</sup>               | 77.41 <sup>a</sup>   | 77.52 <sup>a</sup>   | 78.07 <sup>a</sup>   | 77.69 <sup>a</sup>   | 78.76 <sup>a</sup>   | 79.32 <sup>a</sup>   | 96.52 <sup>a</sup>   | 97.99 <sup>a</sup>  |

Table S11. Reducing power to samples with thiamine hydrochloride and EGC

| thiamine<br>[mg/100g] | Reducing power                  |                      |                      |                      |                      |                      |                      |                      |                      |
|-----------------------|---------------------------------|----------------------|----------------------|----------------------|----------------------|----------------------|----------------------|----------------------|----------------------|
|                       | Concentrations of EGC [mg/100g] |                      |                      |                      |                      |                      |                      |                      |                      |
|                       | 0.04                            | 0.1                  | 0.5                  | 1.0                  | 2.0                  | 3.0                  | 4.0                  | 5.0                  | 6.0                  |
| 0                     | 100.00 <sup>g</sup>             | 100.25 <sup>fe</sup> | 100.00 <sup>f</sup>  | 100.00 <sup>h</sup>  | 100.00 <sup>g</sup>  | 100.00 <sup>hg</sup> | 100.00 <sup>ed</sup> | 100.00 <sup>b</sup>  | 100.00 <sup>dc</sup> |
| 0.01                  | 100.25 <sup>g</sup>             | 100.08 <sup>e</sup>  | 100.09 <sup>f</sup>  | 100.08 <sup>ih</sup> | 100.09 <sup>g</sup>  | 99.98 <sup>hg</sup>  | 100.03 <sup>ed</sup> | 100.09 <sup>cb</sup> | 100.00 <sup>dc</sup> |
| 0.02                  | 101.03 <sup>h</sup>             | 100.20 <sup>fe</sup> | 100.12 <sup>f</sup>  | 100.50 <sup>ih</sup> | 99.89 <sup>g</sup>   | 100.45 <sup>hg</sup> | 100.12 <sup>ed</sup> | 100.17 <sup>cb</sup> | 100.21 <sup>dc</sup> |
| 0.04                  | 100.35 <sup>g</sup>             | 99.89 <sup>e</sup>   | 100.34 <sup>gf</sup> | 100.75 <sup>i</sup>  | 100.17 <sup>hg</sup> | 100.65 <sup>hg</sup> | 99.98 <sup>ed</sup>  | 100.19 <sup>cb</sup> | 100.09 <sup>dc</sup> |
| 0.06                  | 100.09 <sup>g</sup>             | 100.05 <sup>e</sup>  | 100.09 <sup>f</sup>  | 99.85 <sup>h</sup>   | 100.19 <sup>hg</sup> | 101.09 <sup>ih</sup> | 100.17 <sup>ed</sup> | 100.19 <sup>cb</sup> | 99.89 <sup>c</sup>   |
| 0.08                  | 100.65 <sup>hg</sup>            | 99.58 <sup>e</sup>   | 100.05 <sup>f</sup>  | 100.56 <sup>ih</sup> | 100.21 <sup>hg</sup> | 100.87 <sup>h</sup>  | 100.16 <sup>ed</sup> | 99.98 <sup>b</sup>   | 100.25 <sup>dc</sup> |
| 0.1                   | 100.09 <sup>g</sup>             | 99.89 <sup>e</sup>   | 100.09 <sup>f</sup>  | 99.84 <sup>h</sup>   | 100.33 <sup>ih</sup> | 99.97 <sup>g</sup>   | 100.34 <sup>e</sup>  | 100.66 <sup>c</sup>  | 99.61 <sup>c</sup>   |
| 0.2                   | 102.03 <sup>i</sup>             | 102.12 <sup>g</sup>  | 102.20 <sup>h</sup>  | 102.12 <sup>j</sup>  | 103.45 <sup>k</sup>  | 102.56 <sup>ji</sup> | 101.86 <sup>gf</sup> | 100.54 <sup>cb</sup> | 99.93 <sup>c</sup>   |
| 0.4                   | 103.74 <sup>kj</sup>            | 103.09 <sup>h</sup>  | 103.35 <sup>i</sup>  | 103.45 <sup>k</sup>  | 104.56               | 102.45 <sup>ji</sup> | 102.23 <sup>hg</sup> | 99.41 <sup>b</sup>   | 100.09 <sup>dc</sup> |
| 0.8                   | 104.11 <sup>lk</sup>            | 104.11 <sup>i</sup>  | 103.86 <sup>i</sup>  | 103.86 <sup>k</sup>  | 104.44 <sup>l</sup>  | 103.00 <sup>kj</sup> | 103.03 <sup>h</sup>  | 100.36 <sup>cb</sup> | 99.77 <sup>c</sup>   |
| 1.0                   | 104.90 <sup>ml</sup>            | 105.83 <sup>j</sup>  | 105.69 <sup>j</sup>  | 103.45 <sup>k</sup>  | 103.98 <sup>lk</sup> | 103.89 <sup>lk</sup> | 103.09 <sup>h</sup>  | 101.05 <sup>c</sup>  | 100.89 <sup>ed</sup> |
| 2.0                   | 105.55 <sup>m</sup>             | 105.86 <sup>j</sup>  | 105.87 <sup>j</sup>  | 105.29 <sup>l</sup>  | 104.03 <sup>l</sup>  | 104.44 <sup>l</sup>  | 104.69 <sup>i</sup>  | 103.56 <sup>e</sup>  | 100.25 <sup>dc</sup> |
| 3.0                   | 103.10 <sup>j</sup>             | 100.90 <sup>f</sup>  | 105.34 <sup>j</sup>  | 103.23 <sup>k</sup>  | 104.23 <sup>l</sup>  | 103.20 <sup>k</sup>  | 102.09 <sup>g</sup>  | 101.99 <sup>d</sup>  | 100.32 <sup>dc</sup> |
| 4.0                   | 102.01 <sup>i</sup>             | 101.64 <sup>gf</sup> | 101.09 <sup>g</sup>  | 101.67 <sup>j</sup>  | 102.66 <sup>l</sup>  | 101.67 <sup>i</sup>  | 101.80 <sup>gf</sup> | 102.23 <sup>d</sup>  | 101.85               |
| 6.0                   | 96.80 <sup>f</sup>              | 100.09 <sup>e</sup>  | 100.03 <sup>f</sup>  | 97.89 <sup>g</sup>   | 101.25 <sup>ji</sup> | 97.84 <sup>f</sup>   | 101.47 <sup>f</sup>  | 101.32 <sup>dc</sup> | 99.43 <sup>ca</sup>  |
| 8.0                   | 96.80 <sup>f</sup>              | 100.01 <sup>e</sup>  | 97.89 <sup>e</sup>   | 100.35 <sup>f</sup>  | 97.83 <sup>f</sup>   | 100.35 <sup>hg</sup> | 101.47 <sup>f</sup>  | 101.32 <sup>dc</sup> | 98.32 <sup>ba</sup>  |
| 9.0                   | 93.38 <sup>e</sup>              | 93.06 <sup>d</sup>   | 93.57 <sup>d</sup>   | 92.91 <sup>e</sup>   | 94.38 <sup>e</sup>   | 94.27 <sup>e</sup>   | 99.38 <sup>d</sup>   | 101.80 <sup>dc</sup> | 100.11 <sup>e</sup>  |
| 13.5                  | 90.43 <sup>d</sup>              | 90.10 <sup>c</sup>   | 89.85 <sup>c</sup>   | 89.90 <sup>d</sup>   | 89.77 <sup>d</sup>   | 89.85 <sup>d</sup>   | 93.56 <sup>c</sup>   | 100.25 <sup>cb</sup> | 99.32 <sup>cb</sup>  |
| 16                    | 86.43 <sup>c</sup>              | 86.83 <sup>b</sup>   | 86.46 <sup>b</sup>   | 86.54 <sup>c</sup>   | 87.30 <sup>c</sup>   | 87.72 <sup>c</sup>   | 90.69 <sup>b</sup>   | 100.85 <sup>c</sup>  | 98.65 <sup>ba</sup>  |
| 18                    | 84.28 <sup>b</sup>              | 84.72 <sup>a</sup>   | 84.35 <sup>a</sup>   | 85.42 <sup>b</sup>   | 84.95 <sup>b</sup>   | 84.98 <sup>b</sup>   | 87.42 <sup>a</sup>   | 99.89 <sup>b</sup>   | 98.43 <sup>ba</sup>  |
| 20                    | 83.26 <sup>a</sup>              | 84.56 <sup>a</sup>   | 83.43 <sup>a</sup>   | 82.94 <sup>a</sup>   | 82.56 <sup>a</sup>   | 83.49 <sup>a</sup>   | 86.98 <sup>a</sup>   | 97.46 <sup>a</sup>   | 97.85 <sup>a</sup>   |

Table S12. Reducing power to samples with thiamine pyrophosphate and EGC

| thiamine<br>[mg/100g] | Reducing power                  |                      |                      |                      |                      |                      |                      |                      |                      |
|-----------------------|---------------------------------|----------------------|----------------------|----------------------|----------------------|----------------------|----------------------|----------------------|----------------------|
|                       | Concentrations of EGC [mg/100g] |                      |                      |                      |                      |                      |                      |                      |                      |
|                       | 0.04                            | 0.1                  | 0.5                  | 1.0                  | 2.0                  | 3.0                  | 4.0                  | 5.0                  | 6.0                  |
| 0                     | 100.00 <sup>h</sup>             | 100.25 <sup>e</sup>  | 100.00 <sup>f</sup>  | 100.00 <sup>g</sup>  | 100.00 <sup>f</sup>  | 100.00 <sup>g</sup>  | 100.00 <sup>fe</sup> | 100.00 <sup>b</sup>  | 100.00 <sup>dc</sup> |
| 0.01                  | 100.25 <sup>h</sup>             | 100.08 <sup>e</sup>  | 100.09 <sup>f</sup>  | 100.08 <sup>g</sup>  | 100.09 <sup>f</sup>  | 99.98 <sup>g</sup>   | 100.03 <sup>fe</sup> | 100.09 <sup>cb</sup> | 100.00 <sup>dc</sup> |
| 0.02                  | 101.03 <sup>i</sup>             | 100.20 <sup>fe</sup> | 100.12 <sup>gf</sup> | 100.50 <sup>hg</sup> | 99.89 <sup>f</sup>   | 100.45 <sup>hg</sup> | 100.12 <sup>fe</sup> | 100.17 <sup>cb</sup> | 100.21 <sup>dc</sup> |
| 0.04                  | 100.35 <sup>ih</sup>            | 99.89 <sup>e</sup>   | 100.34 <sup>gf</sup> | 100.75 <sup>hg</sup> | 100.17 <sup>f</sup>  | 100.65 <sup>hg</sup> | 99.98 <sup>fe</sup>  | 100.19 <sup>cb</sup> | 100.09 <sup>dc</sup> |
| 0.06                  | 100.09 <sup>h</sup>             | 100.05 <sup>e</sup>  | 100.09 <sup>f</sup>  | 99.85 <sup>g</sup>   | 100.19 <sup>f</sup>  | 101.09               | 100.17 <sup>fe</sup> | 100.19 <sup>cb</sup> | 99.89 <sup>c</sup>   |
| 0.08                  | 100.65 <sup>ih</sup>            | 99.58 <sup>e</sup>   | 100.05 <sup>f</sup>  | 100.56 <sup>hg</sup> | 100.21 <sup>gf</sup> | 100.87 <sup>h</sup>  | 100.16 <sup>fe</sup> | 99.98 <sup>b</sup>   | 100.25 <sup>dc</sup> |
| 0.1                   | 100.09 <sup>h</sup>             | 99.89 <sup>e</sup>   | 100.09 <sup>f</sup>  | 99.84 <sup>g</sup>   | 100.33 <sup>gf</sup> | 99.97 <sup>g</sup>   | 100.34 <sup>f</sup>  | 100.66 <sup>cc</sup> | 99.61 <sup>c</sup>   |
| 0.2                   | 102.56 <sup>lk</sup>            | 102.45 <sup>ih</sup> | 102.20 <sup>h</sup>  | 102.24 <sup>ji</sup> | 102.44 <sup>h</sup>  | 102.03 <sup>ji</sup> | 101.86 <sup>ih</sup> | 100.54 <sup>c</sup>  | 99.93                |
| 0.4                   | 103.74 <sup>nm</sup>            | 103.09 <sup>i</sup>  | 103.35 <sup>i</sup>  | 102.76 <sup>kj</sup> | 102.49 <sup>h</sup>  | 102.45 <sup>kj</sup> | 101.20 <sup>ge</sup> | 99.41 <sup>b</sup>   | 100.09 <sup>dc</sup> |
| 0.8                   | 104.11 <sup>n</sup>             | 104.11 <sup>j</sup>  | 103.86 <sup>i</sup>  | 103.86 <sup>l</sup>  | 104.44 <sup>j</sup>  | 103.00 <sup>k</sup>  | 103.03 <sup>j</sup>  | 100.36 <sup>c</sup>  | 99.77 <sup>c</sup>   |
| 1.0                   | 104.90 <sup>on</sup>            | 105.83 <sup>k</sup>  | 105.69 <sup>j</sup>  | 103.45 <sup>lk</sup> | 103.04 <sup>h</sup>  | 101.05 <sup>ih</sup> | 103.09 <sup>j</sup>  | 101.05 <sup>dc</sup> | 100.89 <sup>d</sup>  |
| 2.0                   | 105.55 <sup>o</sup>             | 105.86 <sup>k</sup>  | 105.87 <sup>j</sup>  | 105.29 <sup>m</sup>  | 104.03 <sup>j</sup>  | 104.44 <sup>l</sup>  | 104.69 <sup>k</sup>  | 101.97 <sup>d</sup>  | 100.25 <sup>dc</sup> |
| 3.0                   | 103.10 <sup>ml</sup>            | 100.90 <sup>gf</sup> | 105.34 <sup>j</sup>  | 103.2 <sup>lk</sup>  | 104.23 <sup>j</sup>  | 103.20 <sup>k</sup>  | 102.09 <sup>i</sup>  | 101.99 <sup>d</sup>  | 100.32 <sup>dc</sup> |
| 4.0                   | 102.01 <sup>ki</sup>            | 101.64 <sup>hg</sup> | 101.09 <sup>g</sup>  | 101.67 <sup>ih</sup> | 102.66 <sup>ih</sup> | 101.67 <sup>i</sup>  | 101.80 <sup>ih</sup> | 102.23 <sup>d</sup>  | 101.85 <sup>e</sup>  |
| 6.0                   | 96.80 <sup>g</sup>              | 100.09 <sup>e</sup>  | 100.03 <sup>f</sup>  | 97.89 <sup>f</sup>   | 101.25 <sup>g</sup>  | 97.84 <sup>f</sup>   | 101.47 <sup>hg</sup> | 101.32 <sup>dc</sup> | 99.43 <sup>c</sup>   |
| 8.0                   | 96.80 <sup>f</sup>              | 100.01 <sup>e</sup>  | 97.89 <sup>e</sup>   | 100.35               | 97.83 <sup>f</sup>   | 100.35               | 101.47 <sup>hg</sup> | 101.32 <sup>dc</sup> | 98.32 <sup>b</sup>   |
| 9.0                   | 93.38 <sup>e</sup>              | 93.06 <sup>d</sup>   | 93.57 <sup>e</sup>   | 92.91 <sup>e</sup>   | 94.38 <sup>e</sup>   | 94.27 <sup>e</sup>   | 99.38 <sup>e</sup>   | 101.80 <sup>d</sup>  | 100.11 <sup>dc</sup> |
| 13.5                  | 90.43 <sup>d</sup>              | 90.10 <sup>c</sup>   | 89.85 <sup>d</sup>   | 89.90 <sup>d</sup>   | 89.77 <sup>d</sup>   | 89.85 <sup>d</sup>   | 93.56 <sup>d</sup>   | 100.25 <sup>cb</sup> | 99.32 <sup>cb</sup>  |
| 16                    | 86.43 <sup>c</sup>              | 86.83 <sup>b</sup>   | 86.46 <sup>c</sup>   | 86.54 <sup>c</sup>   | 87.30 <sup>c</sup>   | 87.72 <sup>c</sup>   | 90.69 <sup>c</sup>   | 100.85 <sup>c</sup>  | 98.65 <sup>b</sup>   |
| 18                    | 84.28 <sup>b</sup>              | 84.72 <sup>a</sup>   | 84.35 <sup>b</sup>   | 85.42 <sup>b</sup>   | 84.95 <sup>b</sup>   | 84.98 <sup>b</sup>   | 87.42 <sup>b</sup>   | 99.89 <sup>b</sup>   | 98.43 <sup>ba</sup>  |
| 20                    | 83.26 <sup>a</sup>              | 84.56 <sup>a</sup>   | 83.43 <sup>a</sup>   | 82.94 <sup>a</sup>   | 82.56 <sup>a</sup>   | 83.49 <sup>a</sup>   | 86.98 <sup>a</sup>   | 97.46 <sup>a</sup>   | 97.85 <sup>a</sup>   |

Table S13. Reducing power to samples with thiamine hydrochloride and ECG

| thiamine<br>[mg/100g] | Reducing power                  |                      |                     |                      |                      |                      |                      |                      |                      |
|-----------------------|---------------------------------|----------------------|---------------------|----------------------|----------------------|----------------------|----------------------|----------------------|----------------------|
|                       | Concentrations of ECG [mg/100g] |                      |                     |                      |                      |                      |                      |                      |                      |
|                       | 0.04                            | 0.1                  | 0.5                 | 1.0                  | 2.0                  | 3.0                  | 4.0                  | 5.0                  | 6.0                  |
| 0                     | 100.00 <sup>f</sup>             | 100.00 <sup>f</sup>  | 100.00 <sup>g</sup> | 100.00 <sup>h</sup>  | 100.00 <sup>g</sup>  | 100.00 <sup>g</sup>  | 100.00 <sup>g</sup>  | 100.00 <sup>c</sup>  | 100.04 <sup>c</sup>  |
| 0.01                  | 100.12 <sup>f</sup>             | 99.89 <sup>f</sup>   | 100.50 <sup>g</sup> | 99.89 <sup>h</sup>   | 100.09 <sup>g</sup>  | 100.19 <sup>g</sup>  | 99.98 <sup>g</sup>   | 100.26 <sup>dc</sup> | 99.89 <sup>c</sup>   |
| 0.02                  | 100.09 <sup>f</sup>             | 100.12 <sup>f</sup>  | 100.15 <sup>g</sup> | 100.19 <sup>h</sup>  | 100.04 <sup>g</sup>  | 99.98 <sup>g</sup>   | 100.25 <sup>hg</sup> | 100.13 <sup>dc</sup> | 100.07 <sup>c</sup>  |
| 0.04                  | 100.06 <sup>f</sup>             | 100.23 <sup>f</sup>  | 100.46 <sup>g</sup> | 100.07 <sup>h</sup>  | 99.56 <sup>g</sup>   | 100.43 <sup>hg</sup> | 100.19 <sup>g</sup>  | 100.19 <sup>dc</sup> | 100.09 <sup>c</sup>  |
| 0.06                  | 100.05 <sup>f</sup>             | 100.09 <sup>f</sup>  | 100.00 <sup>g</sup> | 100.07 <sup>h</sup>  | 100.15 <sup>g</sup>  | 99.91 <sup>g</sup>   | 100.25 <sup>g</sup>  | 99.24 <sup>c</sup>   | 99.07 <sup>c</sup>   |
| 0.08                  | 100.03 <sup>f</sup>             | 100.19 <sup>f</sup>  | 100.65 <sup>g</sup> | 100.14 <sup>h</sup>  | 100.23 <sup>g</sup>  | 100.05 <sup>g</sup>  | 99.86 <sup>g</sup>   | 99.89 <sup>c</sup>   | 100.04 <sup>c</sup>  |
| 0.1                   | 100.09 <sup>f</sup>             | 100.47 <sup>f</sup>  | 100.01 <sup>g</sup> | 100.56 <sup>h</sup>  | 100.20 <sup>g</sup>  | 100.03 <sup>g</sup>  | 100.21 <sup>g</sup>  | 100.53 <sup>dc</sup> | 99.47 <sup>c</sup>   |
| 0.2                   | 103.86 <sup>ih</sup>            | 103.23 <sup>h</sup>  | 102.86 <sup>h</sup> | 103.56 <sup>k</sup>  | 102.12 <sup>ih</sup> | 102.03 <sup>ji</sup> | 102.56 <sup>ji</sup> | 100.86 <sup>d</sup>  | 101.79 <sup>d</sup>  |
| 0.4                   | 104.11 <sup>i</sup>             | 103.56 <sup>h</sup>  | 100.55 <sup>g</sup> | 104.03 <sup>lk</sup> | 103.56 <sup>j</sup>  | 102.93 <sup>j</sup>  | 103.77 <sup>k</sup>  | 99.28 <sup>c</sup>   | 101.31 <sup>d</sup>  |
| 0.8                   | 104.91 <sup>j</sup>             | 104.67 <sup>i</sup>  | 103.45 <sup>h</sup> | 101.64 <sup>i</sup>  | 103.11 <sup>ji</sup> | 102.86 <sup>j</sup>  | 102.44 <sup>i</sup>  | 100.03 <sup>dc</sup> | 100.77 <sup>dc</sup> |
| 1.0                   | 104.89 <sup>ji</sup>            | 104.56 <sup>i</sup>  | 104.90 <sup>i</sup> | 102.56 <sup>j</sup>  | 103.54 <sup>j</sup>  | 103.88 <sup>lk</sup> | 103.38 <sup>kj</sup> | 100.69 <sup>dc</sup> | 100.08 <sup>c</sup>  |
| 2.0                   | 105.55 <sup>j</sup>             | 105.09 <sup>i</sup>  | 105.52 <sup>i</sup> | 105.33 <sup>m</sup>  | 104.90 <sup>k</sup>  | 104.20 <sup>l</sup>  | 103.42 <sup>kj</sup> | 102.45               | 100.86 <sup>dc</sup> |
| 3.0                   | 103.34 <sup>h</sup>             | 103.32 <sup>h</sup>  | 103.29 <sup>h</sup> | 103.08 <sup>kj</sup> | 103.18 <sup>ji</sup> | 102.99 <sup>kj</sup> | 101.85 <sup>ih</sup> | 101.11 <sup>ed</sup> | 100.19 <sup>dc</sup> |
| 4.0                   | 101.08 <sup>g</sup>             | 100.65 <sup>gf</sup> | 100.10 <sup>g</sup> | 100.68 <sup>ih</sup> | 101.67 <sup>h</sup>  | 101.10 <sup>ih</sup> | 101.43 <sup>h</sup>  | 100.99 <sup>d</sup>  | 101.72 <sup>d</sup>  |
| 6.0                   | 94.56 <sup>e</sup>              | 93.89 <sup>f</sup>   | 94.09 <sup>f</sup>  | 93.84 <sup>g</sup>   | 94.87 <sup>f</sup>   | 94.88 <sup>f</sup>   | 98.51 <sup>f</sup>   | 100.85 <sup>dc</sup> | 100.23 <sup>c</sup>  |
| 8.0                   | 93.79 <sup>e</sup>              | 93.89 <sup>f</sup>   | 94.09 <sup>f</sup>  | 93.84 <sup>g</sup>   | 94.87 <sup>f</sup>   | 94.88 <sup>f</sup>   | 98.51 <sup>f</sup>   | 99.65 <sup>c</sup>   | 99.89 <sup>c</sup>   |
| 9.0                   | 90.24 <sup>d</sup>              | 90.10 <sup>ie</sup>  | 90.61 <sup>e</sup>  | 88.99 <sup>f</sup>   | 91.39 <sup>e</sup>   | 91.31 <sup>e</sup>   | 96.42 <sup>e</sup>   | 100.81 <sup>dc</sup> | 98.86 <sup>b</sup>   |
| 13.5                  | 86.23 <sup>c</sup>              | 86.33 <sup>d</sup>   | 86.20 <sup>d</sup>  | 86.21 <sup>d</sup>   | 86.41 <sup>d</sup>   | 87.44 <sup>d</sup>   | 87.96 <sup>d</sup>   | 98.43 <sup>b</sup>   | 97.42 <sup>a</sup>   |
| 16                    | 83.87 <sup>b</sup>              | 83.87 <sup>c</sup>   | 83.50 <sup>c</sup>  | 83.98 <sup>c</sup>   | 84.34 <sup>c</sup>   | 84.99 <sup>c</sup>   | 87.98 <sup>c</sup>   | 97.99 <sup>b</sup>   | 98.19 <sup>ba</sup>  |
| 18                    | 80.93 <sup>a</sup>              | 81.88 <sup>b</sup>   | 81.02 <sup>b</sup>  | 82.46 <sup>b</sup>   | 81.99 <sup>b</sup>   | 82.02 <sup>b</sup>   | 84.46 <sup>b</sup>   | 97.90 <sup>b</sup>   | 99.89 <sup>c</sup>   |
| 20                    | 79.96 <sup>a</sup>              | 80.11 <sup>a</sup>   | 79.99 <sup>a</sup>  | 80.25 <sup>a</sup>   | 79.78 <sup>a</sup>   | 80.35 <sup>a</sup>   | 82.89 <sup>a</sup>   | 96.96 <sup>a</sup>   | 98.75 <sup>b</sup>   |

Table S14. Reducing power to samples with thiamine pyrophosphate and ECG

| thiamine<br>[mg/100g] | Reducing power                  |                     |                     |                     |                      |                      |                      |                      |                      |
|-----------------------|---------------------------------|---------------------|---------------------|---------------------|----------------------|----------------------|----------------------|----------------------|----------------------|
|                       | Concentrations of ECG [mg/100g] |                     |                     |                     |                      |                      |                      |                      |                      |
|                       | 0.04                            | 0.1                 | 0.5                 | 1.0                 | 2.0                  | 3.0                  | 4.0                  | 5.0                  | 6.0                  |
| 0                     | 100.00 <sup>f</sup>             | 100.00 <sup>g</sup> | 100.00 <sup>g</sup> | 100.00 <sup>g</sup> | 100.00 <sup>g</sup>  | 100.00 <sup>g</sup>  | 100.00 <sup>g</sup>  | 100.00 <sup>dc</sup> | 100.04 <sup>c</sup>  |
| 0.01                  | 100.12 <sup>f</sup>             | 99.89 <sup>g</sup>  | 100.50 <sup>g</sup> | 99.89 <sup>g</sup>  | 100.09 <sup>g</sup>  | 100.19 <sup>hg</sup> | 99.98 <sup>g</sup>   | 100.26 <sup>dc</sup> | 99.89 <sup>c</sup>   |
| 0.02                  | 100.09 <sup>f</sup>             | 100.12 <sup>g</sup> | 100.15 <sup>g</sup> | 100.19 <sup>g</sup> | 100.04 <sup>g</sup>  | 99.98 <sup>g</sup>   | 100.25 <sup>g</sup>  | 100.13 <sup>dc</sup> | 100.07 <sup>c</sup>  |
| 0.04                  | 100.06 <sup>f</sup>             | 100.23 <sup>g</sup> | 100.46 <sup>g</sup> | 100.07 <sup>g</sup> | 99.56 <sup>g</sup>   | 100.43 <sup>hg</sup> | 100.19 <sup>g</sup>  | 100.19 <sup>dc</sup> | 100.09 <sup>c</sup>  |
| 0.06                  | 100.05 <sup>f</sup>             | 100.09 <sup>g</sup> | 100.00 <sup>g</sup> | 100.07 <sup>g</sup> | 100.15 <sup>g</sup>  | 99.91 <sup>g</sup>   | 100.25 <sup>g</sup>  | 99.24 <sup>c</sup>   | 99.07 <sup>c</sup>   |
| 0.08                  | 100.03 <sup>f</sup>             | 100.19 <sup>g</sup> | 100.65 <sup>g</sup> | 100.14 <sup>g</sup> | 100.23 <sup>g</sup>  | 100.05 <sup>g</sup>  | 99.86 <sup>g</sup>   | 99.89 <sup>c</sup>   | 100.04 <sup>c</sup>  |
| 0.1                   | 100.09 <sup>gf</sup>            | 100.47 <sup>g</sup> | 100.01 <sup>g</sup> | 100.56 <sup>g</sup> | 100.20 <sup>g</sup>  | 100.03 <sup>g</sup>  | 100.21 <sup>g</sup>  | 100.53 <sup>ed</sup> | 99.47 <sup>c</sup>   |
| 0.2                   | 103.86 <sup>i</sup>             | 103.23 <sup>h</sup> | 103.45 <sup>h</sup> | 102.01 <sup>h</sup> | 102.97 <sup>i</sup>  | 103.42 <sup>kj</sup> | 100.22 <sup>g</sup>  | 100.86 <sup>ed</sup> | 101.79 <sup>e</sup>  |
| 0.4                   | 104.11 <sup>j</sup>             | 103.56 <sup>h</sup> | 103.87 <sup>h</sup> | 103.12 <sup>i</sup> | 103.47 <sup>ji</sup> | 102.93 <sup>j</sup>  | 103.77 <sup>j</sup>  | 99.28 <sup>c</sup>   | 101.31 <sup>ed</sup> |
| 0.8                   | 104.91 <sup>kj</sup>            | 104.67 <sup>i</sup> | 103.45 <sup>h</sup> | 103.45 <sup>i</sup> | 103.11 <sup>ji</sup> | 103.25 <sup>kj</sup> | 102.44 <sup>i</sup>  | 100.03 <sup>dc</sup> | 100.77 <sup>dc</sup> |
| 1.0                   | 104.89 <sup>kj</sup>            | 104.56 <sup>i</sup> | 104.90 <sup>i</sup> | 103.97 <sup>i</sup> | 103.97 <sup>j</sup>  | 103.83 <sup>lk</sup> | 103.38 <sup>j</sup>  | 100.69 <sup>d</sup>  | 100.08 <sup>c</sup>  |
| 2.0                   | 105.55 <sup>k</sup>             | 105.09 <sup>i</sup> | 105.52 <sup>i</sup> | 105.33 <sup>j</sup> | 104.90 <sup>k</sup>  | 104.67 <sup>l</sup>  | 104.19 <sup>j</sup>  | 103.98 <sup>f</sup>  | 100.86 <sup>dc</sup> |
| 3.0                   | 102.34 <sup>h</sup>             | 103.32 <sup>h</sup> | 103.29 <sup>h</sup> | 103.08 <sup>i</sup> | 103.18 <sup>ji</sup> | 102.99 <sup>i</sup>  | 101.85 <sup>ih</sup> | 101.11 <sup>e</sup>  | 100.19 <sup>c</sup>  |
| 4.0                   | 101.08 <sup>g</sup>             | 100.65 <sup>g</sup> | 100.10 <sup>g</sup> | 100.68 <sup>g</sup> | 101.67 <sup>h</sup>  | 101.10 <sup>h</sup>  | 101.43 <sup>h</sup>  | 100.99 <sup>eg</sup> | 101.72 <sup>e</sup>  |
| 6.0                   | 94.56 <sup>e</sup>              | 93.89 <sup>f</sup>  | 94.09 <sup>f</sup>  | 93.84 <sup>f</sup>  | 94.87 <sup>f</sup>   | 94.88 <sup>f</sup>   | 98.51 <sup>f</sup>   | 100.85 <sup>ed</sup> | 100.23 <sup>dc</sup> |
| 8.0                   | 93.79 <sup>e</sup>              | 93.89 <sup>f</sup>  | 94.09 <sup>f</sup>  | 93.84 <sup>f</sup>  | 94.87 <sup>f</sup>   | 94.88 <sup>f</sup>   | 98.51 <sup>f</sup>   | 99.65 <sup>c</sup>   | 99.89 <sup>c</sup>   |
| 9.0                   | 90.24 <sup>d</sup>              | 90.10 <sup>e</sup>  | 90.61 <sup>e</sup>  | 88.99 <sup>e</sup>  | 91.39 <sup>e</sup>   | 91.31 <sup>e</sup>   | 96.42 <sup>e</sup>   | 100.81 <sup>ed</sup> | 98.86 <sup>b</sup>   |
| 13.5                  | 86.23 <sup>c</sup>              | 86.33 <sup>d</sup>  | 86.20 <sup>d</sup>  | 86.21 <sup>d</sup>  | 86.41 <sup>d</sup>   | 87.44 <sup>d</sup>   | 87.96 <sup>d</sup>   | 98.43 <sup>b</sup>   | 97.42 <sup>a</sup>   |
| 16                    | 83.87 <sup>b</sup>              | 83.87 <sup>c</sup>  | 83.50 <sup>c</sup>  | 83.98 <sup>c</sup>  | 84.34 <sup>c</sup>   | 84.99 <sup>c</sup>   | 87.98 <sup>c</sup>   | 97.99 <sup>b</sup>   | 98.19 <sup>ba</sup>  |
| 18                    | 80.93 <sup>a</sup>              | 81.88 <sup>b</sup>  | 81.02 <sup>b</sup>  | 82.46 <sup>b</sup>  | 81.99 <sup>b</sup>   | 82.02 <sup>b</sup>   | 84.46 <sup>b</sup>   | 97.90 <sup>b</sup>   | 99.89 <sup>c</sup>   |
| 20                    | 79.96 <sup>a</sup>              | 80.11 <sup>a</sup>  | 79.99 <sup>a</sup>  | 80.25 <sup>a</sup>  | 79.78 <sup>a</sup>   | 80.35 <sup>a</sup>   | 82.89 <sup>a</sup>   | 96.96 <sup>a</sup>   | 98.75 <sup>b</sup>   |

Table S15. Reducing power to samples with thiamine hydrochloride and caffeine

| thiamine<br>[mg/100g] | Reducing power                       |                     |                      |                      |                      |                      |                      |                      |                      |
|-----------------------|--------------------------------------|---------------------|----------------------|----------------------|----------------------|----------------------|----------------------|----------------------|----------------------|
|                       | Concentrations of caffeine [mg/100g] |                     |                      |                      |                      |                      |                      |                      |                      |
|                       | 0.04                                 | 0.1                 | 0.5                  | 1.0                  | 2.0                  | 3.0                  | 4.0                  | 5.0                  | 6.0                  |
| 0                     | 100.00 <sup>f</sup>                  | 100.00 <sup>h</sup> | 100.00 <sup>g</sup>  | 100.00 <sup>hg</sup> | 100.00 <sup>gf</sup> | 100.00 <sup>d</sup>  | 100.00 <sup>d</sup>  | 100.00 <sup>b</sup>  | 100.25 <sup>a</sup>  |
| 0.01                  | 100.25 <sup>gf</sup>                 | 100.07 <sup>h</sup> | 100.25 <sup>hg</sup> | 100.07 <sup>hg</sup> | 100.03 <sup>gf</sup> | 99.59 <sup>d</sup>   | 99.56 <sup>c</sup>   | 99.89 <sup>b</sup>   | 100.12 <sup>a</sup>  |
| 0.02                  | 100.67 <sup>gf</sup>                 | 100.28 <sup>h</sup> | 100.19 <sup>gh</sup> | 100.12 <sup>hg</sup> | 100.12 <sup>gf</sup> | 100.12 <sup>ed</sup> | 100.02 <sup>dc</sup> | 99.78 <sup>b</sup>   | 100.13 <sup>a</sup>  |
| 0.04                  | 100.45 <sup>gf</sup>                 | 100.08 <sup>h</sup> | 100.09 <sup>gh</sup> | 99.00 <sup>g</sup>   | 100.18 <sup>gf</sup> | 100.24 <sup>ed</sup> | 100.12 <sup>dc</sup> | 100.34 <sup>cb</sup> | 100.45 <sup>a</sup>  |
| 0.06                  | 100.09 <sup>gf</sup>                 | 100.45 <sup>h</sup> | 100.20 <sup>gh</sup> | 99.54 <sup>g</sup>   | 100.09 <sup>gf</sup> | 100.56 <sup>e</sup>  | 100.26 <sup>a</sup>  | 100.12 <sup>b</sup>  | 100.23 <sup>a</sup>  |
| 0.08                  | 100.12 <sup>gf</sup>                 | 100.35 <sup>h</sup> | 100.19 <sup>gh</sup> | 100.04 <sup>hg</sup> | 99.89 <sup>f</sup>   | 100.12 <sup>ed</sup> | 100.23 <sup>dc</sup> | 100.13 <sup>b</sup>  | 100.01 <sup>a</sup>  |
| 0.1                   | 100.25 <sup>gf</sup>                 | 99.64 <sup>h</sup>  | 99.33 <sup>h</sup>   | 99.37 <sup>g</sup>   | 99.44 <sup>f</sup>   | 100.11 <sup>ed</sup> | 99.97 <sup>c</sup>   | 100.09 <sup>b</sup>  | 100.06 <sup>a</sup>  |
| 0.2                   | 101.09                               | 99.93 <sup>h</sup>  | 99.77 <sup>h</sup>   | 99.88 <sup>g</sup>   | 99.68 <sup>f</sup>   | 99.66 <sup>d</sup>   | 100.77 <sup>d</sup>  | 99.94 <sup>b</sup>   | 100.09 <sup>a</sup>  |
| 0.4                   | 100.21 <sup>gf</sup>                 | 99.66 <sup>h</sup>  | 99.77 <sup>h</sup>   | 100.44 <sup>h</sup>  | 100.35 <sup>gf</sup> | 100.09 <sup>ed</sup> | 99.98 <sup>c</sup>   | 99.53 <sup>b</sup>   | 100.07 <sup>a</sup>  |
| 0.8                   | 101.33 <sup>g</sup>                  | 100.66 <sup>h</sup> | 99.73 <sup>h</sup>   | 100.33 <sup>h</sup>  | 99.66 <sup>f</sup>   | 100.07 <sup>ed</sup> | 99.44 <sup>c</sup>   | 98.91 <sup>a</sup>   | 100.02 <sup>a</sup>  |
| 1.0                   | 103.45 <sup>h</sup>                  | 102.86 <sup>i</sup> | 100.77 <sup>ih</sup> | 101.22 <sup>i</sup>  | 100.08 <sup>gf</sup> | 100.23 <sup>ed</sup> | 97.15 <sup>a</sup>   | 99.75 <sup>b</sup>   | 100.03 <sup>a</sup>  |
| 2.0                   | 104.66 <sup>i</sup>                  | 104.42 <sup>j</sup> | 102.88 <sup>kj</sup> | 102.44 <sup>kj</sup> | 100.87 <sup>g</sup>  | 101.22 <sup>fe</sup> | 102.44               | 101.35               | 101.54 <sup>b</sup>  |
| 3.0                   | 100.26 <sup>gf</sup>                 | 100.19 <sup>h</sup> | 102.08 <sup>j</sup>  | 103.85 <sup>i</sup>  | 102.22 <sup>h</sup>  | 101.54 <sup>fe</sup> | 99.90                | 99.52 <sup>b</sup>   | 100.10 <sup>a</sup>  |
| 4.0                   | 100.65 <sup>gf</sup>                 | 100.25 <sup>h</sup> | 101.32 <sup>ji</sup> | 102.06 <sup>ji</sup> | 103.32 <sup>i</sup>  | 99.74 <sup>d</sup>   | 101.64               | 100.65 <sup>c</sup>  | 99.76 <sup>a</sup>   |
| 6.0                   | 99.89 <sup>f</sup>                   | 97.90 <sup>g</sup>  | 99.45 <sup>f</sup>   | 99.34 <sup>g</sup>   | 99.35 <sup>f</sup>   | 99.34 <sup>d</sup>   | 100.10               | 100.19 <sup>cb</sup> | 100.78 <sup>ba</sup> |
| 8.0                   | 98.28 <sup>e</sup>                   | 95.54 <sup>f</sup>  | 96.45 <sup>e</sup>   | 98.56 <sup>f</sup>   | 98.32 <sup>e</sup>   | 99.45 <sup>d</sup>   | 98.78 <sup>cb</sup>  | 99.80 <sup>b</sup>   | 103.94 <sup>c</sup>  |
| 9.0                   | 93.97 <sup>d</sup>                   | 93.32 <sup>e</sup>  | 94.90 <sup>d</sup>   | 94.02 <sup>e</sup>   | 98.65 <sup>e</sup>   | 99.48 <sup>d</sup>   | 99.34 <sup>c</sup>   | 100.23 <sup>cb</sup> | 100.43 <sup>ba</sup> |
| 13.5                  | 91.10 <sup>c</sup>                   | 90.48 <sup>d</sup>  | 91.00 <sup>c</sup>   | 91.04 <sup>d</sup>   | 91.45 <sup>d</sup>   | 94.55 <sup>c</sup>   | 100.12               | 100.19 <sup>cb</sup> | 100.25 <sup>ba</sup> |
| 16                    | 86.90 <sup>c</sup>                   | 89.75 <sup>c</sup>  | 85.01 <sup>b</sup>   | 86.78 <sup>c</sup>   | 87.83 <sup>c</sup>   | 92.43 <sup>b</sup>   | 98.78 <sup>b</sup>   | 101.90 <sup>d</sup>  | 100.38 <sup>ba</sup> |
| 18                    | 84.56 <sup>b</sup>                   | 80.75 <sup>a</sup>  | 83.11 <sup>a</sup>   | 84.99 <sup>b</sup>   | 85.51 <sup>b</sup>   | 89.10 <sup>a</sup>   | 96.90 <sup>a</sup>   | 102.32 <sup>d</sup>  | 99.98 <sup>a</sup>   |
| 20                    | 82.45 <sup>a</sup>                   | 82.48 <sup>b</sup>  | 82.58 <sup>a</sup>   | 83.34 <sup>a</sup>   | 83.92 <sup>a</sup>   | 89.12 <sup>a</sup>   | 97.38 <sup>a</sup>   | 99.98 <sup>b</sup>   | 100.31 <sup>ba</sup> |

Table S16. Reducing power to samples with thiamine pyrophosphate and caffeine

| thiamine<br>[mg/100g] | Reducing power                       |                      |                      |                      |                      |                      |                      |                      |                      |
|-----------------------|--------------------------------------|----------------------|----------------------|----------------------|----------------------|----------------------|----------------------|----------------------|----------------------|
|                       | Concentrations of caffeine [mg/100g] |                      |                      |                      |                      |                      |                      |                      |                      |
|                       | 0.04                                 | 0.1                  | 0.5                  | 1.0                  | 2.0                  | 3.0                  | 4.0                  | 5.0                  | 6.0                  |
| 0                     | 100.00 <sup>g</sup>                  | 100.00 <sup>ih</sup> | 100.00 <sup>g</sup>  | 100.00 <sup>g</sup>  | 100.00 <sup>gf</sup> | 100.00 <sup>ed</sup> | 100.00 <sup>ed</sup> | 100.00 <sup>b</sup>  | 100.25 <sup>a</sup>  |
| 0.01                  | 100.25 <sup>hg</sup>                 | 100.07 <sup>ih</sup> | 100.25 <sup>hg</sup> | 100.07 <sup>g</sup>  | 100.03 <sup>gf</sup> | 99.59 <sup>d</sup>   | 99.56 <sup>d</sup>   | 99.89 <sup>b</sup>   | 100.12 <sup>a</sup>  |
| 0.02                  | 100.67 <sup>hg</sup>                 | 100.28 <sup>ih</sup> | 100.19 <sup>hg</sup> | 100.12 <sup>g</sup>  | 100.12 <sup>g</sup>  | 100.12 <sup>ed</sup> | 100.02 <sup>ed</sup> | 99.78 <sup>ba</sup>  | 100.13 <sup>a</sup>  |
| 0.04                  | 100.45 <sup>hg</sup>                 | 100.08 <sup>ih</sup> | 100.09 <sup>hg</sup> | 99.34 <sup>gf</sup>  | 100.18 <sup>g</sup>  | 100.24 <sup>ed</sup> | 100.12 <sup>ed</sup> | 100.34 <sup>cb</sup> | 100.45 <sup>ba</sup> |
| 0.06                  | 100.09 <sup>g</sup>                  | 100.45 <sup>ih</sup> | 100.20 <sup>hg</sup> | 99.44 <sup>gf</sup>  | 100.09 <sup>g</sup>  | 100.56 <sup>e</sup>  | 100.26 <sup>ed</sup> | 100.12 <sup>b</sup>  | 100.23 <sup>a</sup>  |
| 0.08                  | 100.12 <sup>g</sup>                  | 100.35 <sup>ih</sup> | 100.19 <sup>hg</sup> | 100.04 <sup>g</sup>  | 99.89 <sup>gf</sup>  | 100.12 <sup>ed</sup> | 100.23 <sup>ed</sup> | 100.13 <sup>b</sup>  | 100.01 <sup>a</sup>  |
| 0.1                   | 100.25 <sup>hg</sup>                 | 99.64 <sup>h</sup>   | 99.33 <sup>g</sup>   | 99.37 <sup>gh</sup>  | 99.44 <sup>f</sup>   | 100.11 <sup>ed</sup> | 99.97 <sup>ed</sup>  | 100.09 <sup>b</sup>  | 100.06 <sup>a</sup>  |
| 0.2                   | 101.09 <sup>h</sup>                  | 99.93 <sup>h</sup>   | 99.77 <sup>g</sup>   | 99.88 <sup>g</sup>   | 99.68 <sup>f</sup>   | 99.66 <sup>d</sup>   | 100.77 <sup>fe</sup> | 99.94 <sup>b</sup>   | 100.09 <sup>a</sup>  |
| 0.4                   | 100.21 <sup>hg</sup>                 | 99.66 <sup>h</sup>   | 99.77 <sup>g</sup>   | 100.44 <sup>hg</sup> | 100.35 <sup>g</sup>  | 100.09 <sup>ed</sup> | 99.98 <sup>ed</sup>  | 99.53 <sup>ba</sup>  | 100.07 <sup>a</sup>  |
| 0.8                   | 101.33 <sup>h</sup>                  | 100.66 <sup>i</sup>  | 99.73 <sup>g</sup>   | 100.33 <sup>hg</sup> | 99.66 <sup>f</sup>   | 100.07 <sup>ed</sup> | 99.44 <sup>d</sup>   | 98.91 <sup>a</sup>   | 100.02 <sup>a</sup>  |
| 1.0                   | 103.45 <sup>i</sup>                  | 102.86 <sup>j</sup>  | 100.77 <sup>ih</sup> | 101.22 <sup>h</sup>  | 100.08 <sup>gf</sup> | 100.23 <sup>e</sup>  | 95.15 <sup>a</sup>   | 99.75 <sup>b</sup>   | 100.03 <sup>a</sup>  |
| 2.0                   | 104.66 <sup>j</sup>                  | 104.42 <sup>k</sup>  | 102.88 <sup>j</sup>  | 102.44 <sup>i</sup>  | 100.87 <sup>g</sup>  | 101.22 <sup>fe</sup> | 102.44               | 101.35 <sup>c</sup>  | 101.54 <sup>b</sup>  |
| 3.0                   | 100.26 <sup>hg</sup>                 | 100.19 <sup>ih</sup> | 102.08 <sup>ji</sup> | 103.85 <sup>j</sup>  | 102.22 <sup>h</sup>  | 101.54 <sup>f</sup>  | 99.90 <sup>ed</sup>  | 99.52 <sup>ba</sup>  | 100.10 <sup>a</sup>  |
| 4.0                   | 100.65 <sup>hg</sup>                 | 100.25 <sup>ih</sup> | 101.32 <sup>ih</sup> | 102.06 <sup>ih</sup> | 103.32 <sup>i</sup>  | 99.74 <sup>d</sup>   | 101.64 <sup>f</sup>  | 100.65 <sup>cb</sup> | 99.76 <sup>a</sup>   |
| 6.0                   | 99.89 <sup>g</sup>                   | 97.90 <sup>g</sup>   | 99.45 <sup>g</sup>   | 99.34 <sup>gf</sup>  | 99.35 <sup>f</sup>   | 99.34 <sup>d</sup>   | 100.10 <sup>ed</sup> | 100.19 <sup>ba</sup> | 100.78 <sup>ba</sup> |
| 8.0                   | 98.28 <sup>f</sup>                   | 95.54 <sup>f</sup>   | 96.45 <sup>f</sup>   | 98.56 <sup>f</sup>   | 98.32 <sup>e</sup>   | 99.45 <sup>d</sup>   | 98.78 <sup>dc</sup>  | 99.80 <sup>b</sup>   | 103.94 <sup>c</sup>  |
| 9.0                   | 93.97 <sup>e</sup>                   | 93.32 <sup>e</sup>   | 94.90 <sup>e</sup>   | 94.02 <sup>e</sup>   | 98.65 <sup>e</sup>   | 99.48 <sup>d</sup>   | 99.34 <sup>d</sup>   | 100.23 <sup>b</sup>  | 100.43 <sup>ba</sup> |
| 13.5                  | 91.10 <sup>d</sup>                   | 90.48 <sup>d</sup>   | 91.00 <sup>d</sup>   | 91.04 <sup>d</sup>   | 91.45 <sup>d</sup>   | 94.55 <sup>c</sup>   | 100.12               | 100.19 <sup>b</sup>  | 100.25 <sup>a</sup>  |
| 16                    | 86.90 <sup>c</sup>                   | 89.75 <sup>c</sup>   | 85.01 <sup>c</sup>   | 86.78 <sup>c</sup>   | 87.83 <sup>c</sup>   | 92.43 <sup>b</sup>   | 98.78 <sup>c</sup>   | 101.90 <sup>d</sup>  | 100.38 <sup>ba</sup> |
| 18                    | 84.56 <sup>b</sup>                   | 80.75 <sup>a</sup>   | 83.11 <sup>ab</sup>  | 84.99 <sup>b</sup>   | 85.51 <sup>b</sup>   | 89.10 <sup>a</sup>   | 96.90 <sup>b</sup>   | 102.32 <sup>d</sup>  | 99.98 <sup>a</sup>   |
| 20                    | 82.45 <sup>a</sup>                   | 82.48 <sup>b</sup>   | 82.58 <sup>a</sup>   | 83.34 <sup>a</sup>   | 83.92 <sup>a</sup>   | 89.12 <sup>a</sup>   | 97.38 <sup>b</sup>   | 99.98 <sup>a</sup>   | 100.31 <sup>ba</sup> |



Table S17. DPPH scavenging properties to samples with thiamine hydrochloride and EGCG

| thiamine<br>[mg/100g] | DPPH scavenging                  |                      |                      |                      |                      |                      |                      |                      |                      |
|-----------------------|----------------------------------|----------------------|----------------------|----------------------|----------------------|----------------------|----------------------|----------------------|----------------------|
|                       | Concentrations of EGCG [mg/100g] |                      |                      |                      |                      |                      |                      |                      |                      |
|                       | 0.04                             | 0.1                  | 0.5                  | 1.0                  | 2.0                  | 3.0                  | 4.0                  | 5.0                  | 6.0                  |
| 0                     | 100.00 <sup>g</sup>              | 100.00 <sup>g</sup>  | 100.00 <sup>f</sup>  | 100.00 <sup>e</sup>  | 100.00 <sup>f</sup>  | 100.00 <sup>f</sup>  | 100.00 <sup>fe</sup> | 100.00 <sup>c</sup>  | 100.00 <sup>b</sup>  |
| 0.01                  | 100.21 <sup>g</sup>              | 100.15 <sup>g</sup>  | 100.41 <sup>f</sup>  | 99.89 <sup>e</sup>   | 101.12 <sup>g</sup>  | 100.44 <sup>f</sup>  | 100.08 <sup>fe</sup> | 100.13 <sup>c</sup>  | 100.09 <sup>b</sup>  |
| 0.02                  | 100.65 <sup>g</sup>              | 100.52 <sup>g</sup>  | 100.25 <sup>f</sup>  | 99.54 <sup>e</sup>   | 102.08 <sup>hg</sup> | 100.87 <sup>gf</sup> | 100.45 <sup>gf</sup> | 100.09 <sup>c</sup>  | 99.78 <sup>ba</sup>  |
| 0.04                  | 99.78 <sup>g</sup>               | 100.00 <sup>g</sup>  | 100.50 <sup>gf</sup> | 100.08 <sup>e</sup>  | 100.99 <sup>gf</sup> | 100.57 <sup>gf</sup> | 99.64 <sup>e</sup>   | 100.00 <sup>c</sup>  | 100.00 <sup>b</sup>  |
| 0.06                  | 100.06 <sup>g</sup>              | 100.08 <sup>g</sup>  | 100.41 <sup>gf</sup> | 99.87 <sup>e</sup>   | 100.00               | 100.55 <sup>gf</sup> | 99.57 <sup>e</sup>   | 100.32 <sup>c</sup>  | 99.8b                |
| 0.08                  | 100.48 <sup>g</sup>              | 100.02 <sup>g</sup>  | 100.16 <sup>f</sup>  | 100.54 <sup>e</sup>  | 99.97 <sup>f</sup>   | 100.47 <sup>gf</sup> | 100.25 <sup>fe</sup> | 100.87 <sup>d</sup>  | 100.45 <sup>cb</sup> |
| 0.1                   | 99.98 <sup>g</sup>               | 100.98 <sup>g</sup>  | 99.98 <sup>f</sup>   | 99.78 <sup>e</sup>   | 100.20 <sup>f</sup>  | 99.98 <sup>f</sup>   | 101.43 <sup>hg</sup> | 100.03 <sup>c</sup>  | 99.78 <sup>ba</sup>  |
| 0.2                   | 103.89 <sup>h</sup>              | 103.56 <sup>ih</sup> | 104.56 <sup>i</sup>  | 102.56 <sup>f</sup>  | 103.56 <sup>i</sup>  | 101.56 <sup>hg</sup> | 102.35 <sup>ih</sup> | 100.98 <sup>d</sup>  | 100.36 <sup>cb</sup> |
| 0.4                   | 103.43 <sup>h</sup>              | 104.45 <sup>i</sup>  | 101.23 <sup>g</sup>  | 103.23 <sup>gf</sup> | 103.98 <sup>i</sup>  | 102.30 <sup>h</sup>  | 100.95 <sup>gf</sup> | 99.53 <sup>cb</sup>  | 99.78 <sup>ba</sup>  |
| 0.8                   | 105.04 <sup>i</sup>              | 105.87 <sup>j</sup>  | 105.69 <sup>j</sup>  | 105.13 <sup>h</sup>  | 105.45 <sup>j</sup>  | 104.23 <sup>ji</sup> | 104.56 <sup>j</sup>  | 100.50 <sup>dc</sup> | 100.50 <sup>c</sup>  |
| 1.0                   | 108.21                           | 108.98 <sup>k</sup>  | 107.23 <sup>k</sup>  | 107.64 <sup>i</sup>  | 107.56 <sup>k</sup>  | 106.25 <sup>k</sup>  | 105.98 <sup>k</sup>  | 102.23 <sup>e</sup>  | 100.25 <sup>cb</sup> |
| 2.0                   | 110.02 <sup>j</sup>              | 109.78 <sup>k</sup>  | 109.56 <sup>l</sup>  | 109.21 <sup>j</sup>  | 110.23 <sup>l</sup>  | 109.23 <sup>l</sup>  | 104.89 <sup>j</sup>  | 102.32 <sup>e</sup>  | 100.00 <sup>b</sup>  |
| 3.0                   | 105.23 <sup>i</sup>              | 105.45 <sup>j</sup>  | 105.79 <sup>j</sup>  | 105.23 <sup>h</sup>  | 105.45 <sup>j</sup>  | 105.31 <sup>k</sup>  | 103.03 <sup>i</sup>  | 100.00 <sup>c</sup>  | 100.00 <sup>b</sup>  |
| 4.0                   | 103.59 <sup>h</sup>              | 103.45 <sup>h</sup>  | 103.29 <sup>h</sup>  | 104.02 <sup>g</sup>  | 103.21 <sup>i</sup>  | 103.56 <sup>i</sup>  | 103.22 <sup>i</sup>  | 100.98 <sup>d</sup>  | 100.21 <sup>cb</sup> |
| 6.0                   | 94.98 <sup>e</sup>               | 95.03 <sup>e</sup>   | 95.23 <sup>e</sup>   | 94.98 <sup>d</sup>   | 96.01 <sup>e</sup>   | 96.02 <sup>e</sup>   | 99.65 <sup>e</sup>   | 100.50 <sup>dc</sup> | 100.03 <sup>b</sup>  |
| 8.0                   | 97.98 <sup>f</sup>               | 98.03 <sup>f</sup>   | 98.12 <sup>f</sup>   | 95.45 <sup>d</sup>   | 96.01 <sup>e</sup>   | 96.02 <sup>f</sup>   | 100.23 <sup>fe</sup> | 100.75 <sup>dc</sup> | 99.34 <sup>ba</sup>  |
| 9.0                   | 91.56 <sup>d</sup>               | 91.24 <sup>d</sup>   | 91.75 <sup>d</sup>   | 91.09 <sup>c</sup>   | 92.56 <sup>d</sup>   | 92.45 <sup>e</sup>   | 97.56 <sup>d</sup>   | 99.98 <sup>c</sup>   | 100.23 <sup>cb</sup> |
| 13.5                  | 85.69 <sup>c</sup>               | 86.58 <sup>c</sup>   | 86.45 <sup>c</sup>   | 86.46 <sup>b</sup>   | 86.55 <sup>c</sup>   | 87.69 <sup>d</sup>   | 88.21 <sup>c</sup>   | 98.89 <sup>b</sup>   | 99.56 <sup>ba</sup>  |
| 16                    | 84.12 <sup>b</sup>               | 84.76 <sup>b</sup>   | 83.75 <sup>b</sup>   | 84.23 <sup>b</sup>   | 84.59 <sup>b</sup>   | 85.01 <sup>c</sup>   | 87.98 <sup>c</sup>   | 98.75 <sup>b</sup>   | 99.45 <sup>ba</sup>  |
| 18                    | 82.04 <sup>a</sup>               | 82.16 <sup>a</sup>   | 83.41 <sup>b</sup>   | 82.37 <sup>a</sup>   | 81.98 <sup>a</sup>   | 83.45 <sup>b</sup>   | 81.59 <sup>a</sup>   | 97.72 <sup>ba</sup>  | 98.99 <sup>a</sup>   |
| 20                    | 82.35 <sup>a</sup>               | 81.98 <sup>a</sup>   | 82.31 <sup>a</sup>   | 82.03 <sup>a</sup>   | 82.11 <sup>a</sup>   | 82.33 <sup>a</sup>   | 86.87 <sup>b</sup>   | 97.01 <sup>a</sup>   | 98.78 <sup>a</sup>   |

Table S18. DPPH scavenging to samples with thiamine pyrophosphate and EGCG

| thiamine<br>[mg/100g] | DPPH scavenging                  |                      |                      |                      |                      |                      |                     |                      |                     |
|-----------------------|----------------------------------|----------------------|----------------------|----------------------|----------------------|----------------------|---------------------|----------------------|---------------------|
|                       | Concentrations of EGCG [mg/100g] |                      |                      |                      |                      |                      |                     |                      |                     |
|                       | 0.04                             | 0.1                  | 0.5                  | 1.0                  | 2.0                  | 3.0                  | 4.0                 | 5.0                  | 6.0                 |
| 0                     | 100.00 <sup>f</sup>              | 100.00 <sup>h</sup>  | 100.00 <sup>h</sup>  | 100.00 <sup>hg</sup> | 100.00 <sup>g</sup>  | 100.00 <sup>g</sup>  | 100.00 <sup>f</sup> | 100.00 <sup>dc</sup> | 100.00 <sup>a</sup> |
| 0.01                  | 100.03 <sup>f</sup>              | 101.12 <sup>i</sup>  | 100.07 <sup>h</sup>  | 100.50 <sup>hg</sup> | 100.35 <sup>g</sup>  | 99.91 <sup>g</sup>   | 99.91 <sup>f</sup>  | 100.36 <sup>d</sup>  | 99.85 <sup>a</sup>  |
| 0.02                  | 100.12 <sup>f</sup>              | 100.05 <sup>h</sup>  | 100.36 <sup>h</sup>  | 100.75 <sup>hg</sup> | 100.61 <sup>hg</sup> | 100.27 <sup>g</sup>  | 100.27 <sup>f</sup> | 100.64 <sup>d</sup>  | 99.58 <sup>a</sup>  |
| 0.04                  | 100.03 <sup>f</sup>              | 100.11 <sup>h</sup>  | 99.98 <sup>hg</sup>  | 99.85 <sup>g</sup>   | 100.05 <sup>g</sup>  | 100.02 <sup>g</sup>  | 99.91 <sup>f</sup>  | 100.09 <sup>d</sup>  | 99.89 <sup>a</sup>  |
| 0.06                  | 99.89 <sup>f</sup>               | 100.08 <sup>h</sup>  | 99.09 <sup>gf</sup>  | 101.56 <sup>i</sup>  | 100.00 <sup>g</sup>  | 100.55 <sup>hg</sup> | 100.21 <sup>f</sup> | 99.95 <sup>c</sup>   | 100.03 <sup>a</sup> |
| 0.08                  | 99.78 <sup>f</sup>               | 100.02 <sup>h</sup>  | 100.17 <sup>h</sup>  | 100.97 <sup>ih</sup> | 100.03 <sup>g</sup>  | 100.87 <sup>hg</sup> | 101.56 <sup>g</sup> | 100.03 <sup>dc</sup> | 100.12 <sup>a</sup> |
| 0.1                   | 101.43 <sup>g</sup>              | 101.43 <sup>i</sup>  | 100.43 <sup>h</sup>  | 100.23 <sup>hg</sup> | 101.23 <sup>h</sup>  | 100.43 <sup>hg</sup> | 101.88 <sup>g</sup> | 100.23 <sup>d</sup>  | 100.21 <sup>a</sup> |
| 0.2                   | 103.28 <sup>h</sup>              | 102.56 <sup>j</sup>  | 103.05 <sup>i</sup>  | 103.29 <sup>kj</sup> | 103.56 <sup>i</sup>  | 103.59 <sup>ji</sup> | 102.03 <sup>g</sup> | 100.23 <sup>d</sup>  | 100.03 <sup>a</sup> |
| 0.4                   | 103.25 <sup>h</sup>              | 103.45 <sup>k</sup>  | 104.32 <sup>j</sup>  | 103.25 <sup>j</sup>  | 104.12 <sup>i</sup>  | 104.03 <sup>j</sup>  | 103.30 <sup>h</sup> | 101.23 <sup>fe</sup> | 100.02 <sup>a</sup> |
| 0.8                   | 105.12 <sup>j</sup>              | 105.11 <sup>l</sup>  | 105.35 <sup>k</sup>  | 104.23 <sup>k</sup>  | 105.11 <sup>j</sup>  | 104.09 <sup>j</sup>  | 104.01 <sup>h</sup> | 102.21 <sup>f</sup>  | 100.21 <sup>a</sup> |
| 1.0                   | 110.25 <sup>k</sup>              | 110.51 <sup>m</sup>  | 110.34 <sup>m</sup>  | 109.94 <sup>l</sup>  | 110.03 <sup>k</sup>  | 109.84 <sup>k</sup>  | 109.22 <sup>i</sup> | 100.59 <sup>e</sup>  | 100.35 <sup>a</sup> |
| 2.0                   | 111.09 <sup>k</sup>              | 110.56 <sup>m</sup>  | 110.28 <sup>m</sup>  | 111.84 <sup>m</sup>  | 111.93 <sup>l</sup>  | 111.74 <sup>l</sup>  | 111.12 <sup>j</sup> | 102.35               | 99.45 <sup>a</sup>  |
| 3.0                   | 107.56                           | 105.89 <sup>l</sup>  | 105.45 <sup>k</sup>  | 104.23 <sup>k</sup>  | 103.65 <sup>i</sup>  | 103.03 <sup>i</sup>  | 104.23 <sup>h</sup> | 101.35 <sup>ed</sup> | 100.03 <sup>a</sup> |
| 4.0                   | 104.59 <sup>i</sup>              | 103.21 <sup>kj</sup> | 103.56 <sup>ji</sup> | 102.36 <sup>ji</sup> | 103.51 <sup>i</sup>  | 101.02 <sup>h</sup>  | 104.01 <sup>h</sup> | 101.01 <sup>ed</sup> | 100.12 <sup>a</sup> |
| 6.0                   | 98.45 <sup>g</sup>               | 99.56 <sup>g</sup>   | 98.12 <sup>f</sup>   | 97.89 <sup>f</sup>   | 97.12 <sup>f</sup>   | 97.88 <sup>f</sup>   | 98.03 <sup>e</sup>  | 99.13 <sup>c</sup>   | 100.09 <sup>a</sup> |
| 8.0                   | 97.03 <sup>f</sup>               | 97.89 <sup>f</sup>   | 98.02 <sup>f</sup>   | 97.03 <sup>f</sup>   | 98.01 <sup>f</sup>   | 97.21 <sup>f</sup>   | 98.56 <sup>e</sup>  | 100.01 <sup>dc</sup> | 99.87 <sup>a</sup>  |
| 9.0                   | 91.90 <sup>e</sup>               | 91.03 <sup>e</sup>   | 90.89 <sup>e</sup>   | 89.68 <sup>e</sup>   | 91.43 <sup>e</sup>   | 91.32 <sup>e</sup>   | 97.45 <sup>d</sup>  | 97.23 <sup>a</sup>   | 100.25 <sup>a</sup> |
| 13.5                  | 87.21 <sup>d</sup>               | 87.12 <sup>d</sup>   | 85.32 <sup>d</sup>   | 86.32 <sup>d</sup>   | 85.42 <sup>d</sup>   | 86.56 <sup>d</sup>   | 87.12 <sup>c</sup>  | 98.56 <sup>cb</sup>  | 99.87 <sup>a</sup>  |
| 16                    | 85.24 <sup>c</sup>               | 84.38 <sup>c</sup>   | 84.29 <sup>c</sup>   | 84.67 <sup>c</sup>   | 83.46 <sup>c</sup>   | 83.88 <sup>c</sup>   | 86.45 <sup>c</sup>  | 98.32 <sup>b</sup>   | 100.19 <sup>a</sup> |
| 18                    | 81.12 <sup>b</sup>               | 80.23 <sup>b</sup>   | 80.03 <sup>b</sup>   | 80.56 <sup>b</sup>   | 78.99 <sup>b</sup>   | 79.61 <sup>b</sup>   | 80.51 <sup>b</sup>  | 98.01 <sup>ba</sup>  | 100.03 <sup>a</sup> |
| 20                    | 69.45 <sup>a</sup>               | 69.01 <sup>a</sup>   | 68.03 <sup>a</sup>   | 69.12 <sup>a</sup>   | 68.56 <sup>a</sup>   | 67.00 <sup>a</sup>   | 70.02 <sup>a</sup>  | 97.54 <sup>ba</sup>  | 99.99 <sup>a</sup>  |

Table S19. DPPH scavenging to samples with thiamine hydrochloride and EGC

| thiamine<br>[mg/100g] | DPPH scavenging                 |                      |                      |                      |                      |                       |                      |                      |                      |
|-----------------------|---------------------------------|----------------------|----------------------|----------------------|----------------------|-----------------------|----------------------|----------------------|----------------------|
|                       | Concentrations of EGC [mg/100g] |                      |                      |                      |                      |                       |                      |                      |                      |
|                       | 0.04                            | 0.1                  | 0.5                  | 1.0                  | 2.0                  | 3.0                   | 4.0                  | 5.0                  | 6.0                  |
| 0                     | 100.00 <sup>hg</sup>            | 100.00 <sup>hg</sup> | 100.00 <sup>hg</sup> | 100.00 <sup>g</sup>  | 100.00 <sup>hg</sup> | 100.00 <sup>g</sup>   | 100.00 <sup>e</sup>  | 100.00 <sup>cb</sup> | 100.04 <sup>cb</sup> |
| 0.01                  | 100.21 <sup>hg</sup>            | 100.21 <sup>hg</sup> | 100.50 <sup>h</sup>  | 100.08 <sup>g</sup>  | 100.45 <sup>h</sup>  | 100.21 <sup>hg</sup>  | 100.65 <sup>f</sup>  | 99.87 <sup>cb</sup>  | 99.89 <sup>b</sup>   |
| 0.02                  | 100.54 <sup>h</sup>             | 99.98 <sup>hg</sup>  | 99.54 <sup>g</sup>   | 100.50 <sup>g</sup>  | 100.35 <sup>hg</sup> | 99.91 <sup>g</sup>    | 99.91 <sup>e</sup>   | 100.36 <sup>c</sup>  | 100.07 <sup>cb</sup> |
| 0.04                  | 99.45 <sup>g</sup>              | 100.45 <sup>hg</sup> | 100.36 <sup>hg</sup> | 99.65 <sup>g</sup>   | 99.45 <sup>g</sup>   | 100.27 <sup>hg</sup>  | 100.27 <sup>fe</sup> | 99.45 <sup>b</sup>   | 99.67 <sup>ba</sup>  |
| 0.06                  | 99.56 <sup>hg</sup>             | 99.78 <sup>g</sup>   | 100.79 <sup>h</sup>  | 100.25 <sup>g</sup>  | 100.32 <sup>hg</sup> | 100.54 <sup>ihg</sup> | 99.91 <sup>e</sup>   | 100.09 <sup>cb</sup> | 99.07 <sup>ba</sup>  |
| 0.08                  | 100.23 <sup>hg</sup>            | 100.54 <sup>hg</sup> | 100.21 <sup>hg</sup> | 100.25 <sup>g</sup>  | 100.09 <sup>hg</sup> | 99.89 <sup>g</sup>    | 100.54 <sup>fe</sup> | 100.56 <sup>c</sup>  | 99.89 <sup>b</sup>   |
| 0.1                   | 100.21 <sup>hg</sup>            | 100.01 <sup>hg</sup> | 99.68 <sup>hg</sup>  | 99.83 <sup>g</sup>   | 100.32 <sup>hg</sup> | 99.96 <sup>g</sup>    | 100.33 <sup>fe</sup> | 100.65 <sup>c</sup>  | 99.60 <sup>ba</sup>  |
| 0.2                   | 103.98 <sup>j</sup>             | 103.35 <sup>j</sup>  | 102.36 <sup>i</sup>  | 102.36 <sup>h</sup>  | 100.89 <sup>h</sup>  | 101.56 <sup>ji</sup>  | 100.34 <sup>fe</sup> | 100.98 <sup>dc</sup> | 101.91 <sup>d</sup>  |
| 0.4                   | 104.23 <sup>kj</sup>            | 103.68 <sup>j</sup>  | 102.56 <sup>i</sup>  | 102.98 <sup>i</sup>  | 102.59 <sup>i</sup>  | 103.05                | 103.89 <sup>ji</sup> | 99.40 <sup>b</sup>   | 101.43 <sup>d</sup>  |
| 0.8                   | 105.03 <sup>lk</sup>            | 104.79 <sup>lk</sup> | 102.87 <sup>i</sup>  | 102.45 <sup>ih</sup> | 103.23 <sup>ji</sup> | 102.98 <sup>lk</sup>  | 102.56 <sup>hg</sup> | 102.56 <sup>fe</sup> | 100.89 <sup>dc</sup> |
| 1.0                   | 105.01 <sup>lk</sup>            | 104.68 <sup>k</sup>  | 105.02 <sup>j</sup>  | 103.56 <sup>ji</sup> | 103.98 <sup>kj</sup> | 103.89 <sup>ml</sup>  | 103.50 <sup>ih</sup> | 102.98 <sup>f</sup>  | 100.20 <sup>cb</sup> |
| 2.0                   | 105.67 <sup>l</sup>             | 105.21 <sup>l</sup>  | 105.64 <sup>j</sup>  | 105.45 <sup>k</sup>  | 105.02 <sup>l</sup>  | 104.32 <sup>m</sup>   | 104.56 <sup>j</sup>  | 101.86 <sup>ed</sup> | 100.98 <sup>dc</sup> |
| 3.0                   | 102.21 <sup>i</sup>             | 101.98 <sup>ri</sup> | 104.89 <sup>j</sup>  | 103.36 <sup>ji</sup> | 104.36 <sup>lk</sup> | 103.21 <sup>lk</sup>  | 101.98 <sup>g</sup>  | 100.03 <sup>cb</sup> | 100.25 <sup>cb</sup> |
| 4.0                   | 102.11 <sup>i</sup>             | 102.03 <sup>i</sup>  | 102.03 <sup>i</sup>  | 101.80 <sup>h</sup>  | 102.79 <sup>ji</sup> | 102.34 <sup>kj</sup>  | 100.35 <sup>fe</sup> | 100.07 <sup>cb</sup> | 100.35 <sup>cb</sup> |
| 6.0                   | 96.89 <sup>f</sup>              | 97.25 <sup>f</sup>   | 98.56 <sup>f</sup>   | 97.22 <sup>f</sup>   | 99.45 <sup>g</sup>   | 100.09 <sup>hg</sup>  | 100.23 <sup>fe</sup> | 101.32 <sup>d</sup>  | 99.87 <sup>ba</sup>  |
| 8.0                   | 96.91 <sup>f</sup>              | 97.09 <sup>f</sup>   | 98.04 <sup>f</sup>   | 97.03 <sup>f</sup>   | 98.23 <sup>f</sup>   | 98.21 <sup>f</sup>    | 100.04 <sup>fe</sup> | 100.03 <sup>cb</sup> | 100.02 <sup>cb</sup> |
| 9.0                   | 94.03 <sup>e</sup>              | 94.35 <sup>e</sup>   | 94.21 <sup>e</sup>   | 94.57 <sup>e</sup>   | 95.23 <sup>e</sup>   | 95.45 <sup>e</sup>    | 99.98 <sup>e</sup>   | 99.24 <sup>b</sup>   | 98.24 <sup>a</sup>   |
| 13.5                  | 90.49 <sup>d</sup>              | 91.65 <sup>d</sup>   | 90.19 <sup>d</sup>   | 91.23 <sup>d</sup>   | 91.12 <sup>d</sup>   | 90.23 <sup>d</sup>    | 97.25 <sup>d</sup>   | 100.09 <sup>cb</sup> | 99.87 <sup>ba</sup>  |
| 16                    | 87.09 <sup>c</sup>              | 87.85 <sup>c</sup>   | 87.04 <sup>c</sup>   | 89.42 <sup>c</sup>   | 88.67 <sup>c</sup>   | 88.04 <sup>c</sup>    | 93.45 <sup>c</sup>   | 100.58 <sup>c</sup>  | 99.12 <sup>ba</sup>  |
| 18                    | 86.21 <sup>b</sup>              | 85.21 <sup>b</sup>   | 85.23 <sup>b</sup>   | 86.54 <sup>b</sup>   | 87.25 <sup>b</sup>   | 86.14 <sup>b</sup>    | 89.19 <sup>b</sup>   | 99.45 <sup>b</sup>   | 98.45 <sup>a</sup>   |
| 20                    | 84.09 <sup>a</sup>              | 84.23 <sup>a</sup>   | 84.14 <sup>a</sup>   | 84.21 <sup>a</sup>   | 84.32 <sup>a</sup>   | 84.56 <sup>a</sup>    | 87.03 <sup>a</sup>   | 98.03 <sup>a</sup>   | 98.16 <sup>a</sup>   |

Table S20. DPPH scavenging to samples with thiamine pyrophosphate and EGC

| thiamine<br>[mg/100g] | DPPH scavenging                 |                      |                      |                      |                      |                      |                      |                      |                      |
|-----------------------|---------------------------------|----------------------|----------------------|----------------------|----------------------|----------------------|----------------------|----------------------|----------------------|
|                       | Concentrations of EGC [mg/100g] |                      |                      |                      |                      |                      |                      |                      |                      |
|                       | 0.04                            | 0.1                  | 0.5                  | 1.0                  | 2.0                  | 3.0                  | 4.0                  | 5.0                  | 6.0                  |
| 0                     | 100.00 <sup>gf</sup>            | 100.00 <sup>g</sup>  | 100.00 <sup>e</sup>  | 100.00 <sup>f</sup>  | 100.00 <sup>fe</sup> | 100.00 <sup>hg</sup> | 100.00               | 100.00 <sup>dc</sup> | 100.00 <sup>c</sup>  |
| 0.01                  | 100.07 <sup>gf</sup>            | 100.50 <sup>hg</sup> | 100.35 <sup>fe</sup> | 99.91 <sup>f</sup>   | 99.91 <sup>fe</sup>  | 100.36               | 100.00               | 100.64 <sup>ed</sup> | 99.82 <sup>cb</sup>  |
| 0.02                  | 100.36 <sup>g</sup>             | 99.78 <sup>g</sup>   | 100.02 <sup>fe</sup> | 99.45 <sup>f</sup>   | 100.27 <sup>f</sup>  | 100.64 <sup>hg</sup> | 99.91                | 100.36 <sup>ed</sup> | 100.09 <sup>cb</sup> |
| 0.04                  | 99.98 <sup>gf</sup>             | 99.85 <sup>g</sup>   | 100.05 <sup>fe</sup> | 100.02 <sup>f</sup>  | 99.91 <sup>fe</sup>  | 100.09 <sup>hg</sup> | 100.27               | 100.64 <sup>ed</sup> | 100.25 <sup>cb</sup> |
| 0.06                  | 100.21 <sup>gf</sup>            | 100.02 <sup>hg</sup> | 99.98 <sup>e</sup>   | 99.85 <sup>f</sup>   | 100.05 <sup>fe</sup> | 100.02 <sup>hg</sup> | 99.91                | 100.09 <sup>dc</sup> | 101.01 <sup>dc</sup> |
| 0.08                  | 100.03 <sup>gf</sup>            | 100.03 <sup>hg</sup> | 100.23 <sup>fe</sup> | 100.25 <sup>f</sup>  | 100.09 <sup>fe</sup> | 100.23 <sup>hg</sup> | 100.03               | 100.09 <sup>dc</sup> | 100.73 <sup>dc</sup> |
| 0.1                   | 99.35 <sup>f</sup>              | 101.21 <sup>ih</sup> | 100.44 <sup>gf</sup> | 99.44 <sup>f</sup>   | 99.24 <sup>e</sup>   | 99.66 <sup>g</sup>   | 99.44                | 100.89 <sup>ed</sup> | 99.73 <sup>cb</sup>  |
| 0.2                   | 100.44 <sup>g</sup>             | 102.04 <sup>i</sup>  | 102.98 <sup>h</sup>  | 102.69 <sup>hg</sup> | 101.46 <sup>g</sup>  | 101.32 <sup>i</sup>  | 101.33               | 101.04 <sup>e</sup>  | 100.05 <sup>c</sup>  |
| 0.4                   | 104.30 <sup>i</sup>             | 103.79 <sup>kj</sup> | 103.66 <sup>h</sup>  | 102.46 <sup>hg</sup> | 103.99 <sup>ih</sup> | 103.57 <sup>j</sup>  | 103.00               | 100.41 <sup>ed</sup> | 100.06 <sup>c</sup>  |
| 0.8                   | 104.26 <sup>i</sup>             | 103.00 <sup>j</sup>  | 103.01 <sup>h</sup>  | 102.87 <sup>h</sup>  | 103.05 <sup>h</sup>  | 103.47 <sup>j</sup>  | 103.53               | 102.47 <sup>f</sup>  | 99.89 <sup>cb</sup>  |
| 1.0                   | 104.47 <sup>i</sup>             | 104.41 <sup>lk</sup> | 104.73 <sup>i</sup>  | 104.51 <sup>i</sup>  | 104.16 <sup>i</sup>  | 104.25 <sup>kj</sup> | 104.06               | 103.44 <sup>g</sup>  | 100.06 <sup>c</sup>  |
| 2.0                   | 105.03 <sup>i</sup>             | 105.21 <sup>l</sup>  | 105.05 <sup>i</sup>  | 105.51 <sup>j</sup>  | 104.23 <sup>i</sup>  | 105.23 <sup>k</sup>  | 105.67               | 104.91 <sup>h</sup>  | 99.89 <sup>cb</sup>  |
| 3.0                   | 105.25                          | 103.58 <sup>j</sup>  | 103.14 <sup>h</sup>  | 101.92 <sup>g</sup>  | 101.34 <sup>g</sup>  | 100.72 <sup>ih</sup> | 101.92               | 99.04 <sup>cb</sup>  | 100.12 <sup>cb</sup> |
| 4.0                   | 102.28 <sup>h</sup>             | 100.90 <sup>h</sup>  | 101.25 <sup>g</sup>  | 100.05 <sup>gf</sup> | 101.20 <sup>g</sup>  | 98.71 <sup>f</sup>   | 101.70               | 98.70 <sup>b</sup>   | 101.65 <sup>d</sup>  |
| 6.0                   | 96.14 <sup>e</sup>              | 97.25 <sup>f</sup>   | 95.81 <sup>c</sup>   | 95.58 <sup>e</sup>   | 94.81 <sup>d</sup>   | 95.57 <sup>e</sup>   | 95.72 <sup>e</sup>   | 96.82 <sup>a</sup>   | 100.65 <sup>dc</sup> |
| 8.0                   | 98.68 <sup>g</sup>              | 99.54 <sup>g</sup>   | 99.67 <sup>e</sup>   | 98.68 <sup>f</sup>   | 99.66 <sup>e</sup>   | 98.86 <sup>f</sup>   | 100.21 <sup>hg</sup> | 101.66 <sup>fe</sup> | 100.92 <sup>dc</sup> |
| 9.0                   | 95.45 <sup>e</sup>              | 96.12 <sup>e</sup>   | 95.89 <sup>c</sup>   | 94.89 <sup>e</sup>   | 95.67 <sup>d</sup>   | 95.45 <sup>e</sup>   | 98.21 <sup>f</sup>   | 98.88 <sup>b</sup>   | 99.93 <sup>cb</sup>  |
| 13.5                  | 88.86 <sup>d</sup>              | 88.77 <sup>d</sup>   | 86.97 <sup>d</sup>   | 87.97 <sup>d</sup>   | 87.07 <sup>c</sup>   | 88.21 <sup>d</sup>   | 88.77 <sup>d</sup>   | 100.21 <sup>dc</sup> | 99.15 <sup>ba</sup>  |
| 16                    | 86.89 <sup>c</sup>              | 86.03 <sup>c</sup>   | 85.94 <sup>c</sup>   | 86.32 <sup>c</sup>   | 86.11 <sup>c</sup>   | 86.46 <sup>c</sup>   | 88.10 <sup>c</sup>   | 99.97 <sup>c</sup>   | 99.91 <sup>cb</sup>  |
| 18                    | 82.77 <sup>b</sup>              | 81.88 <sup>b</sup>   | 81.68 <sup>b</sup>   | 82.21 <sup>b</sup>   | 80.91 <sup>b</sup>   | 81.26 <sup>b</sup>   | 82.16 <sup>b</sup>   | 99.66 <sup>cb</sup>  | 99.24 <sup>ba</sup>  |
| 20                    | 71.10 <sup>a</sup>              | 70.66 <sup>a</sup>   | 69.68 <sup>a</sup>   | 70.77 <sup>a</sup>   | 70.21 <sup>a</sup>   | 70.70 <sup>a</sup>   | 79.99 <sup>a</sup>   | 99.19 <sup>cb</sup>  | 98.64 <sup>a</sup>   |

Table S21. DPPH scavenging to samples with thiamine hydrochloride and ECG

| thiamine<br>[mg/100g] | DPPH scavenging                  |                      |                      |                     |                     |                      |                     |                      |                      |
|-----------------------|----------------------------------|----------------------|----------------------|---------------------|---------------------|----------------------|---------------------|----------------------|----------------------|
|                       | Concentrations of cECG [mg/100g] |                      |                      |                     |                     |                      |                     |                      |                      |
|                       | 0.04                             | 0.1                  | 0.5                  | 1.0                 | 2.0                 | 3.0                  | 4.0                 | 5.0                  | 6.0                  |
| 0                     | 100.00 <sup>g</sup>              | 100.00 <sup>hg</sup> | 100.00 <sup>g</sup>  | 100.00 <sup>g</sup> | 100.00 <sup>g</sup> | 100.00 <sup>g</sup>  | 100.00 <sup>d</sup> | 100.00 <sup>b</sup>  | 100.04 <sup>cb</sup> |
| 0.01                  | 100.67 <sup>g</sup>              | 100.05 <sup>hg</sup> | 100.50 <sup>hg</sup> | 100.08 <sup>g</sup> | 100.61 <sup>g</sup> | 100.00 <sup>g</sup>  | 100.00 <sup>d</sup> | 100.64 <sup>cb</sup> | 99.89 <sup>cb</sup>  |
| 0.02                  | 101.70 <sup>h</sup>              | 101.12               | 100.07 <sup>g</sup>  | 100.50 <sup>g</sup> | 100.35 <sup>g</sup> | 99.91 <sup>g</sup>   | 99.91 <sup>d</sup>  | 100.36 <sup>b</sup>  | 100.07 <sup>cb</sup> |
| 0.04                  | 100.00 <sup>g</sup>              | 100.05 <sup>hg</sup> | 100.36 <sup>hg</sup> | 100.75 <sup>g</sup> | 100.61 <sup>g</sup> | 100.27 <sup>g</sup>  | 100.27 <sup>d</sup> | 100.64 <sup>cb</sup> | 99.67 <sup>b</sup>   |
| 0.06                  | 100.21 <sup>hg</sup>             | 99.89 <sup>hg</sup>  | 100.79 <sup>h</sup>  | 100.25 <sup>g</sup> | 100.09 <sup>g</sup> | 99.91 <sup>g</sup>   | 99.91 <sup>d</sup>  | 100.09 <sup>b</sup>  | 99.07 <sup>ba</sup>  |
| 0.08                  | 100.23 <sup>hg</sup>             | 99.56 <sup>g</sup>   | 100.34 <sup>hg</sup> | 100.25 <sup>g</sup> | 100.09 <sup>g</sup> | 100.09 <sup>g</sup>  | 99.89 <sup>d</sup>  | 100.09 <sup>b</sup>  | 99.89 <sup>cb</sup>  |
| 0.1                   | 101.56 <sup>ih</sup>             | 100.01 <sup>hg</sup> | 99.68 <sup>g</sup>   | 99.83 <sup>g</sup>  | 100.32 <sup>g</sup> | 99.96 <sup>g</sup>   | 100.33 <sup>d</sup> | 100.65 <sup>cb</sup> | 99.60 <sup>b</sup>   |
| 0.2                   | 103.45 <sup>j</sup>              | 103.35 <sup>j</sup>  | 103.69 <sup>j</sup>  | 104.03 <sup>i</sup> | 102.36 <sup>h</sup> | 100.93 <sup>hg</sup> | 100.34 <sup>d</sup> | 100.98 <sup>c</sup>  | 101.91 <sup>d</sup>  |
| 0.4                   | 104.48 <sup>k</sup>              | 105.50 <sup>k</sup>  | 102.28 <sup>i</sup>  | 104.28 <sup>i</sup> | 105.03 <sup>i</sup> | 103.35 <sup>i</sup>  | 102.00 <sup>e</sup> | 100.58 <sup>cb</sup> | 101.43 <sup>d</sup>  |
| 0.8                   | 106.09 <sup>l</sup>              | 106.92 <sup>l</sup>  | 106.74 <sup>k</sup>  | 106.18 <sup>j</sup> | 106.50 <sup>j</sup> | 105.28 <sup>j</sup>  | 105.61 <sup>f</sup> | 101.55 <sup>ed</sup> | 100.89 <sup>c</sup>  |
| 1.0                   | 109.26 <sup>m</sup>              | 110.03 <sup>m</sup>  | 108.28 <sup>l</sup>  | 108.69 <sup>k</sup> | 108.61 <sup>k</sup> | 107.30 <sup>k</sup>  | 107.03 <sup>g</sup> | 103.28 <sup>g</sup>  | 100.20 <sup>cb</sup> |
| 2.0                   | 111.07 <sup>n</sup>              | 110.83 <sup>n</sup>  | 110.61 <sup>m</sup>  | 110.26 <sup>l</sup> | 111.28 <sup>l</sup> | 110.28 <sup>l</sup>  | 105.94 <sup>f</sup> | 103.37 <sup>g</sup>  | 100.98 <sup>dc</sup> |
| 3.0                   | 103.23 <sup>j</sup>              | 101.03 <sup>ih</sup> | 103.98 <sup>j</sup>  | 103.36              | 104.36 <sup>i</sup> | 103.33 <sup>i</sup>  | 102.22 <sup>e</sup> | 101.01 <sup>dc</sup> | 100.32 <sup>cb</sup> |
| 4.0                   | 102.14 <sup>i</sup>              | 101.77 <sup>i</sup>  | 101.22 <sup>h</sup>  | 101.80 <sup>h</sup> | 102.79 <sup>h</sup> | 101.80 <sup>h</sup>  | 101.93 <sup>e</sup> | 102.36 <sup>gf</sup> | 101.85 <sup>d</sup>  |
| 6.0                   | 96.93 <sup>f</sup>               | 96.98 <sup>f</sup>   | 97.18 <sup>f</sup>   | 96.93 <sup>f</sup>  | 97.96 <sup>f</sup>  | 97.97 <sup>f</sup>   | 101.60 <sup>e</sup> | 102.45 <sup>gf</sup> | 100.03 <sup>cb</sup> |
| 8.0                   | 96.93 <sup>f</sup>               | 96.98 <sup>f</sup>   | 97.18 <sup>f</sup>   | 96.93 <sup>f</sup>  | 97.96 <sup>f</sup>  | 97.97 <sup>f</sup>   | 100.03 <sup>d</sup> | 102.70 <sup>gf</sup> | 99.58 <sup>cb</sup>  |
| 9.0                   | 93.51 <sup>e</sup>               | 93.19 <sup>e</sup>   | 93.70 <sup>e</sup>   | 93.04 <sup>e</sup>  | 94.51 <sup>e</sup>  | 94.40 <sup>e</sup>   | 99.51 <sup>d</sup>  | 101.93 <sup>fe</sup> | 99.45 <sup>ba</sup>  |
| 13.5                  | 90.56 <sup>d</sup>               | 90.23 <sup>d</sup>   | 89.98 <sup>d</sup>   | 90.03 <sup>d</sup>  | 90.10 <sup>d</sup>  | 89.98 <sup>d</sup>   | 91.05 <sup>c</sup>  | 100.21 <sup>b</sup>  | 98.25 <sup>a</sup>   |
| 16                    | 86.96 <sup>c</sup>               | 86.96 <sup>c</sup>   | 86.59 <sup>c</sup>   | 87.07 <sup>c</sup>  | 87.43 <sup>c</sup>  | 87.85 <sup>c</sup>   | 90.82 <sup>c</sup>  | 100.98 <sup>c</sup>  | 99.12 <sup>ba</sup>  |
| 18                    | 84.02 <sup>b</sup>               | 84.95 <sup>b</sup>   | 84.98 <sup>b</sup>   | 85.55 <sup>b</sup>  | 85.08 <sup>b</sup>  | 86.21 <sup>b</sup>   | 87.55 <sup>b</sup>  | 100.56 <sup>cb</sup> | 98.54 <sup>a</sup>   |
| 20                    | 83.05 <sup>a</sup>               | 83.45 <sup>a</sup>   | 83.56 <sup>a</sup>   | 83.07 <sup>a</sup>  | 83.56 <sup>a</sup>  | 83.07 <sup>a</sup>   | 84.97 <sup>a</sup>  | 97.98 <sup>a</sup>   | 98.12 <sup>a</sup>   |

Table S22. DPPH scavenging to samples with thiamine pyrophosphate and ECG

| thiamine<br>[mg/100g] | DPPH scavenging                 |                      |                      |                      |                      |                     |                      |                      |                      |
|-----------------------|---------------------------------|----------------------|----------------------|----------------------|----------------------|---------------------|----------------------|----------------------|----------------------|
|                       | Concentrations of ECG [mg/100g] |                      |                      |                      |                      |                     |                      |                      |                      |
|                       | 0.04                            | 0.1                  | 0.5                  | 1.0                  | 2.0                  | 3.0                 | 4.0                  | 5.0                  | 6.0                  |
| 0                     | 100.00 <sup>h</sup>             | 100.00 <sup>g</sup>  | 100.00 <sup>g</sup>  | 100.00 <sup>hg</sup> | 100.00 <sup>g</sup>  | 100.00 <sup>e</sup> | 100.00 <sup>fe</sup> | 100.00 <sup>b</sup>  | 100.00 <sup>b</sup>  |
| 0.01                  | 100.67 <sup>h</sup>             | 100.05 <sup>g</sup>  | 100.50 <sup>hg</sup> | 100.08 <sup>hg</sup> | 100.61 <sup>g</sup>  | 100.00 <sup>e</sup> | 100.03 <sup>fe</sup> | 100.64 <sup>cb</sup> | 99.82 <sup>b</sup>   |
| 0.02                  | 101.70 <sup>i</sup>             | 101.12 <sup>h</sup>  | 100.07 <sup>g</sup>  | 100.50 <sup>hg</sup> | 100.35 <sup>g</sup>  | 99.91 <sup>e</sup>  | 99.91 <sup>ed</sup>  | 100.36 <sup>e</sup>  | 100.09 <sup>cb</sup> |
| 0.04                  | 100.00 <sup>h</sup>             | 100.05 <sup>g</sup>  | 100.36 <sup>hg</sup> | 100.75 <sup>h</sup>  | 100.34 <sup>g</sup>  | 100.08 <sup>e</sup> | 100.27 <sup>fe</sup> | 100.64 <sup>cb</sup> | 100.25 <sup>cb</sup> |
| 0.06                  | 100.21 <sup>h</sup>             | 99.73 <sup>g</sup>   | 100.04 <sup>g</sup>  | 99.85 <sup>hg</sup>  | 100.05 <sup>g</sup>  | 100.02 <sup>e</sup> | 99.91 <sup>ed</sup>  | 99.85 <sup>ba</sup>  | 99.25 <sup>b</sup>   |
| 0.08                  | 100.03 <sup>h</sup>             | 100.03 <sup>g</sup>  | 100.23 <sup>g</sup>  | 100.25 <sup>hg</sup> | 100.09 <sup>g</sup>  | 100.23 <sup>e</sup> | 100.03 <sup>fe</sup> | 100.09 <sup>b</sup>  | 100.73 <sup>c</sup>  |
| 0.1                   | 100.45 <sup>h</sup>             | 100.45 <sup>hg</sup> | 99.45 <sup>g</sup>   | 99.25 <sup>g</sup>   | 100.25 <sup>g</sup>  | 99.45 <sup>e</sup>  | 100.90 <sup>f</sup>  | 100.90 <sup>c</sup>  | 99.25 <sup>ba</sup>  |
| 0.2                   | 102.30 <sup>i</sup>             | 101.58 <sup>ih</sup> | 102.07 <sup>i</sup>  | 102.31 <sup>i</sup>  | 102.58 <sup>ih</sup> | 102.61 <sup>f</sup> | 101.05 <sup>gf</sup> | 101.05 <sup>dc</sup> | 99.25 <sup>ba</sup>  |
| 0.4                   | 102.27 <sup>i</sup>             | 102.47 <sup>i</sup>  | 103.34 <sup>j</sup>  | 102.27 <sup>i</sup>  | 103.14 <sup>i</sup>  | 103.05 <sup>f</sup> | 102.32 <sup>hg</sup> | 102.32 <sup>e</sup>  | 100.25 <sup>ba</sup> |
| 0.8                   | 104.14 <sup>j</sup>             | 104.13 <sup>j</sup>  | 104.37 <sup>k</sup>  | 103.25 <sup>j</sup>  | 104.13 <sup>j</sup>  | 103.09 <sup>f</sup> | 103.03 <sup>ih</sup> | 103.03 <sup>fe</sup> | 101.23 <sup>c</sup>  |
| 1.0                   | 109.27 <sup>k</sup>             | 109.53 <sup>k</sup>  | 109.36 <sup>l</sup>  | 107.26 <sup>k</sup>  | 108.12 <sup>k</sup>  | 108.12 <sup>g</sup> | 108.24 <sup>k</sup>  | 102.11 <sup>e</sup>  | 99.61 <sup>b</sup>   |
| 2.0                   | 108.56 <sup>k</sup>             | 108.21 <sup>k</sup>  | 109.30 <sup>l</sup>  | 108.35 <sup>l</sup>  | 108.22 <sup>k</sup>  | 108.98 <sup>g</sup> | 105.96 <sup>j</sup>  | 103.21 <sup>f</sup>  | 101.37 <sup>c</sup>  |
| 3.0                   | 104.90 <sup>j</sup>             | 104.46 <sup>j</sup>  | 103.24 <sup>ij</sup> | 102.66 <sup>ji</sup> | 102.04 <sup>h</sup>  | 103.24 <sup>f</sup> | 100.36 <sup>fe</sup> | 100.00 <sup>b</sup>  | 100.45 <sup>b</sup>  |
| 4.0                   | 102.22 <sup>i</sup>             | 102.57 <sup>i</sup>  | 101.37 <sup>ih</sup> | 102.52 <sup>ji</sup> | 100.03 <sup>g</sup>  | 103.02 <sup>f</sup> | 100.02 <sup>fe</sup> | 99.13 <sup>ba</sup>  | 101.98 <sup>c</sup>  |
| 6.0                   | 98.57 <sup>g</sup>              | 97.13 <sup>f</sup>   | 96.90 <sup>f</sup>   | 96.13 <sup>f</sup>   | 96.89 <sup>f</sup>   | 97.04 <sup>d</sup>  | 98.14 <sup>c</sup>   | 100.01 <sup>b</sup>  | 99.56 <sup>b</sup>   |
| 8.0                   | 97.25 <sup>f</sup>              | 97.03 <sup>f</sup>   | 96.04 <sup>f</sup>   | 97.02 <sup>f</sup>   | 96.22 <sup>f</sup>   | 97.57 <sup>d</sup>  | 99.02 <sup>d</sup>   | 98.88 <sup>a</sup>   | 98.45 <sup>ba</sup>  |
| 9.0                   | 90.04 <sup>e</sup>              | 89.90 <sup>e</sup>   | 88.69 <sup>e</sup>   | 90.44 <sup>e</sup>   | 90.33 <sup>e</sup>   | 96.46 <sup>d</sup>  | 96.24 <sup>a</sup>   | 99.26 <sup>ba</sup>  | 100.24 <sup>ba</sup> |
| 13.5                  | 86.13 <sup>d</sup>              | 84.33 <sup>d</sup>   | 85.33 <sup>d</sup>   | 84.43 <sup>d</sup>   | 85.57 <sup>d</sup>   | 86.13 <sup>c</sup>  | 97.57 <sup>b</sup>   | 98.88 <sup>a</sup>   | 99.45 <sup>ba</sup>  |
| 16                    | 83.39 <sup>c</sup>              | 83.30 <sup>c</sup>   | 83.68 <sup>c</sup>   | 82.47 <sup>c</sup>   | 82.89 <sup>c</sup>   | 85.46 <sup>c</sup>  | 97.33 <sup>b</sup>   | 99.25 <sup>ba</sup>  | 98.78 <sup>ba</sup>  |
| 18                    | 79.24 <sup>b</sup>              | 79.04 <sup>b</sup>   | 79.57 <sup>b</sup>   | 78.00 <sup>b</sup>   | 78.62 <sup>b</sup>   | 79.52 <sup>b</sup>  | 97.02 <sup>ba</sup>  | 98.89 <sup>a</sup>   | 98.56 <sup>ba</sup>  |
| 20                    | 68.02 <sup>a</sup>              | 67.04 <sup>a</sup>   | 68.13 <sup>a</sup>   | 67.57 <sup>a</sup>   | 66.01 <sup>a</sup>   | 69.03 <sup>a</sup>  | 96.55 <sup>a</sup>   | 99.01 <sup>ba</sup>  | 97.98 <sup>a</sup>   |

Table S23. DPPH scavenging to samples with thiamine hydrochloride and caffeine

| thiamine<br>[mg/100g] | DPPH scavenging                      |                      |                      |                      |                      |                      |                      |                      |                      |
|-----------------------|--------------------------------------|----------------------|----------------------|----------------------|----------------------|----------------------|----------------------|----------------------|----------------------|
|                       | Concentrations of caffeine [mg/100g] |                      |                      |                      |                      |                      |                      |                      |                      |
|                       | 0.04                                 | 0.1                  | 0.5                  | 1.0                  | 2.0                  | 3.0                  | 4.0                  | 5.0                  | 6.0                  |
| 0                     | 100.00 <sup>f</sup>                  | 100.00 <sup>g</sup>  | 100.00 <sup>gf</sup> | 100.00 <sup>gf</sup> | 100.00 <sup>gf</sup> | 100.00 <sup>fe</sup> | 100.00 <sup>dc</sup> | 100.00 <sup>cb</sup> | 100.03 <sup>cb</sup> |
| 0.01                  | 100.67 <sup>gf</sup>                 | 100.05 <sup>g</sup>  | 100.50 <sup>g</sup>  | 100.08 <sup>gf</sup> | 100.61 <sup>g</sup>  | 100.00 <sup>fe</sup> | 100.00 <sup>dc</sup> | 100.64 <sup>cb</sup> | 99.67 <sup>ba</sup>  |
| 0.02                  | 101.70 <sup>hg</sup>                 | 100.20 <sup>g</sup>  | 99.76 <sup>f</sup>   | 100.50 <sup>g</sup>  | 100.35 <sup>g</sup>  | 99.91 <sup>fe</sup>  | 99.56 <sup>c</sup>   | 100.36 <sup>cb</sup> | 99.89 <sup>b</sup>   |
| 0.04                  | 100.00 <sup>f</sup>                  | 100.05 <sup>g</sup>  | 100.36 <sup>gf</sup> | 100.75 <sup>hg</sup> | 100.61 <sup>g</sup>  | 100.27 <sup>fe</sup> | 100.27 <sup>dc</sup> | 100.64 <sup>cb</sup> | 99.98 <sup>b</sup>   |
| 0.06                  | 99.89 <sup>f</sup>                   | 101.83 <sup>h</sup>  | 100.79 <sup>g</sup>  | 100.25 <sup>g</sup>  | 99.45 <sup>f</sup>   | 99.91 <sup>fe</sup>  | 99.91 <sup>dc</sup>  | 100.09 <sup>cb</sup> | 100.56 <sup>cb</sup> |
| 0.08                  | 100.04 <sup>gf</sup>                 | 100.04               | 100.78 <sup>g</sup>  | 100.25 <sup>g</sup>  | 100.09 <sup>gf</sup> | 101.54 <sup>hg</sup> | 99.98 <sup>dc</sup>  | 100.09 <sup>cb</sup> | 100.01 <sup>cb</sup> |
| 0.1                   | 99.98 <sup>f</sup>                   | 99.76 <sup>g</sup>   | 99.45 <sup>f</sup>   | 100.04 <sup>gf</sup> | 99.56 <sup>f</sup>   | 100.23 <sup>fe</sup> | 100.09 <sup>dc</sup> | 100.04 <sup>cb</sup> | 100.06 <sup>cb</sup> |
| 0.2                   | 100.09 <sup>fg</sup>                 | 100.05 <sup>g</sup>  | 99.89 <sup>f</sup>   | 100.00 <sup>gf</sup> | 99.80 <sup>gf</sup>  | 99.78 <sup>fe</sup>  | 100.89 <sup>ed</sup> | 100.27 <sup>cb</sup> | 100.09 <sup>cb</sup> |
| 0.4                   | 99.98 <sup>f</sup>                   | 99.78 <sup>g</sup>   | 99.89 <sup>f</sup>   | 100.56 <sup>g</sup>  | 100.47 <sup>g</sup>  | 100.89 <sup>f</sup>  | 100.86 <sup>ed</sup> | 99.67 <sup>ba</sup>  | 100.09 <sup>cb</sup> |
| 0.8                   | 101.45 <sup>gf</sup>                 | 100.78 <sup>hg</sup> | 99.85 <sup>f</sup>   | 100.45 <sup>g</sup>  | 99.78 <sup>gf</sup>  | 99.67 <sup>fe</sup>  | 99.56 <sup>c</sup>   | 99.03 <sup>ba</sup>  | 99.37 <sup>ba</sup>  |
| 1.0                   | 102.34 <sup>h</sup>                  | 102.98 <sup>i</sup>  | 100.89 <sup>hg</sup> | 101.34 <sup>h</sup>  | 100.05 <sup>gf</sup> | 99.78 <sup>fe</sup>  | 95.27 <sup>a</sup>   | 100.91 <sup>dc</sup> | 99.73 <sup>ba</sup>  |
| 2.0                   | 104.78 <sup>i</sup>                  | 104.56 <sup>j</sup>  | 102.56 <sup>i</sup>  | 102.56 <sup>i</sup>  | 100.99 <sup>hg</sup> | 101.34 <sup>hg</sup> | 102.56 <sup>g</sup>  | 101.47 <sup>ed</sup> | 102.81 <sup>e</sup>  |
| 3.0                   | 101.21 <sup>gf</sup>                 | 102.32 <sup>ih</sup> | 102.32 <sup>ih</sup> | 100.23 <sup>g</sup>  | 101.67 <sup>h</sup>  | 100.98 <sup>g</sup>  | 101.12 <sup>fe</sup> | 102.97 <sup>fe</sup> | 104.37 <sup>f</sup>  |
| 4.0                   | 100.07 <sup>gf</sup>                 | 99.78 <sup>g</sup>   | 101.45 <sup>h</sup>  | 102.45 <sup>i</sup>  | 103.45 <sup>j</sup>  | 99.87 <sup>fe</sup>  | 101.77 <sup>gf</sup> | 100.78 <sup>c</sup>  | 103.67 <sup>fe</sup> |
| 6.0                   | 98.38 <sup>e</sup>                   | 98.45 <sup>f</sup>   | 100.00 <sup>gf</sup> | 99.89 <sup>gf</sup>  | 99.91 <sup>gf</sup>  | 99.89 <sup>fe</sup>  | 100.11 <sup>dc</sup> | 100.11 <sup>cb</sup> | 100.92 <sup>dc</sup> |
| 8.0                   | 97.89 <sup>e</sup>                   | 96.10 <sup>e</sup>   | 97.12 <sup>e</sup>   | 99.11 <sup>f</sup>   | 99.13 <sup>f</sup>   | 99.89 <sup>fe</sup>  | 99.33 <sup>c</sup>   | 100.35 <sup>cb</sup> | 101.21 <sup>d</sup>  |
| 9.0                   | 94.52 <sup>d</sup>                   | 95.12 <sup>d</sup>   | 95.03 <sup>d</sup>   | 95.89 <sup>e</sup>   | 99.21 <sup>f</sup>   | 100.08               | 99.89 <sup>dc</sup>  | 100.00 <sup>cb</sup> | 100.56 <sup>cb</sup> |
| 13.5                  | 91.66 <sup>c</sup>                   | 91.03 <sup>c</sup>   | 91.55 <sup>c</sup>   | 91.59 <sup>d</sup>   | 92.01 <sup>d</sup>   | 95.10 <sup>d</sup>   | 100.67 <sup>ed</sup> | 101.79 <sup>e</sup>  | 98.98 <sup>a</sup>   |
| 16                    | 86.42 <sup>b</sup>                   | 85.89 <sup>b</sup>   | 85.56 <sup>b</sup>   | 86.47 <sup>c</sup>   | 88.38 <sup>c</sup>   | 92.89 <sup>c</sup>   | 99.33 <sup>c</sup>   | 100.03 <sup>cb</sup> | 98.75 <sup>a</sup>   |
| 18                    | 82.76 <sup>a</sup>                   | 82.21 <sup>a</sup>   | 83.89 <sup>a</sup>   | 85.42 <sup>b</sup>   | 85.83 <sup>b</sup>   | 89.65 <sup>b</sup>   | 100.23 <sup>d</sup>  | 98.97 <sup>a</sup>   | 100.02               |
| 20                    | 83.00 <sup>a</sup>                   | 83.03 <sup>a</sup>   | 84.21 <sup>a</sup>   | 83.89 <sup>a</sup>   | 84.47 <sup>a</sup>   | 89.67 <sup>a</sup>   | 98.00 <sup>b</sup>   | 99.78 <sup>ba</sup>  | 98.75 <sup>a</sup>   |

Table S24. DPPH scavenging to samples with thiamine pyrophosphate and caffeine

| thiamine<br>[mg/100g] | DPPH scavenging                      |                      |                      |                      |                      |                      |                      |                      |                      |
|-----------------------|--------------------------------------|----------------------|----------------------|----------------------|----------------------|----------------------|----------------------|----------------------|----------------------|
|                       | Concentrations of caffeine [mg/100g] |                      |                      |                      |                      |                      |                      |                      |                      |
|                       | 0.04                                 | 0.1                  | 0.5                  | 1.0                  | 2.0                  | 3.0                  | 4.0                  | 5.0                  | 6.0                  |
| 0                     | 100.00 <sup>ih</sup>                 | 100.00 <sup>ih</sup> | 100.00 <sup>ih</sup> | 100.00 <sup>fe</sup> | 100.00 <sup>gf</sup> | 100.00 <sup>gf</sup> | 100.00               | 100.00 <sup>cb</sup> | 100.03 <sup>dc</sup> |
| 0.01                  | 100.44 <sup>i</sup>                  | 99.82 <sup>h</sup>   | 100.27 <sup>ih</sup> | 99.85 <sup>fe</sup>  | 100.38 <sup>g</sup>  | 99.77 <sup>gf</sup>  | 99.80                | 100.41 <sup>cb</sup> | 100.03 <sup>dc</sup> |
| 0.02                  | 99.87 <sup>ih</sup>                  | 100.89 <sup>i</sup>  | 100.02 <sup>ih</sup> | 100.27 <sup>fe</sup> | 100.12 <sup>g</sup>  | 99.68 <sup>f</sup>   | 99.68                | 100.13 <sup>cb</sup> | 99.75 <sup>cb</sup>  |
| 0.04                  | 100.05 <sup>ih</sup>                 | 99.82 <sup>h</sup>   | 100.13 <sup>ih</sup> | 100.52 <sup>f</sup>  | 100.11 <sup>g</sup>  | 99.85 <sup>gf</sup>  | 100.04               | 100.41 <sup>cb</sup> | 100.07 <sup>dc</sup> |
| 0.06                  | 99.98 <sup>ih</sup>                  | 99.50 <sup>h</sup>   | 99.81 <sup>hg</sup>  | 99.62 <sup>fe</sup>  | 100.25 <sup>g</sup>  | 99.79 <sup>gf</sup>  | 100.03               | 100.24 <sup>cb</sup> | 100.12 <sup>d</sup>  |
| 0.08                  | 99.80 <sup>h</sup>                   | 99.80 <sup>h</sup>   | 99.78 <sup>hg</sup>  | 100.02 <sup>fe</sup> | 99.86 <sup>gf</sup>  | 100.00 <sup>gf</sup> | 99.80 <sup>fe</sup>  | 99.86 <sup>cb</sup>  | 99.56 <sup>cb</sup>  |
| 0.1                   | 99.42 <sup>h</sup>                   | 99.20 <sup>h</sup>   | 98.89 <sup>g</sup>   | 99.48 <sup>e</sup>   | 99.00 <sup>f</sup>   | 99.67 <sup>gf</sup>  | 99.53 <sup>d</sup>   | 99.65 <sup>cb</sup>  | 99.50 <sup>cb</sup>  |
| 0.2                   | 99.53 <sup>h</sup>                   | 99.49 <sup>h</sup>   | 99.33 <sup>hg</sup>  | 99.44 <sup>e</sup>   | 99.24 <sup>gf</sup>  | 99.22 <sup>f</sup>   | 100.33               | 99.50 <sup>cb</sup>  | 99.53 <sup>cb</sup>  |
| 0.4                   | 99.42 <sup>h</sup>                   | 99.22 <sup>h</sup>   | 99.33 <sup>hg</sup>  | 100.00 <sup>fe</sup> | 99.91 <sup>gf</sup>  | 99.65 <sup>gf</sup>  | 98.89 <sup>ed</sup>  | 99.09 <sup>ba</sup>  | 99.53 <sup>cb</sup>  |
| 0.8                   | 100.89 <sup>ji</sup>                 | 100.22 <sup>ih</sup> | 99.29 <sup>hg</sup>  | 99.89 <sup>fe</sup>  | 99.22 <sup>f</sup>   | 99.11 <sup>f</sup>   | 99.00 <sup>ed</sup>  | 98.47 <sup>a</sup>   | 99.46 <sup>cb</sup>  |
| 1.0                   | 101.78 <sup>i</sup>                  | 102.42 <sup>j</sup>  | 100.33 <sup>i</sup>  | 100.78 <sup>f</sup>  | 99.49 <sup>f</sup>   | 99.79 <sup>gf</sup>  | 94.71 <sup>a</sup>   | 100.35 <sup>cb</sup> | 99.47 <sup>cb</sup>  |
| 2.0                   | 104.22 <sup>k</sup>                  | 104.00 <sup>k</sup>  | 102.47 <sup>j</sup>  | 102.00 <sup>g</sup>  | 100.43 <sup>g</sup>  | 100.78 <sup>hg</sup> | 102.00               | 100.91 <sup>dc</sup> | 100.98 <sup>d</sup>  |
| 3.0                   | 99.52 <sup>h</sup>                   | 100.88 <sup>i</sup>  | 102.77 <sup>j</sup>  | 104.54 <sup>i</sup>  | 101.79 <sup>h</sup>  | 101.11 <sup>ih</sup> | 99.47 <sup>ed</sup>  | 99.09 <sup>ba</sup>  | 99.67 <sup>c</sup>   |
| 4.0                   | 99.49 <sup>h</sup>                   | 100.34 <sup>i</sup>  | 102.01 <sup>j</sup>  | 103.01 <sup>h</sup>  | 102.89 <sup>i</sup>  | 99.71 <sup>gf</sup>  | 101.61 <sup>g</sup>  | 100.62 <sup>cb</sup> | 99.73 <sup>c</sup>   |
| 6.0                   | 97.40 <sup>g</sup>                   | 98.59 <sup>g</sup>   | 100.14 <sup>ih</sup> | 100.03 <sup>fe</sup> | 98.93 <sup>e</sup>   | 99.31 <sup>f</sup>   | 100.07 <sup>fe</sup> | 100.16 <sup>cb</sup> | 100.76 <sup>dc</sup> |
| 8.0                   | 97.85 <sup>f</sup>                   | 96.24 <sup>f</sup>   | 97.26 <sup>f</sup>   | 99.25 <sup>e</sup>   | 98.47 <sup>e</sup>   | 99.42 <sup>e</sup>   | 99.21 <sup>ed</sup>  | 99.77 <sup>c</sup>   | 103.91 <sup>e</sup>  |
| 9.0                   | 93.54 <sup>e</sup>                   | 94.01 <sup>e</sup>   | 95.59 <sup>e</sup>   | 94.71 <sup>e</sup>   | 98.23 <sup>e</sup>   | 99.45 <sup>d</sup>   | 99.31 <sup>ed</sup>  | 99.42 <sup>ba</sup>  | 100.40 <sup>d</sup>  |
| 13.5                  | 90.67 <sup>d</sup>                   | 90.05 <sup>d</sup>   | 90.57 <sup>d</sup>   | 90.61 <sup>d</sup>   | 91.03 <sup>d</sup>   | 94.52 <sup>c</sup>   | 100.09 <sup>fe</sup> | 100.16 <sup>cb</sup> | 98.82 <sup>ba</sup>  |
| 16                    | 86.47 <sup>c</sup>                   | 84.91 <sup>b</sup>   | 84.58 <sup>c</sup>   | 85.49 <sup>c</sup>   | 87.40 <sup>c</sup>   | 92.00 <sup>b</sup>   | 98.35 <sup>dc</sup>  | 99.86 <sup>b</sup>   | 98.19 <sup>a</sup>   |
| 18                    | 83.26 <sup>a</sup>                   | 81.99 <sup>a</sup>   | 82.19 <sup>a</sup>   | 84.12 <sup>b</sup>   | 81.23 <sup>a</sup>   | 88.97 <sup>a</sup>   | 96.98 <sup>b</sup>   | 99.25 <sup>ba</sup>  | 99.12 <sup>cb</sup>  |
| 20                    | 85.68 <sup>b</sup>                   | 86.45 <sup>c</sup>   | 83.12 <sup>b</sup>   | 82.99 <sup>a</sup>   | 84.89 <sup>b</sup>   | 89.25 <sup>a</sup>   | 97.51 <sup>cb</sup>  | 99.58 <sup>b</sup>   | 98.75 <sup>ba</sup>  |



Table S25. ABTS scavenging to samples with thiamine hydrochloride and EGCG

| thiamine<br>[mg/100g] | ABTS scavenging                  |                      |                      |                      |                      |                      |                      |                      |                      |
|-----------------------|----------------------------------|----------------------|----------------------|----------------------|----------------------|----------------------|----------------------|----------------------|----------------------|
|                       | Concentrations of EGCG [mg/100g] |                      |                      |                      |                      |                      |                      |                      |                      |
|                       | 0.04                             | 0.1                  | 0.5                  | 1.0                  | 2.0                  | 3.0                  | 4.0                  | 5.0                  | 6.0                  |
| 0                     | 100.00 <sup>hg</sup>             | 100.00 <sup>ih</sup> | 100.00 <sup>ih</sup> | 100.00 <sup>ih</sup> | 100.00 <sup>gf</sup> | 100.00 <sup>g</sup>  | 100.00 <sup>d</sup>  | 100.00 <sup>dc</sup> | 100.00 <sup>cb</sup> |
| 0.01                  | 100.25 <sup>hg</sup>             | 100.23 <sup>ih</sup> | 100.09 <sup>ih</sup> | 99.12 <sup>h</sup>   | 99.21 <sup>f</sup>   | 100.21 <sup>g</sup>  | 99.87 <sup>d</sup>   | 100.13 <sup>dc</sup> | 100.09 <sup>cb</sup> |
| 0.02                  | 100.65 <sup>h</sup>              | 99.54 <sup>h</sup>   | 99.49 <sup>h</sup>   | 99.98 <sup>ih</sup>  | 100.21 <sup>gf</sup> | 100.56 <sup>hg</sup> | 100.23 <sup>d</sup>  | 100.11 <sup>dc</sup> | 100.21 <sup>dc</sup> |
| 0.04                  | 100.25 <sup>hg</sup>             | 100.38 <sup>ih</sup> | 100.45 <sup>i</sup>  | 100.65               | 100.45 <sup>g</sup>  | 100.89 <sup>h</sup>  | 99.45 <sup>d</sup>   | 99.87 <sup>c</sup>   | 100.03 <sup>cb</sup> |
| 0.06                  | 100.14 <sup>hg</sup>             | 100.12 <sup>ih</sup> | 99.45 <sup>h</sup>   | 99.78 <sup>ih</sup>  | 100.21 <sup>gf</sup> | 100.03 <sup>g</sup>  | 100.08 <sup>d</sup>  | 100.98 <sup>d</sup>  | 99.78 <sup>b</sup>   |
| 0.08                  | 99.58 <sup>g</sup>               | 100.23 <sup>ih</sup> | 100.78 <sup>i</sup>  | 100.65 <sup>i</sup>  | 100.45 <sup>g</sup>  | 100.78 <sup>hg</sup> | 100.67 <sup>d</sup>  | 100.07 <sup>c</sup>  | 100.12 <sup>cb</sup> |
| 0.1                   | 100.09 <sup>hg</sup>             | 100.98 <sup>i</sup>  | 100.03 <sup>ih</sup> | 100.21 <sup>ih</sup> | 99.56 <sup>f</sup>   | 100.25 <sup>hg</sup> | 100.25 <sup>d</sup>  | 99.58 <sup>c</sup>   | 100.21 <sup>cb</sup> |
| 0.2                   | 104.12 <sup>i</sup>              | 104.32 <sup>j</sup>  | 103.14 <sup>j</sup>  | 103.24 <sup>k</sup>  | 104.25 <sup>ih</sup> | 103.54 <sup>i</sup>  | 104.65 <sup>g</sup>  | 102.23 <sup>f</sup>  | 100.36 <sup>dc</sup> |
| 0.4                   | 104.32 <sup>i</sup>              | 103.21 <sup>j</sup>  | 102.32 <sup>j</sup>  | 101.56 <sup>ji</sup> | 103.56 <sup>h</sup>  | 103.25 <sup>i</sup>  | 102.12 <sup>e</sup>  | 100.23 <sup>dc</sup> | 100.23 <sup>cb</sup> |
| 0.8                   | 105.65 <sup>j</sup>              | 105.45 <sup>k</sup>  | 105.84 <sup>l</sup>  | 105.24 <sup>m</sup>  | 105.87 <sup>ji</sup> | 104.98 <sup>j</sup>  | 103.45 <sup>f</sup>  | 101.25 <sup>ed</sup> | 101.03 <sup>dc</sup> |
| 1.0                   | 106.06 <sup>k</sup>              | 105.89 <sup>k</sup>  | 105.56 <sup>lk</sup> | 105.96 <sup>m</sup>  | 105.24 <sup>ji</sup> | 104.56 <sup>ji</sup> | 102.39 <sup>e</sup>  | 101.25 <sup>ed</sup> | 100.25               |
| 2.0                   | 109.17 <sup>l</sup>              | 108.89 <sup>m</sup>  | 108.56 <sup>m</sup>  | 108.24 <sup>n</sup>  | 108.65 <sup>k</sup>  | 107.21 <sup>k</sup>  | 106.23 <sup>h</sup>  | 104.32 <sup>g</sup>  | 99.98 <sup>b</sup>   |
| 3.0                   | 103.76 <sup>i</sup>              | 103.74 <sup>kj</sup> | 103.57 <sup>j</sup>  | 104.56 <sup>l</sup>  | 104.03 <sup>ih</sup> | 103.89 <sup>i</sup>  | 102.99 <sup>fe</sup> | 101.32 <sup>ed</sup> | 100.00 <sup>cb</sup> |
| 4.0                   | 105.66 <sup>j</sup>              | 105.24               | 104.80 <sup>k</sup>  | 105.71 <sup>m</sup>  | 103.25 <sup>h</sup>  | 104.13 <sup>ji</sup> | 104.71 <sup>g</sup>  | 102.36 <sup>f</sup>  | 101.23 <sup>d</sup>  |
| 6.0                   | 97.12 <sup>f</sup>               | 97.32 <sup>gf</sup>  | 97.89 <sup>g</sup>   | 98.03 <sup>g</sup>   | 99.21 <sup>f</sup>   | 98.23 <sup>f</sup>   | 97.77 <sup>c</sup>   | 100.50 <sup>dc</sup> | 100.03 <sup>cb</sup> |
| 8.0                   | 99.56 <sup>g</sup>               | 96.56 <sup>f</sup>   | 94.56 <sup>f</sup>   | 93.21 <sup>f</sup>   | 95.98 <sup>e</sup>   | 96.02 <sup>e</sup>   | 99.87 <sup>d</sup>   | 100.75 <sup>dc</sup> | 99.34 <sup>ba</sup>  |
| 9.0                   | 91.24 <sup>e</sup>               | 91.24 <sup>e</sup>   | 91.75 <sup>e</sup>   | 91.09 <sup>e</sup>   | 92.56 <sup>d</sup>   | 92.45 <sup>d</sup>   | 97.56 <sup>c</sup>   | 99.98 <sup>c</sup>   | 100.23 <sup>cb</sup> |
| 13.5                  | 85.69 <sup>d</sup>               | 86.58 <sup>d</sup>   | 86.45 <sup>d</sup>   | 86.46 <sup>d</sup>   | 86.55 <sup>c</sup>   | 87.69 <sup>c</sup>   | 88.21 <sup>b</sup>   | 98.89 <sup>b</sup>   | 99.56 <sup>ba</sup>  |
| 16                    | 84.12 <sup>c</sup>               | 84.76 <sup>c</sup>   | 83.75 <sup>c</sup>   | 84.23 <sup>c</sup>   | 84.59 <sup>b</sup>   | 85.01 <sup>b</sup>   | 87.98 <sup>b</sup>   | 98.75 <sup>b</sup>   | 99.45 <sup>ba</sup>  |
| 18                    | 83.12 <sup>b</sup>               | 83.21 <sup>b</sup>   | 83.45 <sup>b</sup>   | 83.45 <sup>b</sup>   | 82.12 <sup>a</sup>   | 83.09 <sup>a</sup>   | 82.21 <sup>a</sup>   | 97.12 <sup>a</sup>   | 99.56 <sup>ba</sup>  |
| 20                    | 81.23 <sup>a</sup>               | 81.98 <sup>s</sup>   | 82.31 <sup>a</sup>   | 82.03 <sup>a</sup>   | 82.11 <sup>a</sup>   | 82.33 <sup>a</sup>   | 81.50 <sup>a</sup>   | 97.01 <sup>a</sup>   | 98.78 <sup>a</sup>   |

Table S26. ABTS scavenging to samples with thiamine pyrophosphate and EGCG

| thiamine<br>[mg/100g] | ABTS scavenging                  |                      |                      |                      |                      |                      |                      |                      |                      |
|-----------------------|----------------------------------|----------------------|----------------------|----------------------|----------------------|----------------------|----------------------|----------------------|----------------------|
|                       | Concentrations of EGCG [mg/100g] |                      |                      |                      |                      |                      |                      |                      |                      |
|                       | 0.04                             | 0.1                  | 0.5                  | 1.0                  | 2.0                  | 3.0                  | 4.0                  | 5.0                  | 6.0                  |
| 0                     | 100.00 <sup>hg</sup>             | 100.00 <sup>f</sup>  | 100.00 <sup>h</sup>  | 100.00 <sup>hg</sup> | 100.00 <sup>g</sup>  | 100.00 <sup>gf</sup> | 100.00 <sup>hg</sup> | 100.00 <sup>f</sup>  | 100.00 <sup>ba</sup> |
| 0.01                  | 100.00 <sup>hg</sup>             | 100.15 <sup>f</sup>  | 100.41 <sup>ji</sup> | 99.89 <sup>hg</sup>  | 100.89 <sup>hg</sup> | 100.44 <sup>hg</sup> | 99.87 <sup>hg</sup>  | 100.00 <sup>f</sup>  | 99.89 <sup>ba</sup>  |
| 0.02                  | 100.52 <sup>ihg</sup>            | 100.52 <sup>gf</sup> | 100.25 <sup>ji</sup> | 99.67 <sup>h</sup>   | 102.08               | 100.33 <sup>g</sup>  | 99.96 <sup>hg</sup>  | 100.45 <sup>gf</sup> | 99.94 <sup>ba</sup>  |
| 0.04                  | 100.00 <sup>hg</sup>             | 100.00 <sup>f</sup>  | 99.56 <sup>ihg</sup> | 100.08 <sup>hg</sup> | 100.99 <sup>h</sup>  | 100.22 <sup>g</sup>  | 99.98 <sup>hg</sup>  | 100.00 <sup>f</sup>  | 100.00 <sup>ba</sup> |
| 0.06                  | 99.89 <sup>g</sup>               | 100.08 <sup>f</sup>  | 99.09 <sup>hg</sup>  | 101.56 <sup>ji</sup> | 100.00 <sup>g</sup>  | 100.55 <sup>hg</sup> | 100.21 <sup>h</sup>  | 99.95 <sup>f</sup>   | 100.06 <sup>ba</sup> |
| 0.08                  | 99.67 <sup>g</sup>               | 100.02 <sup>f</sup>  | 100.17 <sup>i</sup>  | 100.97 <sup>ih</sup> | 99.89 <sup>g</sup>   | 100.87 <sup>hg</sup> | 100.19 <sup>h</sup>  | 101.25 <sup>h</sup>  | 100.50 <sup>b</sup>  |
| 0.1                   | 101.43 <sup>i</sup>              | 101.43 <sup>f</sup>  | 100.43 <sup>i</sup>  | 100.23 <sup>hg</sup> | 100.65 <sup>hg</sup> | 100.43 <sup>g</sup>  | 101.88 <sup>ji</sup> | 100.23 <sup>gf</sup> | 99.78 <sup>ba</sup>  |
| 0.2                   | 103.03 <sup>j</sup>              | 103.21 <sup>g</sup>  | 102.98 <sup>k</sup>  | 102.45 <sup>kj</sup> | 102.31 <sup>i</sup>  | 102.32 <sup>i</sup>  | 102.03 <sup>j</sup>  | 100.23 <sup>gf</sup> | 100.21 <sup>b</sup>  |
| 0.4                   | 104.78 <sup>k</sup>              | 104.65 <sup>g</sup>  | 103.45 <sup>l</sup>  | 104.98 <sup>l</sup>  | 104.56 <sup>j</sup>  | 103.99 <sup>j</sup>  | 101.40 <sup>ji</sup> | 101.23 <sup>h</sup>  | 99.78 <sup>ba</sup>  |
| 0.8                   | 104.98 <sup>k</sup>              | 104.99 <sup>h</sup>  | 104.85 <sup>m</sup>  | 105.03 <sup>l</sup>  | 105.45 <sup>kj</sup> | 105.51 <sup>k</sup>  | 104.45 <sup>l</sup>  | 100.91 <sup>hg</sup> | 100.48 <sup>b</sup>  |
| 1.0                   | 106.45 <sup>l</sup>              | 106.71 <sup>i</sup>  | 106.54 <sup>n</sup>  | 106.14 <sup>m</sup>  | 106.23 <sup>lk</sup> | 106.04 <sup>k</sup>  | 105.42 <sup>l</sup>  | 100.59 <sup>gf</sup> | 100.25 <sup>b</sup>  |
| 2.0                   | 109.01 <sup>m</sup>              | 108.59 <sup>j</sup>  | 109.05 <sup>o</sup>  | 109.12 <sup>n</sup>  | 108.77 <sup>m</sup>  | 109.21 <sup>l</sup>  | 108.45 <sup>m</sup>  | 103.91 <sup>i</sup>  | 100.02 <sup>ba</sup> |
| 3.0                   | 104.21 <sup>k</sup>              | 104.03 <sup>hg</sup> | 103.21 <sup>l</sup>  | 103.02 <sup>k</sup>  | 102.56 <sup>i</sup>  | 102.56 <sup>i</sup>  | 103.03 <sup>k</sup>  | 100.97 <sup>g</sup>  | 100.03 <sup>ba</sup> |
| 4.0                   | 100.86 <sup>ih</sup>             | 100.54 <sup>fg</sup> | 100.89 <sup>j</sup>  | 101.88 <sup>ji</sup> | 100.89 <sup>hg</sup> | 101.02 <sup>h</sup>  | 100.98 <sup>ih</sup> | 100.35 <sup>gf</sup> | 99.89 <sup>ba</sup>  |
| 6.0                   | 98.88 <sup>g</sup>               | 98.56 <sup>e</sup>   | 98.91 <sup>g</sup>   | 99.90 <sup>hg</sup>  | 98.91 <sup>g</sup>   | 99.04 <sup>f</sup>   | 99.00 <sup>g</sup>   | 98.37 <sup>e</sup>   | 100.21 <sup>b</sup>  |
| 8.0                   | 96.50 <sup>f</sup>               | 95.03 <sup>d</sup>   | 96.45 <sup>f</sup>   | 96.12 <sup>f</sup>   | 97.01 <sup>f</sup>   | 97.41 <sup>e</sup>   | 97.23 <sup>f</sup>   | 97.56 <sup>e</sup>   | 100.08 <sup>ba</sup> |
| 9.0                   | 94.12 <sup>e</sup>               | 94.51 <sup>d</sup>   | 94.15 <sup>e</sup>   | 94.98 <sup>e</sup>   | 95.12 <sup>e</sup>   | 95.45 <sup>e</sup>   | 95.78 <sup>e</sup>   | 95.12 <sup>d</sup>   | 99.87 <sup>ba</sup>  |
| 13.5                  | 91.94 <sup>d</sup>               | 91.62 <sup>d</sup>   | 91.97 <sup>d</sup>   | 92.96 <sup>d</sup>   | 91.97 <sup>d</sup>   | 92.10 <sup>d</sup>   | 92.06 <sup>d</sup>   | 91.43 <sup>c</sup>   | 99.12 <sup>a</sup>   |
| 16                    | 88.96 <sup>c</sup>               | 88.54 <sup>c</sup>   | 88.78 <sup>c</sup>   | 88.61 <sup>c</sup>   | 88.12 <sup>c</sup>   | 88.78 <sup>c</sup>   | 88.35 <sup>c</sup>   | 90.56 <sup>b</sup>   | 100.19 <sup>b</sup>  |
| 18                    | 85.98 <sup>b</sup>               | 85.66 <sup>b</sup>   | 86.01 <sup>b</sup>   | 87.01 <sup>b</sup>   | 86.01 <sup>b</sup>   | 86.14 <sup>b</sup>   | 86.10 <sup>b</sup>   | 88.56 <sup>a</sup>   | 100.21 <sup>b</sup>  |
| 20                    | 83.00 <sup>a</sup>               | 82.68 <sup>a</sup>   | 83.03 <sup>a</sup>   | 84.02 <sup>a</sup>   | 83.03 <sup>a</sup>   | 83.16 <sup>a</sup>   | 83.12 <sup>a</sup>   | 88.12 <sup>a</sup>   | 100.03 <sup>ba</sup> |

Table S27. ABTS scavenging to samples with thiamine hydrochloride and EGC

| thiamine<br>[mg/100g] | ABTS scavenging                  |                     |                      |                      |                      |                      |                      |                      |                      |
|-----------------------|----------------------------------|---------------------|----------------------|----------------------|----------------------|----------------------|----------------------|----------------------|----------------------|
|                       | Concentrations of cEGC [mg/100g] |                     |                      |                      |                      |                      |                      |                      |                      |
|                       | 0.04                             | 0.1                 | 0.5                  | 1.0                  | 2.0                  | 3.0                  | 4.0                  | 5.0                  | 6.0                  |
| 0                     | 100.00 <sup>hg</sup>             | 100.00 <sup>g</sup> | 100.00 <sup>gf</sup> | 100.00 <sup>g</sup>  | 100.00 <sup>hg</sup> | 100.00 <sup>g</sup>  | 100.00 <sup>fe</sup> | 100.00 <sup>cb</sup> | 100.04 <sup>cb</sup> |
| 0.01                  | 100.21 <sup>hg</sup>             | 100.21 <sup>g</sup> | 100.50 <sup>gf</sup> | 100.08 <sup>g</sup>  | 100.45 <sup>h</sup>  | 100.21 <sup>hg</sup> | 100.65 <sup>fe</sup> | 99.87 <sup>cb</sup>  | 99.89 <sup>cb</sup>  |
| 0.02                  | 100.54 <sup>h</sup>              | 99.98 <sup>g</sup>  | 99.54 <sup>f</sup>   | 100.50 <sup>g</sup>  | 100.35 <sup>hg</sup> | 99.91 <sup>g</sup>   | 99.91 <sup>e</sup>   | 100.36 <sup>dc</sup> | 100.07 <sup>cb</sup> |
| 0.04                  | 99.45 <sup>g</sup>               | 100.45 <sup>g</sup> | 100.36 <sup>gf</sup> | 99.65 <sup>g</sup>   | 99.45 <sup>g</sup>   | 100.27 <sup>hg</sup> | 100.27 <sup>fe</sup> | 99.45 <sup>cb</sup>  | 99.67 <sup>b</sup>   |
| 0.06                  | 99.56 <sup>g</sup>               | 99.78 <sup>g</sup>  | 100.79 <sup>g</sup>  | 100.25 <sup>g</sup>  | 100.32 <sup>hg</sup> | 100.54 <sup>hg</sup> | 99.91 <sup>e</sup>   | 100.09 <sup>cb</sup> | 99.07 <sup>ba</sup>  |
| 0.08                  | 100.23 <sup>hg</sup>             | 100.54 <sup>g</sup> | 100.21 <sup>gf</sup> | 100.25 <sup>g</sup>  | 100.09 <sup>hg</sup> | 99.89 <sup>g</sup>   | 100.54 <sup>fe</sup> | 100.56 <sup>dc</sup> | 99.89 <sup>cb</sup>  |
| 0.1                   | 100.21 <sup>hg</sup>             | 100.01 <sup>g</sup> | 99.68 <sup>f</sup>   | 99.83 <sup>g</sup>   | 100.32 <sup>hg</sup> | 99.96 <sup>g</sup>   | 100.33 <sup>fe</sup> | 100.65 <sup>dc</sup> | 99.60 <sup>b</sup>   |
| 0.2                   | 103.98 <sup>i</sup>              | 103.35              | 102.36 <sup>h</sup>  | 102.36 <sup>ih</sup> | 100.89 <sup>h</sup>  | 101.56 <sup>i</sup>  | 100.34 <sup>fe</sup> | 100.98 <sup>d</sup>  | 101.91               |
| 0.4                   | 104.23 <sup>kj</sup>             | 103.68 <sup>h</sup> | 102.56 <sup>h</sup>  | 102.98 <sup>ji</sup> | 102.59 <sup>i</sup>  | 103.05               | 103.89 <sup>ih</sup> | 99.40 <sup>b</sup>   | 101.43               |
| 0.8                   | 105.03 <sup>lk</sup>             | 104.79 <sup>i</sup> | 102.87 <sup>h</sup>  | 102.45 <sup>ih</sup> | 103.23 <sup>ji</sup> | 102.98 <sup>ji</sup> | 102.56 <sup>hg</sup> | 102.56               | 100.89 <sup>c</sup>  |
| 1.0                   | 105.01 <sup>lk</sup>             | 104.68 <sup>i</sup> | 105.02 <sup>i</sup>  | 103.56 <sup>k</sup>  | 103.98 <sup>kj</sup> | 103.89 <sup>lk</sup> | 103.50 <sup>h</sup>  | 102.98 <sup>g</sup>  | 100.20 <sup>cb</sup> |
| 2.0                   | 105.67 <sup>l</sup>              | 105.21 <sup>i</sup> | 105.64 <sup>i</sup>  | 105.45 <sup>l</sup>  | 105.02 <sup>l</sup>  | 104.32 <sup>l</sup>  | 104.56 <sup>i</sup>  | 101.86 <sup>fe</sup> | 100.98 <sup>c</sup>  |
| 3.0                   | 104.23 <sup>kj</sup>             | 103.23 <sup>h</sup> | 104.89 <sup>i</sup>  | 103.36 <sup>ki</sup> | 104.36 <sup>lk</sup> | 103.21 <sup>kj</sup> | 101.98 <sup>g</sup>  | 100.03 <sup>cb</sup> | 100.25 <sup>cb</sup> |
| 4.0                   | 102.11 <sup>i</sup>              | 102.03 <sup>h</sup> | 102.03 <sup>h</sup>  | 101.80 <sup>h</sup>  | 102.79 <sup>i</sup>  | 102.34 <sup>ji</sup> | 100.35 <sup>fe</sup> | 100.07 <sup>cb</sup> | 100.35 <sup>cb</sup> |
| 6.0                   | 96.89 <sup>f</sup>               | 97.25 <sup>f</sup>  | 98.56 <sup>e</sup>   | 97.22 <sup>f</sup>   | 99.45 <sup>g</sup>   | 100.09 <sup>hg</sup> | 100.23 <sup>fe</sup> | 101.32 <sup>ed</sup> | 99.87 <sup>b</sup>   |
| 8.0                   | 96.91 <sup>f</sup>               | 97.09 <sup>f</sup>  | 98.04 <sup>e</sup>   | 97.03 <sup>f</sup>   | 98.23 <sup>f</sup>   | 98.21 <sup>f</sup>   | 100.04 <sup>e</sup>  | 100.03 <sup>cb</sup> | 100.02 <sup>cb</sup> |
| 9.0                   | 94.03 <sup>e</sup>               | 94.35 <sup>e</sup>  | 94.21 <sup>d</sup>   | 94.57 <sup>e</sup>   | 95.23 <sup>e</sup>   | 95.45 <sup>e</sup>   | 99.98 <sup>e</sup>   | 99.24 <sup>b</sup>   | 98.24 <sup>a</sup>   |
| 13.5                  | 90.49 <sup>d</sup>               | 91.65 <sup>d</sup>  | 90.19 <sup>c</sup>   | 91.23 <sup>d</sup>   | 91.12 <sup>d</sup>   | 90.23 <sup>d</sup>   | 97.25 <sup>d</sup>   | 100.09 <sup>cb</sup> | 99.87 <sup>cb</sup>  |
| 16                    | 87.09 <sup>c</sup>               | 87.85 <sup>c</sup>  | 87.04 <sup>b</sup>   | 89.42 <sup>c</sup>   | 88.67 <sup>c</sup>   | 88.04 <sup>c</sup>   | 93.45 <sup>c</sup>   | 100.58 <sup>dc</sup> | 99.12 <sup>ba</sup>  |
| 18                    | 86.21 <sup>b</sup>               | 85.21 <sup>b</sup>  | 85.23 <sup>a</sup>   | 86.54 <sup>b</sup>   | 87.25 <sup>b</sup>   | 86.14 <sup>b</sup>   | 89.19 <sup>b</sup>   | 99.45 <sup>cb</sup>  | 98.45 <sup>ba</sup>  |
| 20                    | 84.09 <sup>a</sup>               | 84.23 <sup>a</sup>  | 84.14 <sup>a</sup>   | 84.21 <sup>a</sup>   | 84.32 <sup>a</sup>   | 84.56 <sup>a</sup>   | 87.03 <sup>a</sup>   | 98.03 <sup>a</sup>   | 98.16 <sup>a</sup>   |

Table S28 ABTS scavenging to samples with thiamine pyrophosphate and EGC

| thiamine<br>[mg/100g] | ABTS scavenging                 |                      |                      |                      |                      |                      |                      |                      |                      |
|-----------------------|---------------------------------|----------------------|----------------------|----------------------|----------------------|----------------------|----------------------|----------------------|----------------------|
|                       | Concentrations of EGC [mg/100g] |                      |                      |                      |                      |                      |                      |                      |                      |
|                       | 0.04                            | 0.1                  | 0.5                  | 1.0                  | 2.0                  | 3.0                  | 4.0                  | 5.0                  | 6.0                  |
| 0                     | 100.00 <sup>gh</sup>            | 100.00 <sup>hg</sup> | 100.00 <sup>f</sup>  | 100.00 <sup>g</sup>  | 100.00 <sup>hg</sup> | 100.00 <sup>ih</sup> | 100.00 <sup>g</sup>  | 100.00 <sup>ih</sup> | 100.00 <sup>a</sup>  |
| 0.01                  | 100.25 <sup>gh</sup>            | 100.23 <sup>hg</sup> | 100.45 <sup>gf</sup> | 100.09 <sup>hg</sup> | 99.56 <sup>g</sup>   | 99.45 <sup>h</sup>   | 100.00 <sup>g</sup>  | 100.03 <sup>ih</sup> | 100.25 <sup>ba</sup> |
| 0.02                  | 99.56 <sup>h</sup>              | 100.23 <sup>hg</sup> | 100.23 <sup>gf</sup> | 100.21 <sup>hg</sup> | 100.32 <sup>hg</sup> | 99.56 <sup>h</sup>   | 100.02 <sup>hg</sup> | 99.56 <sup>h</sup>   | 100.21 <sup>ba</sup> |
| 0.04                  | 99.56 <sup>h</sup>              | 99.56 <sup>g</sup>   | 100.23 <sup>gf</sup> | 100.00 <sup>g</sup>  | 100.00 <sup>hg</sup> | 100.09 <sup>ih</sup> | 100.21 <sup>hg</sup> | 99.87 <sup>ih</sup>  | 99.78 <sup>a</sup>   |
| 0.06                  | 100.45 <sup>gh</sup>            | 100.00 <sup>hg</sup> | 100.03 <sup>f</sup>  | 100.08 <sup>g</sup>  | 100.45 <sup>hg</sup> | 100.68 <sup>i</sup>  | 100.78 <sup>hg</sup> | 100.77 <sup>i</sup>  | 100.07 <sup>ba</sup> |
| 0.08                  | 100.24 <sup>gh</sup>            | 100.00 <sup>hg</sup> | 100.34 <sup>gf</sup> | 99.87 <sup>g</sup>   | 99.12 <sup>g</sup>   | 100.35 <sup>ih</sup> | 100.78 <sup>hg</sup> | 100.21 <sup>ih</sup> | 100.89 <sup>b</sup>  |
| 0.1                   | 100.35 <sup>gh</sup>            | 100.89 <sup>h</sup>  | 100.12 <sup>gf</sup> | 99.89 <sup>g</sup>   | 100.24 <sup>hg</sup> | 100.38 <sup>ih</sup> | 100.45 <sup>hg</sup> | 100.87 <sup>ji</sup> | 100.87 <sup>b</sup>  |
| 0.2                   | 100.59 <sup>g</sup>             | 100.89 <sup>h</sup>  | 100.98 <sup>g</sup>  | 100.97 <sup>h</sup>  | 100.03 <sup>hg</sup> | 100.89 <sup>i</sup>  | 100.99 <sup>ih</sup> | 100.23 <sup>ih</sup> | 100.01 <sup>ba</sup> |
| 0.4                   | 104.23 <sup>i</sup>             | 104.56 <sup>j</sup>  | 104.78 <sup>j</sup>  | 104.03 <sup>j</sup>  | 103.45 <sup>j</sup>  | 103.21 <sup>j</sup>  | 103.56 <sup>j</sup>  | 104.56 <sup>l</sup>  | 100.45 <sup>ba</sup> |
| 0.8                   | 104.98 <sup>j</sup>             | 105.12 <sup>kj</sup> | 105.35 <sup>j</sup>  | 105.45 <sup>k</sup>  | 105.39 <sup>k</sup>  | 104.98 <sup>k</sup>  | 105.45 <sup>k</sup>  | 103.98 <sup>lk</sup> | 100.21 <sup>ba</sup> |
| 1.0                   | 106.12 <sup>k</sup>             | 105.89 <sup>k</sup>  | 106.12 <sup>kj</sup> | 105.78 <sup>lk</sup> | 105.78 <sup>k</sup>  | 105.23 <sup>lk</sup> | 105.01 <sup>k</sup>  | 103.13 <sup>k</sup>  | 101.03 <sup>cb</sup> |
| 2.0                   | 106.45 <sup>k</sup>             | 106.89 <sup>l</sup>  | 106.45 <sup>k</sup>  | 106.45 <sup>l</sup>  | 106.89 <sup>l</sup>  | 106.13 <sup>l</sup>  | 105.98 <sup>k</sup>  | 103.21 <sup>k</sup>  | 101.98 <sup>c</sup>  |
| 3.0                   | 103.21 <sup>i</sup>             | 103.12 <sup>i</sup>  | 103.56 <sup>i</sup>  | 102.54 <sup>i</sup>  | 102.89 <sup>i</sup>  | 103.45 <sup>j</sup>  | 103.98 <sup>j</sup>  | 101.36 <sup>j</sup>  | 100.98 <sup>cb</sup> |
| 4.0                   | 100.21 <sup>g</sup>             | 100.23 <sup>hg</sup> | 102.45 <sup>h</sup>  | 100.34 <sup>hg</sup> | 100.98 <sup>h</sup>  | 100.67 <sup>i</sup>  | 101.87 <sup>i</sup>  | 98.62 <sup>g</sup>   | 101.98 <sup>bc</sup> |
| 6.0                   | 98.18 <sup>g</sup>              | 95.98 <sup>f</sup>   | 100.42 <sup>gh</sup> | 98.31 <sup>f</sup>   | 99.26 <sup>hg</sup>  | 98.64 <sup>g</sup>   | 99.84 <sup>g</sup>   | 96.59 <sup>f</sup>   | 100.98 <sup>ba</sup> |
| 8.0                   | 98.45 <sup>f</sup>              | 98.49 <sup>g</sup>   | 98.12 <sup>e</sup>   | 98.89 <sup>f</sup>   | 97.23 <sup>f</sup>   | 96.61 <sup>f</sup>   | 97.81 <sup>f</sup>   | 98.56 <sup>g</sup>   | 100.23 <sup>ba</sup> |
| 9.0                   | 95.12 <sup>e</sup>              | 92.92 <sup>e</sup>   | 97.36 <sup>e</sup>   | 95.25 <sup>e</sup>   | 96.20 <sup>e</sup>   | 95.58 <sup>e</sup>   | 96.78 <sup>e</sup>   | 93.53 <sup>e</sup>   | 99.89 <sup>a</sup>   |
| 13.5                  | 94.09 <sup>d</sup>              | 91.89 <sup>d</sup>   | 96.33 <sup>d</sup>   | 94.22 <sup>d</sup>   | 95.17 <sup>d</sup>   | 94.55 <sup>d</sup>   | 95.75 <sup>d</sup>   | 92.50 <sup>d</sup>   | 100.56 <sup>ba</sup> |
| 16                    | 93.07 <sup>c</sup>              | 90.87 <sup>c</sup>   | 95.31 <sup>c</sup>   | 93.20 <sup>c</sup>   | 94.15 <sup>c</sup>   | 93.53 <sup>c</sup>   | 94.73 <sup>c</sup>   | 91.48 <sup>c</sup>   | 101.03 <sup>b</sup>  |
| 18                    | 92.05 <sup>b</sup>              | 89.85 <sup>b</sup>   | 94.29 <sup>b</sup>   | 92.18 <sup>b</sup>   | 93.13 <sup>b</sup>   | 92.51 <sup>b</sup>   | 93.71 <sup>b</sup>   | 90.46 <sup>b</sup>   | 100.03 <sup>ba</sup> |
| 20                    | 91.03 <sup>a</sup>              | 88.83 <sup>a</sup>   | 93.27 <sup>a</sup>   | 91.16 <sup>a</sup>   | 92.11 <sup>a</sup>   | 91.49 <sup>a</sup>   | 92.69 <sup>a</sup>   | 89.44 <sup>a</sup>   | 99.86 <sup>a</sup>   |

Table S29. ABTS scavenging to samples with thiamine hydrochloride and ECG

| thiamine<br>[mg/100g] | ABTS scavenging                 |                      |                      |                       |                      |                      |                      |                      |                      |
|-----------------------|---------------------------------|----------------------|----------------------|-----------------------|----------------------|----------------------|----------------------|----------------------|----------------------|
|                       | Concentrations of ECG [mg/100g] |                      |                      |                       |                      |                      |                      |                      |                      |
|                       | 0.04                            | 0.1                  | 0.5                  | 1.0                   | 2.0                  | 3.0                  | 4.0                  | 5.0                  | 6.0                  |
| 0                     |                                 |                      |                      |                       |                      |                      |                      |                      |                      |
| 0.01                  | 100.00 <sup>e</sup>             | 100.00 <sup>gf</sup> | 100.00 <sup>gf</sup> | 100.00 <sup>gf</sup>  | 100.00 <sup>f</sup>  | 100.00 <sup>gf</sup> | 100.00 <sup>ed</sup> | 100.00 <sup>a</sup>  | 100.04 <sup>cb</sup> |
| 0.02                  | 100.67 <sup>fe</sup>            | 100.05 <sup>gf</sup> | 100.50 <sup>gf</sup> | 100.08 <sup>gf</sup>  | 100.61 <sup>gf</sup> | 100.00 <sup>gf</sup> | 100.00 <sup>ed</sup> | 100.64 <sup>ba</sup> | 99.89 <sup>b</sup>   |
| 0.04                  | 101.70 <sup>gf</sup>            | 101.12 <sup>h</sup>  | 100.07 <sup>gf</sup> | 100.50 <sup>gf</sup>  | 100.35 <sup>gf</sup> | 99.91 <sup>f</sup>   | 99.91 <sup>ed</sup>  | 100.36 <sup>ba</sup> | 100.07 <sup>cb</sup> |
| 0.06                  | 100.00 <sup>e</sup>             | 100.05 <sup>gf</sup> | 100.36 <sup>gf</sup> | 100.75 <sup>hgf</sup> | 100.61 <sup>gf</sup> | 100.27 <sup>gf</sup> | 100.27 <sup>ed</sup> | 100.64 <sup>ba</sup> | 99.67 <sup>b</sup>   |
| 0.08                  | 100.21 <sup>e</sup>             | 99.89 <sup>f</sup>   | 100.79 <sup>g</sup>  | 100.25 <sup>gf</sup>  | 100.09 <sup>f</sup>  | 99.91 <sup>f</sup>   | 99.91 <sup>ed</sup>  | 100.09 <sup>a</sup>  | 99.07 <sup>ba</sup>  |
| 0.1                   | 100.23 <sup>e</sup>             | 99.56 <sup>f</sup>   | 100.34 <sup>gf</sup> | 100.25 <sup>gf</sup>  | 100.09 <sup>f</sup>  | 100.09 <sup>gf</sup> | 99.89 <sup>ed</sup>  | 100.09 <sup>a</sup>  | 99.89 <sup>b</sup>   |
| 0.2                   | 101.56 <sup>gf</sup>            | 100.01 <sup>gf</sup> | 99.68 <sup>f</sup>   | 99.83 <sup>f</sup>    | 100.32 <sup>gf</sup> | 99.96 <sup>f</sup>   | 100.33 <sup>ed</sup> | 100.65 <sup>ba</sup> | 99.60 <sup>b</sup>   |
| 0.4                   | 103.45 <sup>ih</sup>            | 103.35 <sup>i</sup>  | 103.69 <sup>i</sup>  | 104.03 <sup>ji</sup>  | 102.36 <sup>h</sup>  | 100.93 <sup>hg</sup> | 100.34 <sup>e</sup>  | 100.98 <sup>cb</sup> | 101.91 <sup>d</sup>  |
| 0.8                   | 104.08 <sup>ji</sup>            | 103.68 <sup>j</sup>  | 103.56 <sup>i</sup>  | 104.56 <sup>i</sup>   | 103.25 <sup>i</sup>  | 103.05 <sup>i</sup>  | 103.89 <sup>j</sup>  | 100.25 <sup>ba</sup> | 101.43 <sup>d</sup>  |
| 1.0                   | 104.98 <sup>kj</sup>            | 104.79 <sup>lk</sup> | 100.55 <sup>gf</sup> | 101.76 <sup>h</sup>   | 103.23 <sup>i</sup>  | 102.98 <sup>i</sup>  | 102.56 <sup>ih</sup> | 100.15 <sup>ba</sup> | 100.89 <sup>dc</sup> |
| 2.0                   | 104.86 <sup>kj</sup>            | 104.68 <sup>k</sup>  | 105.02 <sup>j</sup>  | 101.67 <sup>h</sup>   | 101.00 <sup>g</sup>  | 102.98 <sup>i</sup>  | 103.50 <sup>ji</sup> | 102.35 <sup>d</sup>  | 100.20 <sup>cb</sup> |
| 3.0                   | 105.67 <sup>k</sup>             | 105.45 <sup>l</sup>  | 106.02 <sup>j</sup>  | 105.09 <sup>k</sup>   | 104.89 <sup>j</sup>  | 104.68 <sup>k</sup>  | 102.56 <sup>ih</sup> | 101.86 <sup>dc</sup> | 100.98 <sup>d</sup>  |
| 4.0                   | 103.23 <sup>h</sup>             | 101.03 <sup>h</sup>  | 103.98 <sup>i</sup>  | 103.36 <sup>i</sup>   | 104.36 <sup>j</sup>  | 103.33 <sup>j</sup>  | 102.22 <sup>hg</sup> | 101.01 <sup>dc</sup> | 100.32 <sup>cb</sup> |
| 6.0                   | 102.14 <sup>hg</sup>            | 101.77 <sup>h</sup>  | 101.22 <sup>hg</sup> | 101.80 <sup>h</sup>   | 102.79 <sup>ih</sup> | 101.80 <sup>ih</sup> | 101.93 <sup>gf</sup> | 102.36 <sup>ed</sup> | 101.85 <sup>ed</sup> |
| 8.0                   | 96.93 <sup>d</sup>              | 96.98 <sup>e</sup>   | 97.18 <sup>e</sup>   | 96.93 <sup>e</sup>    | 97.96 <sup>e</sup>   | 97.97 <sup>e</sup>   | 101.60 <sup>f</sup>  | 102.45 <sup>ed</sup> | 100.03 <sup>cb</sup> |
| 9.0                   | 96.93 <sup>e</sup>              | 96.98 <sup>e</sup>   | 97.18 <sup>e</sup>   | 96.93 <sup>e</sup>    | 97.96 <sup>e</sup>   | 97.97 <sup>e</sup>   | 100.03 <sup>ed</sup> | 102.70 <sup>ed</sup> | 99.58 <sup>b</sup>   |
| 13.5                  | 93.51 <sup>d</sup>              | 93.19 <sup>d</sup>   | 93.70 <sup>d</sup>   | 93.04 <sup>d</sup>    | 94.51 <sup>d</sup>   | 94.40 <sup>d</sup>   | 99.51 <sup>d</sup>   | 101.93 <sup>dc</sup> | 99.45 <sup>b</sup>   |
| 16                    | 90.56 <sup>c</sup>              | 90.23 <sup>c</sup>   | 89.98 <sup>c</sup>   | 90.03 <sup>c</sup>    | 90.10 <sup>c</sup>   | 89.98 <sup>c</sup>   | 91.05 <sup>cb</sup>  | 100.21 <sup>ba</sup> | 98.25 <sup>a</sup>   |
| 18                    | 86.96 <sup>b</sup>              | 86.96 <sup>b</sup>   | 86.59 <sup>b</sup>   | 87.07 <sup>b</sup>    | 87.43 <sup>b</sup>   | 87.85 <sup>b</sup>   | 90.82 <sup>b</sup>   | 100.98 <sup>cb</sup> | 99.12 <sup>ba</sup>  |
| 20                    | 84.02 <sup>a</sup>              | 84.95 <sup>a</sup>   | 84.98 <sup>a</sup>   | 85.55 <sup>a</sup>    | 85.08 <sup>a</sup>   | 85.11 <sup>a</sup>   | 87.55 <sup>a</sup>   | 100.56 <sup>ba</sup> | 98.54 <sup>b</sup>   |

Table S30. ABTS scavenging to samples with thiamine pyrophosphate and ECG

| thiamine<br>[mg/100g] | ABTS scavenging                 |                      |                      |                      |                     |                      |                      |                      |                      |
|-----------------------|---------------------------------|----------------------|----------------------|----------------------|---------------------|----------------------|----------------------|----------------------|----------------------|
|                       | Concentrations of ECG [mg/100g] |                      |                      |                      |                     |                      |                      |                      |                      |
|                       | 0.04                            | 0.1                  | 0.5                  | 1.0                  | 2.0                 | 3.0                  | 4.0                  | 5.0                  | 6.0                  |
| 0                     | 100.00 <sup>g</sup>             | 100.00 <sup>g</sup>  | 100.00 <sup>h</sup>  | 100.00 <sup>f</sup>  | 100.00 <sup>h</sup> | 100.00 <sup>h</sup>  | 100.00 <sup>f</sup>  | 100.00 <sup>f</sup>  | 100.00 <sup>ba</sup> |
| 0.01                  | 100.67 <sup>hg</sup>            | 100.05 <sup>g</sup>  | 100.50 <sup>ih</sup> | 100.08 <sup>f</sup>  | 100.61 <sup>h</sup> | 100.00 <sup>h</sup>  | 100.00 <sup>f</sup>  | 100.64 <sup>gf</sup> | 99.82 <sup>ba</sup>  |
| 0.02                  | 101.70 <sup>ih</sup>            | 101.12 <sup>hg</sup> | 100.07 <sup>h</sup>  | 100.50 <sup>f</sup>  | 100.35 <sup>h</sup> | 99.91 <sup>h</sup>   | 99.91 <sup>f</sup>   | 100.36 <sup>gf</sup> | 100.09 <sup>ba</sup> |
| 0.04                  | 100.00 <sup>g</sup>             | 100.05 <sup>g</sup>  | 100.36 <sup>ih</sup> | 100.75 <sup>f</sup>  | 100.62 <sup>h</sup> | 100.25 <sup>h</sup>  | 99.78 <sup>f</sup>   | 99.45 <sup>f</sup>   | 100.25 <sup>b</sup>  |
| 0.06                  | 99.98 <sup>g</sup>              | 100.11 <sup>g</sup>  | 100.05 <sup>h</sup>  | 100.61 <sup>f</sup>  | 100.19 <sup>h</sup> | 100.12 <sup>h</sup>  | 100.56 <sup>gf</sup> | 99.89 <sup>f</sup>   | 100.08 <sup>ba</sup> |
| 0.08                  | 100.25 <sup>hg</sup>            | 100.54 <sup>hg</sup> | 100.89 <sup>ih</sup> | 100.07 <sup>f</sup>  | 100.45 <sup>h</sup> | 100.36 <sup>i</sup>  | 99.89 <sup>f</sup>   | 100.21 <sup>gf</sup> | 100.45 <sup>ba</sup> |
| 0.1                   | 100.89 <sup>hg</sup>            | 100.95 <sup>hg</sup> | 101.01 <sup>ji</sup> | 100.68 <sup>g</sup>  | 100.51 <sup>h</sup> | 100.89 <sup>ih</sup> | 100.98 <sup>hg</sup> | 100.38 <sup>gf</sup> | 100.78 <sup>b</sup>  |
| 0.2                   | 102.19 <sup>i</sup>             | 102.25 <sup>ji</sup> | 102.75 <sup>l</sup>  | 101.98 <sup>h</sup>  | 102.87 <sup>i</sup> | 101.89 <sup>i</sup>  | 101.79 <sup>ih</sup> | 101.98 <sup>h</sup>  | 100.25 <sup>b</sup>  |
| 0.4                   | 103.59 <sup>j</sup>             | 103.21 <sup>kj</sup> | 103.45 <sup>l</sup>  | 103.56 <sup>i</sup>  | 104.42 <sup>j</sup> | 104.00 <sup>k</sup>  | 103.43 <sup>kj</sup> | 100.84 <sup>g</sup>  | 100.06 <sup>ba</sup> |
| 0.8                   | 105.13 <sup>k</sup>             | 105.23 <sup>l</sup>  | 105.03 <sup>mn</sup> | 104.99 <sup>j</sup>  | 105.78 <sup>k</sup> | 104.56 <sup>lk</sup> | 104.12 <sup>lk</sup> | 103.99 <sup>i</sup>  | 100.21 <sup>ba</sup> |
| 1.0                   | 105.89 <sup>k</sup>             | 105.44 <sup>l</sup>  | 105.78 <sup>n</sup>  | 105.99 <sup>k</sup>  | 106.08 <sup>l</sup> | 104.56 <sup>lk</sup> | 104.89 <sup>l</sup>  | 104.23 <sup>i</sup>  | 101.01 <sup>c</sup>  |
| 2.0                   | 108.03 <sup>l</sup>             | 108.11 <sup>m</sup>  | 108.00 <sup>o</sup>  | 107.46 <sup>l</sup>  | 107.36 <sup>m</sup> | 106.98 <sup>m</sup>  | 105.98 <sup>m</sup>  | 104.28 <sup>i</sup>  | 100.35 <sup>ba</sup> |
| 3.0                   | 104.03 <sup>j</sup>             | 104.89 <sup>l</sup>  | 104.78 <sup>m</sup>  | 104.21 <sup>ji</sup> | 104.78 <sup>j</sup> | 103.21 <sup>kj</sup> | 102.54 <sup>ji</sup> | 102.34 <sup>h</sup>  | 100.98 <sup>cb</sup> |
| 4.0                   | 101.15 <sup>ih</sup>            | 101.56 <sup>ih</sup> | 101.89 <sup>k</sup>  | 101.89 <sup>h</sup>  | 103.34 <sup>i</sup> | 102.54 <sup>ji</sup> | 101.78 <sup>ih</sup> | 101.98 <sup>h</sup>  | 101.03 <sup>c</sup>  |
| 6.0                   | 95.68 <sup>f</sup>              | 95.99 <sup>f</sup>   | 100.02 <sup>h</sup>  | 98.98 <sup>e</sup>   | 97.56 <sup>g</sup>  | 97.98 <sup>g</sup>   | 97.03 <sup>e</sup>   | 99.89 <sup>f</sup>   | 99.87 <sup>ba</sup>  |
| 8.0                   | 94.21 <sup>e</sup>              | 94.35 <sup>e</sup>   | 94.12 <sup>g</sup>   | 93.59 <sup>d</sup>   | 94.21 <sup>f</sup>  | 94.03 <sup>f</sup>   | 96.02 <sup>d</sup>   | 98.21 <sup>e</sup>   | 100.01 <sup>ba</sup> |
| 9.0                   | 91.02 <sup>d</sup>              | 91.08 <sup>d</sup>   | 90.56 <sup>f</sup>   | 91.09 <sup>c</sup>   | 90.4 <sup>e</sup>   | 90.54 <sup>e</sup>   | 90.19 <sup>c</sup>   | 95.56 <sup>d</sup>   | 100.48 <sup>b</sup>  |
| 13.5                  | 90.23 <sup>c</sup>              | 91.03 <sup>d</sup>   | 90.78 <sup>f</sup>   | 90.77 <sup>c</sup>   | 91.03 <sup>d</sup>  | 89.56 <sup>d</sup>   | 90.25 <sup>c</sup>   | 96.23 <sup>d</sup>   | 100.07 <sup>ba</sup> |
| 16                    | 88.23 <sup>b</sup>              | 89.12 <sup>c</sup>   | 88.12 <sup>b</sup>   | 88.35 <sup>b</sup>   | 88.79 <sup>c</sup>  | 88.45 <sup>c</sup>   | 88.36 <sup>b</sup>   | 94.32 <sup>c</sup>   | 99.26 <sup>a</sup>   |
| 18                    | 87.56 <sup>b</sup>              | 87.32 <sup>b</sup>   | 87.98 <sup>b</sup>   | 86.21 <sup>a</sup>   | 88.12 <sup>b</sup>  | 87.21 <sup>b</sup>   | 87.65 <sup>b</sup>   | 92.56 <sup>b</sup>   | 100.23 <sup>ba</sup> |
| 20                    | 85.98 <sup>a</sup>              | 85.12 <sup>a</sup>   | 86.03 <sup>a</sup>   | 85.39 <sup>a</sup>   | 84.12 <sup>a</sup>  | 85.98 <sup>a</sup>   | 82.01 <sup>a</sup>   | 90.23 <sup>a</sup>   | 99.25 <sup>a</sup>   |

Table S31. ABTS scavenging to samples with thiamine hydrochloride and caffeine

| thiamine<br>[mg/100g] | ABTS scavenging                      |                      |                      |                      |                      |                      |                      |                      |                      |
|-----------------------|--------------------------------------|----------------------|----------------------|----------------------|----------------------|----------------------|----------------------|----------------------|----------------------|
|                       | Concentrations of caffeine [mg/100g] |                      |                      |                      |                      |                      |                      |                      |                      |
|                       | 0.04                                 | 0.1                  | 0.5                  | 1.0                  | 2.0                  | 3.0                  | 4.0                  | 5.0                  | 6.0                  |
| 0                     | 100.00 <sup>ed</sup>                 | 100.00 <sup>gf</sup> | 100.00 <sup>gf</sup> | 100.00 <sup>gf</sup> | 100.00 <sup>gf</sup> | 100.00 <sup>fe</sup> | 100.00 <sup>dc</sup> | 100.00 <sup>cb</sup> | 100.03 <sup>dc</sup> |
| 0.01                  | 100.67 <sup>e</sup>                  | 100.05 <sup>hg</sup> | 100.50 <sup>gf</sup> | 100.08 <sup>gf</sup> | 100.61 <sup>g</sup>  | 100.00 <sup>fe</sup> | 100.00 <sup>dc</sup> | 100.64 <sup>c</sup>  | 99.67 <sup>c</sup>   |
| 0.02                  | 101.70 <sup>fe</sup>                 | 100.20 <sup>hg</sup> | 99.76 <sup>f</sup>   | 100.50 <sup>gf</sup> | 100.35 <sup>gf</sup> | 99.91 <sup>e</sup>   | 99.56 <sup>c</sup>   | 100.36 <sup>cb</sup> | 99.89 <sup>c</sup>   |
| 0.04                  | 100.00 <sup>ed</sup>                 | 100.05 <sup>hg</sup> | 100.36 <sup>gf</sup> | 100.75 <sup>hg</sup> | 100.61 <sup>i</sup>  | 100.27 <sup>fe</sup> | 100.27 <sup>d</sup>  | 100.64 <sup>c</sup>  | 99.98 <sup>c</sup>   |
| 0.06                  | 99.89 <sup>ed</sup>                  | 101.83 <sup>ih</sup> | 100.79 <sup>g</sup>  | 100.25 <sup>gf</sup> | 99.45 <sup>f</sup>   | 99.91 <sup>e</sup>   | 99.91 <sup>dc</sup>  | 100.09 <sup>cb</sup> | 100.56 <sup>dc</sup> |
| 0.08                  | 100.04 <sup>ed</sup>                 | 100.04 <sup>hg</sup> | 100.78 <sup>gf</sup> | 100.25 <sup>gf</sup> | 100.09 <sup>gf</sup> | 101.54 <sup>gf</sup> | 99.98 <sup>dc</sup>  | 100.09 <sup>cb</sup> | 100.01 <sup>dc</sup> |
| 0.1                   | 99.98 <sup>ed</sup>                  | 99.76 <sup>gf</sup>  | 99.45 <sup>f</sup>   | 100.04 <sup>gf</sup> | 99.56 <sup>f</sup>   | 100.23 <sup>fe</sup> | 100.09 <sup>dc</sup> | 100.04 <sup>cb</sup> | 100.06 <sup>dc</sup> |
| 0.2                   | 100.09 <sup>ed</sup>                 | 100.05 <sup>hg</sup> | 99.89 <sup>f</sup>   | 100.00 <sup>gf</sup> | 99.80 <sup>gf</sup>  | 99.78 <sup>e</sup>   | 100.89 <sup>ed</sup> | 100.27 <sup>cb</sup> | 100.09 <sup>dc</sup> |
| 0.4                   | 99.98 <sup>ed</sup>                  | 99.78 <sup>gf</sup>  | 99.89 <sup>f</sup>   | 100.56               | 100.47 <sup>gf</sup> | 100.89 <sup>f</sup>  | 100.86 <sup>ed</sup> | 99.67 <sup>cb</sup>  | 100.09 <sup>dc</sup> |
| 0.8                   | 101.45 <sup>fe</sup>                 | 100.78 <sup>hg</sup> | 99.85 <sup>f</sup>   | 100.45 <sup>g</sup>  | 99.78 <sup>f</sup>   | 99.67 <sup>e</sup>   | 99.56 <sup>c</sup>   | 99.03 <sup>cb</sup>  | 99.37 <sup>b</sup>   |
| 1.0                   | 102.34 <sup>f</sup>                  | 102.98 <sup>i</sup>  | 100.89 <sup>ig</sup> | 101.34 <sup>h</sup>  | 100.05 <sup>gf</sup> | 99.78 <sup>e</sup>   | 95.27 <sup>a</sup>   | 100.91 <sup>dc</sup> | 99.73 <sup>cb</sup>  |
| 2.0                   | 104.78 <sup>g</sup>                  | 104.56 <sup>k</sup>  | 103.03 <sup>j</sup>  | 102.56 <sup>i</sup>  | 100.99 <sup>hg</sup> | 101.34 <sup>gf</sup> | 102.56 <sup>gf</sup> | 101.47 <sup>d</sup>  | 102.81 <sup>fe</sup> |
| 3.0                   | 100.78 <sup>e</sup>                  | 103.67 <sup>kj</sup> | 103.78 <sup>j</sup>  | 103.98               | 101.67 <sup>h</sup>  | 101.67 <sup>gf</sup> | 100.87 <sup>d</sup>  | 102.97 <sup>d</sup>  | 104.37 <sup>g</sup>  |
| 4.0                   | 100.07 <sup>ed</sup>                 | 99.78 <sup>gf</sup>  | 101.45 <sup>i</sup>  | 102.45 <sup>i</sup>  | 103.45 <sup>i</sup>  | 99.87 <sup>e</sup>   | 101.77 <sup>fe</sup> | 100.78 <sup>c</sup>  | 103.67 <sup>gf</sup> |
| 6.0                   | 98.94 <sup>d</sup>                   | 99.01 <sup>f</sup>   | 100.56 <sup>g</sup>  | 100.45 <sup>g</sup>  | 100.47 <sup>gf</sup> | 100.45 <sup>fe</sup> | 100.67 <sup>ed</sup> | 100.67 <sup>cb</sup> | 100.92 <sup>ed</sup> |
| 8.0                   | 99.34 <sup>e</sup>                   | 96.66 <sup>hg</sup>  | 97.68 <sup>e</sup>   | 99.67 <sup>f</sup>   | 99.69 <sup>f</sup>   | 100.56 <sup>fe</sup> | 99.89 <sup>dc</sup>  | 100.91 <sup>dc</sup> | 104.07 <sup>g</sup>  |
| 9.0                   | 95.08 <sup>d</sup>                   | 94.57 <sup>g</sup>   | 95.09 <sup>d</sup>   | 95.13 <sup>e</sup>   | 99.77 <sup>f</sup>   | 100.59 <sup>fe</sup> | 100.45               | 100.56 <sup>cb</sup> | 100.56 <sup>dc</sup> |
| 13.5                  | 92.22 <sup>c</sup>                   | 91.59 <sup>g</sup>   | 92.11 <sup>c</sup>   | 92.15 <sup>d</sup>   | 92.57 <sup>d</sup>   | 95.66 <sup>d</sup>   | 101.23               | 102.35 <sup>ed</sup> | 98.98 <sup>a</sup>   |
| 16                    | 86.98 <sup>b</sup>                   | 86.45 <sup>c</sup>   | 86.12 <sup>b</sup>   | 87.03 <sup>c</sup>   | 88.94 <sup>c</sup>   | 93.45 <sup>c</sup>   | 99.89 <sup>d c</sup> | 99.56 <sup>b</sup>   | 98.75 <sup>ba</sup>  |
| 18                    | 83.32 <sup>a</sup>                   | 81.87 <sup>a</sup>   | 84.45 <sup>a</sup>   | 85.98 <sup>b</sup>   | 86.39 <sup>b</sup>   | 90.21 <sup>b</sup>   | 95.12 <sup>a</sup>   | 99.78 <sup>cb</sup>  | 98.21 <sup>a</sup>   |
| 20                    | 83.56 <sup>a</sup>                   | 83.59 <sup>b</sup>   | 83.69 <sup>a</sup>   | 84.45 <sup>a</sup>   | 85.03 <sup>a</sup>   | 90.23 <sup>a</sup>   | 98.56 <sup>b</sup>   | 95.35 <sup>a</sup>   | 98.75 <sup>ba</sup>  |

Table S32. ABTS scavenging to samples with thiamine pyrophosphate and caffeine

| thiamine<br>[mg/100g] | ABTS scavenging                      |                      |                      |                      |                      |                      |                      |                      |                      |
|-----------------------|--------------------------------------|----------------------|----------------------|----------------------|----------------------|----------------------|----------------------|----------------------|----------------------|
|                       | Concentrations of caffeine [mg/100g] |                      |                      |                      |                      |                      |                      |                      |                      |
|                       | 0.04                                 | 0.1                  | 0.5                  | 1.0                  | 2.0                  | 3.0                  | 4.0                  | 5.0                  | 6.0                  |
| 0                     | 100.00 <sup>ed</sup>                 | 100.00 <sup>e</sup>  | 100.00 <sup>ge</sup> | 100.00 <sup>gf</sup> | 100.00 <sup>dc</sup> | 100.00 <sup>gf</sup> | 100.00 <sup>ed</sup> | 100.00 <sup>cb</sup> | 100.03 <sup>cb</sup> |
| 0.01                  | 100.23 <sup>ed</sup>                 | 100.56 <sup>fe</sup> | 99.56 <sup>fe</sup>  | 100.12 <sup>gf</sup> | 100.78 <sup>dc</sup> | 100.35 <sup>gf</sup> | 100.87 <sup>e</sup>  | 100.45 <sup>dc</sup> | 100.78 <sup>c</sup>  |
| 0.02                  | 101.03 <sup>fe</sup>                 | 100.54 <sup>e</sup>  | 100.89 <sup>hg</sup> | 100.73 <sup>g</sup>  | 100.03 <sup>dc</sup> | 100.21 <sup>gf</sup> | 100.78 <sup>e</sup>  | 100.89 <sup>dc</sup> | 100.03 <sup>cb</sup> |
| 0.04                  | 100.35 <sup>ed</sup>                 | 100.45 <sup>e</sup>  | 100.89 <sup>hg</sup> | 100.78 <sup>g</sup>  | 100.09 <sup>dc</sup> | 100.78 <sup>g</sup>  | 100.78 <sup>e</sup>  | 100.79 <sup>c</sup>  | 100.68 <sup>c</sup>  |
| 0.06                  | 100.78 <sup>ed</sup>                 | 100.32 <sup>e</sup>  | 100.78 <sup>hg</sup> | 100.09 <sup>gf</sup> | 100.32 <sup>dc</sup> | 100.76 <sup>g</sup>  | 100.78 <sup>e</sup>  | 100.29 <sup>dc</sup> | 100.45 <sup>cb</sup> |
| 0.08                  | 101.03 <sup>fe</sup>                 | 100.93 <sup>fe</sup> | 100.21 <sup>hg</sup> | 101.45 <sup>h</sup>  | 100.09 <sup>dc</sup> | 99.56 <sup>gf</sup>  | 99.78 <sup>c</sup>   | 100.05 <sup>cb</sup> | 100.12 <sup>cb</sup> |
| 0.1                   | 100.21 <sup>ed</sup>                 | 100.98 <sup>f</sup>  | 99.87 <sup>fe</sup>  | 100.06 <sup>gf</sup> | 100.21 <sup>dc</sup> | 100.78 <sup>g</sup>  | 100.67 <sup>ed</sup> | 100.67 <sup>c</sup>  | 100.32 <sup>cb</sup> |
| 0.2                   | 101.32 <sup>f</sup>                  | 101.12 <sup>gf</sup> | 100.65 <sup>hg</sup> | 100.26 <sup>g</sup>  | 99.98 <sup>dc</sup>  | 100.79 <sup>hg</sup> | 100.71 <sup>ed</sup> | 100.06 <sup>cb</sup> | 99.97 <sup>cb</sup>  |
| 0.4                   | 102.12 <sup>gf</sup>                 | 102.34 <sup>h</sup>  | 101.05 <sup>ih</sup> | 100.38 <sup>g</sup>  | 100.03 <sup>dc</sup> | 100.28 <sup>gf</sup> | 100.73 <sup>ed</sup> | 100.45 <sup>cb</sup> | 99.95 <sup>cb</sup>  |
| 0.8                   | 102.32 <sup>g</sup>                  | 102.12 <sup>h</sup>  | 101.12 <sup>ih</sup> | 100.56 <sup>hg</sup> | 100.45 <sup>d</sup>  | 99.78 <sup>gf</sup>  | 100.03 <sup>ed</sup> | 100.43 <sup>cb</sup> | 100.19 <sup>cb</sup> |
| 1.0                   | 102.99 <sup>g</sup>                  | 102.56 <sup>h</sup>  | 101.98 <sup>i</sup>  | 101.03 <sup>hg</sup> | 100.45 <sup>d</sup>  | 100.67 <sup>g</sup>  | 100.59 <sup>ed</sup> | 100.39 <sup>c</sup>  | 100.45 <sup>cb</sup> |
| 2.0                   | 104.23 <sup>h</sup>                  | 104.12 <sup>i</sup>  | 103.99 <sup>j</sup>  | 103.02 <sup>i</sup>  | 102.23 <sup>e</sup>  | 102.12 <sup>hi</sup> | 101.03 <sup>fe</sup> | 100.09 <sup>cb</sup> | 100.23 <sup>cb</sup> |
| 3.0                   | 104.56 <sup>h</sup>                  | 104.31 <sup>i</sup>  | 104.01 <sup>j</sup>  | 103.56 <sup>i</sup>  | 102.56 <sup>e</sup>  | 102.99 <sup>h</sup>  | 101.32 <sup>fe</sup> | 100.04 <sup>cb</sup> | 100.19 <sup>cb</sup> |
| 4.0                   | 100.45 <sup>e</sup>                  | 100.98 <sup>f</sup>  | 103.56 <sup>j</sup>  | 102.89 <sup>i</sup>  | 100.08 <sup>dc</sup> | 101.33 <sup>ih</sup> | 100.56 <sup>ed</sup> | 100.89 <sup>dc</sup> | 100.78 <sup>c</sup>  |
| 6.0                   | 96.45 <sup>d</sup>                   | 97.06 <sup>d</sup>   | 98.99 <sup>e</sup>   | 99.25 <sup>f</sup>   | 99.45 <sup>c</sup>   | 99.12 <sup>f</sup>   | 98.36 <sup>b</sup>   | 99.79 <sup>b</sup>   | 100.03 <sup>cb</sup> |
| 8.0                   | 97.12 <sup>e d</sup>                 | 96.32 <sup>d</sup>   | 96.78 <sup>d</sup>   | 97.56 <sup>e</sup>   | 100.03               | 99.18 <sup>f</sup>   | 99.56 <sup>c</sup>   | 98.12 <sup>a</sup>   | 100.03 <sup>cb</sup> |
| 9.0                   | 96.23 <sup>d</sup>                   | 97.03 <sup>d</sup>   | 97.12 <sup>d</sup>   | 98.32 <sup>e</sup>   | 99.45 <sup>c</sup>   | 99.65 <sup>gf</sup>  | 98.45 <sup>b</sup>   | 98.35 <sup>ba</sup>  | 99.12 <sup>ba</sup>  |
| 13.5                  | 91.65 <sup>c</sup>                   | 91.12 <sup>c</sup>   | 91.03 <sup>c</sup>   | 91.97 <sup>d</sup>   | 90.56 <sup>a</sup>   | 96.45 <sup>b</sup>   | 95.98 <sup>a</sup>   | 99.89 <sup>b</sup>   | 99.78 <sup>cba</sup> |
| 16                    | 89.39 <sup>b</sup>                   | 87.83 <sup>b</sup>   | 87.50 <sup>a</sup>   | 88.41 <sup>b</sup>   | 90.32 <sup>a</sup>   | 96.89 <sup>b</sup>   | 100.32 <sup>ed</sup> | 99.45 <sup>ba</sup>  | 99.45 <sup>ba</sup>  |
| 18                    | 87.11 <sup>a</sup>                   | 85.61 <sup>a</sup>   | 87.96 <sup>a</sup>   | 87.48 <sup>a</sup>   | 91.89 <sup>b</sup>   | 96.98 <sup>b</sup>   | 99.39 <sup>c</sup>   | 100.26 <sup>cb</sup> | 98.98 <sup>a</sup>   |
| 20                    | 87.30 <sup>a</sup>                   | 87.33 <sup>b</sup>   | 88.98 <sup>b</sup>   | 89.45 <sup>c</sup>   | 90.23 <sup>a</sup>   | 95.69 <sup>a</sup>   | 99.87 <sup>dc</sup>  | 99.96 <sup>b</sup>   | 100.03 <sup>cb</sup> |
